# Supplementary material for: Chemical Kinetic Study on Dual-Fuel Combustion: The Ignition Properties of n-Dodecane/Methane Mixture
Source: Hindawi journal article supplement (doi:10.1155/2021/7100812), 2021-11-22
Supplement: f1 [file 7100812.f1.txt]

!DETAILED LOW T AND HIGH T MECHANISM FOR SPECIES UP TO C12 + Xylenes (XYLENE)
!
!5/20/2012
!Version:Xylene+C12_v1.mech
!Authors:M. Mehl, M. Sarathy, C. Westbrook, W. Pitz
!LLNL
ELEMENTS
C H N O 
END
SPECIES
H H2 O O2 OH 
H2O N2 HO2 H2O2 CO 
CO2 CH2O HCO HO2CHO O2CHO 
HOCHO OCHO HOCH2O CH3OH CH2OH 
CH3O CH3O2H CH3O2 CH4 CH3 
CH2 CH2(S) CH C2H6 C2H5 
C2H4 C2H3 C2H2 C2H CH3CHO 
CH3CO CH2CHO CH2CO HCCO HCCOH 
CH3CO3H CH3CO3 CH3CO2 C2H5OH C2H5O 
SC2H4OH C2H5O2H C2H5O2 C2H4O2H C2H4O1-2 
C2H3O1-2 CH3COCH2 CH3COCH2O2 CH3COCH2O2H CH3COCH2O 
C2H3CHO C2H3CO C2H5CHO C2H5CO CH3OCO 
C3H8 IC3H7 NC3H7 C3H6 C3H5-A 
C3H5-S C3H5-T C3H4-P C3H4-A C3H3 
C3H2 C3H5O C3H6OOH1-2 C3H6OOH1-3 C3H6OOH1-2O2 
C3H6OOH1-3O2 NC3H7O2 NC3H7O C3H6O1-3 C3KET12 
C3KET13 CH3CHCO C4H8-1 C4H8-2 PC4H9 
C4H71-1 C4H71-3 C4H71-4 C4H72-2 C4H6 
PC4H9O2 PC4H9O C4H7O C4H8O1-2 C4H8O1-3 
C4H8OOH1-3 C4H8OOH1-3O2 NC4KET13 C2H5COCH3 C2H5COCH2 
CH2CH2COCH3 CH3CHCOCH3 C2H3COCH3 NC3H7CHO NC3H7CO 
C3H6CHO-2 C3H6CHO-3 C2H5CHCO SC3H5CHO SC3H5CO 
CH2CH2CHO IC4H9 IC4H8 IC4H7 IC4H7OH 
IC3H5CHO IC3H5CO IC3H5OH CH2CCH2OH C5H11-1 
C5H11-2 C5H10-1 C5H10-2 C5H81-3 C5H91-3 
C5H91-4 C5H92-4 C5H9O1-3 C5H11O2H-1 C5H11O2-1 
C5H11O2-2 C5H11O-1 C5H10OOH1-3 C5H10OOH2-4 C5H10O1-3 
C5H10OOH1-3O2 NC5KET13 C6H13-1 C6H13-2 C6H12-1 
C6H12-2 C6H111-3 C6H111-4 C6H111-5 C6H111-6 
C6H112-4 C6H112-5 C6H112-6 C6H113-1 C6H12O1-3 
C6H12O1-4 C6H13O2-1 C6H12OOH1-2 C6H12OOH1-3 C6H12OOH1-4 
C6H12OOH1-2O2 C6H12OOH1-3O2 NC6KET12 NC6KET13 C6H13O-1 
C6H12OH-2 NC4H9CHO NC4H9CO C4H8CHO-2 C4H8CHO-4 
AC3H5CHO AC3H5CO C2H3CHCHO NC3H7COCH3 NC3H7COCH2 
C2H5COC2H5 C2H5COC2H4P C7H15-1 C7H15-2 C7H15-3 
C7H15-4 C7H14-1 C7H14-2 C7H14-3 C7H131-4 
C7H131-5 C7H131-6 C7H132-4 C7H132-5 C7H133-5 
C7H133-6 C7H13O2-4 C7H13O3-5 C7H15O2-1 C7H15O2-3 
C7H15O2-4 C7H15O-1 C7H14OOH1-3 C7H14OOH1-4 C7H14OOH3-5 
C7H14OOH4-2 C7H14OOH1-3O2 C7H14O1-3 C7H14O1-4 C7H14O2-4 
NC7KET13 NC5H11CHO NC5H11CO C5H10CHO-2 C5H10CHO-3 
C4H7CHO1-4 NC4H9COCH3 NC4H9COCH2 C4H7OOH1-4 C4H7O1-4 
C5H9O1-4 C5H9OOH1-5 C5H9O1-5 C4H7CHO1-1 C4H7CO1-1 
NC3H7COC2H4P C6H101-3 C6H101-4 C6H101-5 C6H102-4 
ETES1 C6H112O2-4 C6H112O2-5 C6H102OOH5-4 C6H102OOH4-5 
C5H81-4 NC12H26 C12H25-1 C12H25-2 C12H25-3 
C12H25-4 C12H25-5 C12H25-6 C11H23-1 C11H23-4 
C11H23-5 NC10H22 C10H21-1 C10H21-2 C10H21-3 
C10H21-4 C10H21-5 C9H19-1 C9H19-2 C9H19-4 
C9H19-5 C8H17-1 C8H17-3 C8H17-4 C12H24-1 
C12H24-2 C12H24-3 C12H24-4 C12H24-5 C11H22-1 
C10H20-1 C10H20-4 C10H20-5 C9H18-1 C9H18-3 
C9H18-4 C8H16-1 C8H16-3 C8H16-4 C12H25O-1 
C12H25O-2 C12H25O-3 C12H25O-4 C12H25O-5 C12H25O-6 
C12H25O2-1 C12H25O2-2 C12H25O2-3 C12H25O2-4 C12H25O2-5 
C12H25O2-6 C11H23O2-1 C11H23O2-4 C11H23O2-5 C10H21O2-1 
C10H21O2-2 C10H21O2-4 C10H21O2-5 C9H19O2-1 C9H19O2-4 
C9H19O2-5 C8H17O2-1 C8H17O2-3 C8H17O2-4 C12H25O2H-2 
C12H25O2H-3 C12OOH1-2 C12OOH1-3 C12OOH1-4 C12OOH2-3 
C12OOH2-4 C12OOH2-5 C12OOH3-1 C12OOH3-2 C12OOH3-4 
C12OOH3-5 C12OOH3-6 C12OOH4-1 C12OOH4-2 C12OOH4-5 
C12OOH4-6 C12OOH4-7 C12OOH5-2 C12OOH5-3 C12OOH5-6 
C12OOH5-7 C12OOH5-8 C12OOH6-3 C12OOH6-4 C12OOH6-8 
C12OOH6-9 C11OOH1-3 C11OOH4-2 C11OOH5-3 C10OOH1-3 
C10OOH1-4 C10OOH2-4 C10OOH4-2 C10OOH5-4 C10OOH5-6 
C10OOH5-7 C9OOH1-2 C9OOH1-3 C9OOH4-3 C9OOH4-5 
C9OOH4-6 C9OOH5-3 C9OOH5-4 C8OOH1-2 C8OOH1-3 
C8OOH1-4 C8OOH3-4 C8OOH3-5 C8OOH4-2 C8OOH4-3 
C8OOH4-5 C8OOH4-6 C12OOH1-2O2 C12OOH1-3O2 C12OOH1-4O2 
C12OOH2-3O2 C12OOH2-4O2 C12OOH2-5O2 C12OOH3-1O2 C12OOH3-2O2 
C12OOH3-4O2 C12OOH3-5O2 C12OOH3-6O2 C12OOH4-2O2 C12OOH4-5O2 
C12OOH4-6O2 C12OOH4-7O2 C12OOH5-2O2 C12OOH5-3O2 C12OOH5-6O2 
C12OOH5-7O2 C12OOH5-8O2 C12OOH6-3O2 C12OOH6-4O2 C12OOH6-8O2 
C12OOH6-9O2 C11OOH1-3O2 C10OOH1-3O2 C10OOH5-4O2 C10OOH5-6O2 
C9OOH1-2O2 C9OOH1-3O2 C9OOH4-3O2 C9OOH4-5O2 C9OOH5-4O2 
C8OOH1-2O2 C8OOH1-3O2 C8OOH3-4O2 C8OOH4-3O2 C8OOH4-5O2 
C8OOH4-6O2 C12O1-2 C12O1-3 C12O1-4 C12O2-4 
C12O2-5 C12O3-4 C12O3-5 C12O3-6 C12O4-6 
C12O4-7 C12O5-8 C11O1-3 C11O2-4 C11O3-5 
C10O1-3 C10O1-4 C10O2-4 C9O1-3 C9O3-5 
C9O4-6 C8O1-3 C8O1-4 C8O2-4 C8O3-5 
C12KET1-2 C12KET1-3 C12KET1-4 C12KET2-3 C12KET2-4 
C12KET2-5 C12KET3-1 C12KET3-2 C12KET3-4 C12KET3-5 
C12KET3-6 C12KET4-2 C12KET4-5 C12KET4-6 C12KET4-7 
C12KET5-2 C12KET5-3 C12KET5-6 C12KET5-7 C12KET5-8 
C12KET6-3 C12KET6-4 C12KET6-8 C12KET6-9 C11KET1-3 
C10KET1-3 C10KET5-4 C10KET5-6 C9KET1-2 C9KET1-3 
C9KET4-3 C9KET4-5 C9KET5-4 C8KET1-2 C8KET1-3 
C8KET3-4 C8KET4-3 C8KET4-5 C8KET4-6 C9H19COCH2 
C8H17COCH2 C7H15COCH2 C6H13COCH2 C5H11COCH2 C7COC2H4P 
C6COC2H4P C5COC2H4P C4COC2H4P NC10H21CHO NC9H19CHO 
NC8H17CHO NC7H15CHO NC6H13CHO NC10H21CO NC9H19CO 
NC8H17CO NC7H15CO NC6H13CO CH3CHCHO C12H23 
C11H21 C10H19 C9H17 C8H15 EC6H13 
DC6H12 DC5H11 CC5H10 IC5H9 C7H16-2 
C7H15-2A C7H15-2B C7H15-2D C7H15-2E C7H14-1-2 
C7H15O-1-2 C7H15O-4-2 C7H15O-5-2 C7H15OOH-1-2 C8H18-2 
C8H17-2A C8H17-2C C8H17-2D C8H17-2E C8H17-2F 
C8H17-2G C8H16-1-2 C8H16-6-2 C8H15-1-2 C8H17O-1-2 
C8H17O-3-2 C8H17O-5-2 C8H17O-7-2 C8H17OOH-1-2 C10H22-2 
C10H21-2A C10H21-2D C10H21-2F C10H21-2I C11H24-2 
C11H23-2A C11H23-2F C11H22-5-2 C11H23OO-6-2 C11OOH6-2J 
C4H2 OC6H4O CY13PD C4H4 NC4H5 
C6H6 CY13PD5J CXCCXCCJ CYC5H7U1 CXOCCCJCXO 
CXOCCCJXO CXOCCCXO IND C6H5 C6H4 
CJCXCC#C 
END


REACTIONS MOLES CAL/MOLE
!
!
!
!       2-METHYLNONANE RO. SPECIES; RADICAL SITE ON THE OXYGEN
!
!       2-METHYLNONANE ROO. SPECIES; RADICAL SITE ON THE OXYGEN
!
!       2-METHYLNONANE ROOH SPECIES; NO RADICAL SITES
!
!       2-METHYLNONANE .QOOH SPECIES; C10H20-1DENOTED AS C10
!       A HYPHEN IS NOT USED TO INDICATE OOH POSITION
!       RADICAL SITE DENOTED BY LETTER;
!       INCLUDES TRANSITION STATE RINGS OF 5, 6, 7, AND 8 ATOMS
!
!
!
!
!
!
!
!
!
!       2-METHYLNONANE .OOQOOH SPECIES; C10H10 DENOTED AS C10
!       A HYPHEN IS NOT USED TO INDICATE OOH POSITION
!       A HYPHEN IS NOT USED TO INDICATE OO POSITION
!       RADICAL SITE ON THE OXYGEN IN O2
!
!
!
!
!
!
!
!
!
!       2-METHYLNONANE CYCLIC ETHER SPECIES; NO RADICAL SITES
!
!
!
!
!
!
!
!
!       2-METHYLNONANE KETO-HYDROPEROXIDE (KET) SPECIES; C10H20-1DENOTED AS C10
!       THERE ARE NO RADICAL SITES
!       (1ST NUMBER IS KETENE GROUP; 2ND NUMBER IS OOH GROUP)
!
!
!
!
!
!
!
!
!
!
!
!
!
!
!
! 2-METHYLDECANE
! 2-METHYLDECANE AND ITS CORRESPONDING ALKYL RADICALS;
! RADICAL SITE DENOTED BY LETTER
!
! ALL 2-METHYLDECENES AND ITS CORRESPONDING ALKENYL RADICALS;
! RADICAL SITE DENOTED BY LETTER
!
H+O2=O+OH    3.547E15 -0.406 1.66E4
    REV/1.027E13 -1.5E-2 -1.33E2/
O+H2=H+OH    5.08E4 2.67 6.292E3
    REV/2.637E4 2.651E0 4.88E3/
OH+H2=H+H2O    2.16E8 1.51 3.43E3
    REV/2.29E9 1.404E0 1.832E4/
O+H2O=2OH    2.97E6 2.02 1.34E4
    REV/1.454E5 2.107E0 -2.904E3/
H2+M=2H+M    4.577E19 -1.4 1.044E5
    H2/2.5/
    H2O/12.0/
    CO/1.9/
    CO2/3.8/
    REV/1.145E20 -1.676E0 8.2E2/
O2+M=2O+M    4.42E17 -0.634 1.189E5
    H2/2.5/
    H2O/12.0/
    CO/1.9/
    CO2/3.8/
    CH4/2.0/
    C2H6/3.0/
    REV/6.165E15 -5.0E-1 0.0E0/
OH+M=O+H+M    9.78E17 -0.743 1.021E5
    H2/2.5/
    H2O/12.0/
    CO/1.5/
    CO2/2.0/
    CH4/2.0/
    C2H6/3.0/
    REV/4.714E18 -1.0E0 0.0E0/
H2O+M=H+OH+M    1.907E23 -1.83 1.185E5
    H2/0.73/
    H2O/12.0/
    CH4/2.0/
    C2H6/3.0/
    REV/4.5E22 -2.0E0 0.0E0/
!TROE FALL-OFF REACTION
H+O2(+M)=HO2(+M)    1.475E12 0.6 0.0E0
    H2/1.3/
    H2O/14.0/
    CO/1.9/
    CO2/3.8/
    CH4/2.0/
    C2H6/3.0/
    LOW/3.482E16 -4.11E-1 -1.115E3/
    TROE/5.0E-1 1.0E-30 1.0E30 1.0E10/
HO2+H=H2+O2    1.66E13 0.0 8.23E2
    REV/3.166E12 3.48E-1 5.551E4/
HO2+H=2OH    7.079E13 0.0 2.95E2
    REV/2.028E10 7.2E-1 3.684E4/
HO2+O=OH+O2    3.25E13 0.0 0.0E0
    REV/3.217E12 3.29E-1 5.328E4/
HO2+OH=H2O+O2    1.973E10 0.962 -3.284E2
    REV/3.989E10 1.204E0 6.925E4/
H2O2+O2=2HO2    1.136E16 -0.347 4.973E4
    REV/1.03E14 0.0E0 1.104E4/
    DUP
H2O2+O2=2HO2    2.141E13 -0.347 3.728E4
    REV/1.94E11 0.0E0 -1.409E3/
    DUP
!TROE FALL-OFF REACTION
H2O2(+M)=2OH(+M)    2.951E14 0.0 4.843E4
    H2/2.5/
    H2O/12.0/
    CO/1.9/
    CO2/3.8/
    CH4/2.0/
    C2H6/3.0/
    LOW/1.202E17 0.0E0 4.55E4/
    TROE/5.0E-1 1.0E-30 1.0E30 1.0E10/
H2O2+H=H2O+OH    2.41E13 0.0 3.97E3
    REV/1.265E8 1.31E0 7.141E4/
H2O2+H=H2+HO2    2.15E10 1.0 6.0E3
    REV/3.716E7 1.695E0 2.2E4/
H2O2+O=OH+HO2    9.55E6 2.0 3.97E3
    REV/8.568E3 2.676E0 1.856E4/
H2O2+OH=H2O+HO2    2.0E12 0.0 4.272E2
    REV/3.665E10 5.89E-1 3.132E4/
    DUP
H2O2+OH=H2O+HO2    1.7E18 0.0 2.941E4
    REV/3.115E16 5.89E-1 6.03E4/
    DUP
!LINDEMANN FALL-OFF REACTION
CO+O(+M)=CO2(+M)    1.8E10 0.0 2.384E3
    H2/2.0/
    O2/6.0/
    H2O/6.0/
    CO/1.5/
    CO2/3.5/
    CH4/2.0/
    C2H6/3.0/
    LOW/1.35E24 -2.788E0 4.191E3/
CO+O2=CO2+O    1.05E12 0.0 4.254E4
    REV/8.035E15 -8.0E-1 5.123E4/
CO+OH=CO2+H    2.23E5 1.89 -1.158E3
    REV/5.896E11 6.99E-1 2.426E4/
CO+HO2=CO2+OH    3.01E13 0.0 2.3E4
    REV/2.28E16 -4.7E-1 8.497E4/
HCO+M=H+CO+M    4.75E11 0.66 1.487E4
    H2/2.0/
    H2O/12.0/
    CO/1.5/
    CO2/2.0/
    CH4/2.0/
    C2H6/3.0/
    REV/3.582E10 1.041E0 -4.573E2/
HCO+O2=CO+HO2    7.58E12 0.0 4.1E2
    REV/1.198E12 3.09E-1 3.395E4/
HCO+H=CO+H2    7.34E13 0.0 0.0E0
    REV/2.212E12 6.56E-1 8.823E4/
HCO+O=CO+OH    3.02E13 0.0 0.0E0
    REV/4.725E11 6.38E-1 8.682E4/
HCO+O=CO2+H    3.0E13 0.0 0.0E0
    REV/1.241E18 -5.53E-1 1.122E5/
HCO+OH=CO+H2O    1.02E14 0.0 0.0E0
    REV/3.259E13 5.51E-1 1.031E5/
HCO+CH3=CH4+CO    2.65E13 0.0 0.0E0
    REV/7.286E14 2.11E-1 8.977E4/
HCO+HO2=CH2O+O2    2.499E14 -0.061 1.392E4
    REV/8.07E15 0.0E0 5.342E4/
HCO+HO2=>CO2+H+OH    3.0E13 0.0 0.0E0
O2CHO=HCO+O2    9.959E15 -1.126 4.1E4
    REV/1.2E11 0.0E0 -1.1E3/
CH2O+O2CHO=HCO+HO2CHO    1.99E12 0.0 1.166E4
    REV/3.908E14 -9.09E-1 1.181E4/
!WJP ESTIMATE. REV/ 3.856E+08 1.532 -6.372E+03 /
HO2CHO=OCHO+OH    5.01E14 0.0 4.015E4
    REV/1.0E13 0.0E0 0.0E0/
OCHO+M=H+CO2+M    5.318E14 -0.353 1.758E4
    REV/7.5E13 0.0E0 2.9E4/
CH2O+CO=2HCO    9.186E13 0.37 7.304E4
    REV/1.8E13 0.0E0 0.0E0/
2HCO=>H2+2CO    3.0E12 0.0 0.0E0
!TROE FALL-OFF REACTION
HCO+H(+M)=CH2O(+M)    1.09E12 0.48 -2.6E2
    H2/2.0/
    H2O/6.0/
    CO/1.5/
    CO2/2.0/
    CH4/2.0/
    C2H6/3.0/
    LOW/1.35E24 -2.57E0 1.425E3/
    TROE/7.824E-1 2.71E2 2.755E3 6.57E3/
!TROE FALL-OFF REACTION
CO+H2(+M)=CH2O(+M)    4.3E7 1.5 7.96E4
    H2/2.0/
    H2O/6.0/
    CO/1.5/
    CO2/2.0/
    CH4/2.0/
    C2H6/3.0/
    LOW/5.07E27 -3.42E0 8.4348E4/
    TROE/9.32E-1 1.97E2 1.54E3 1.03E4/
CH2O+OH=HCO+H2O    7.82E7 1.63 -1.055E3
    REV/4.896E6 1.811E0 2.903E4/
CH2O+H=HCO+H2    5.74E7 1.9 2.74E3
    REV/3.39E5 2.187E0 1.793E4/
CH2O+O=HCO+OH    6.26E9 1.15 2.26E3
    REV/1.919E7 1.418E0 1.604E4/
CH2O+CH3=HCO+CH4    3.83E1 3.36 4.312E3
    REV/2.063E2 3.201E0 2.104E4/
CH2O+HO2=HCO+H2O2    7.1E-3 4.517 6.58E3
    REV/2.426E-2 4.108E0 5.769E3/
HOCH2O=CH2O+OH    2.056E21 -2.336 2.573E4
    REV/4.5E15 -1.1E0 0.0E0/
HOCH2O=HOCHO+H    1.0E14 0.0 1.49E4
    REV/1.123E15 -2.95E-1 1.15E4/
HOCHO=CO+H2O    2.45E12 0.0 6.047E4
    REV/2.255E3 2.093E0 5.289E4/
HOCHO=CO2+H2    2.95E9 0.0 4.852E4
    REV/6.772E5 1.008E0 5.147E4/
HOCHO=HCO+OH    3.471E22 -1.542 1.107E5
    REV/1.0E14 0.0E0 0.0E0/
HOCHO+O2=OCHO+HO2    4.101E12 -0.308 5.988E4
    REV/3.5E10 0.0E0 -3.275E3/
HOCHO+OH=>H2O+CO2+H    2.62E6 2.06 9.16E2
HOCHO+OH=>H2O+CO+OH    1.85E7 1.51 -9.62E2
! WJP: FWD ONLY.
HOCHO+H=>H2+CO2+H    4.24E6 2.1 4.868E3
!REV/ 0.000E+00 0.000 0.000E+00 /
HOCHO+H=>H2+CO+OH    6.03E13 -0.35 2.988E3
HOCHO+CH3=>CH4+CO+OH    3.9E-7 5.8 2.2E3
HOCHO+HO2=OCHO+H2O2    2.549E12 0.04 3.447E4
    REV/2.4E12 0.0E0 1.0E4/
! WJP: FWD ONLY.
HOCHO+HO2=>H2O2+CO+OH    1.0E12 0.0 1.192E4
!REV/ 0.000E+00 0.000 0.000E+00 /
! WJP: FWD ONLY.
HOCHO+O=>CO+2OH    1.77E18 -1.9 2.975E3
!REV/ 0.000E+00 0.000 0.000E+00 /
HOCHO+HCO=CH2O+OCHO    8.584E11 0.04 2.675E4
    REV/5.6E12 0.0E0 1.36E4/
!TROE FALL-OFF REACTION
CH3O(+M)=CH2O+H(+M)    6.8E13 0.0 2.617E4
    H2/2.0/
    H2O/6.0/
    CO/1.5/
    CO2/2.0/
    CH4/2.0/
    C2H6/3.0/
    LOW/1.867E25 -3.0E0 2.4307E4/
    TROE/9.0E-1 2.5E3 1.3E3 1.0E99/
CH3O+O2=CH2O+HO2    4.38E-19 9.5 -5.501E3
    REV/1.416E-20 9.816E0 2.108E4/
CH2O+CH3O=CH3OH+HCO    6.62E11 0.0 2.294E3
    REV/8.393E10 7.4E-2 1.771E4/
CH4+CH3O=CH3+CH3OH    6.119E2 2.867 8.248E3
    REV/1.44E1 3.1E0 6.935E3/
CH3O+CH3=CH2O+CH4    1.2E13 0.0 0.0E0
    REV/6.749E13 2.18E-1 8.281E4/
CH3O+H=CH2O+H2    2.0E13 0.0 0.0E0
    REV/1.233E11 6.64E-1 8.127E4/
CH3O+HO2=CH2O+H2O2    3.01E11 0.0 0.0E0
    REV/1.074E12 -3.1E-2 6.527E4/
!TROE FALL-OFF REACTION
CH2O+H(+M)=CH2OH(+M)    5.4E11 0.454 3.6E3
    H2/2.0/
    H2O/6.0/
    CO/1.5/
    CO2/2.0/
    CH4/2.0/
    C2H6/3.0/
    LOW/1.27E32 -4.82E0 6.53E3/
    TROE/7.187E-1 1.03E2 1.291E3 4.16E3/
CH2OH+O2=CH2O+HO2    1.51E15 -1.0 0.0E0
    REV/1.975E14 -5.8E-1 2.006E4/
    DUP
CH2OH+O2=CH2O+HO2    2.41E14 0.0 5.017E3
    REV/3.152E13 4.2E-1 2.508E4/
    DUP
CH2OH+H=CH2O+H2    6.0E12 0.0 0.0E0
    REV/1.497E11 7.68E-1 7.475E4/
CH2OH+HO2=CH2O+H2O2    1.2E13 0.0 0.0E0
    REV/1.732E14 7.3E-2 5.875E4/
CH2OH+HCO=2CH2O    1.8E14 0.0 0.0E0
    REV/7.602E14 4.81E-1 5.956E4/
CH2OH+CH3O=CH2O+CH3OH    2.4E13 0.0 0.0E0
    REV/1.285E13 5.55E-1 7.498E4/
CH2OH+CH2O=CH3OH+HCO    1.878E4 2.722 4.208E3
    REV/9.63E3 2.9E0 1.311E4/
OH+CH2OH=H2O+CH2O    2.4E13 0.0 0.0E0
    REV/6.347E12 6.62E-1 8.964E4/
O+CH2OH=OH+CH2O    4.2E13 0.0 0.0E0
    REV/5.438E11 7.49E-1 7.334E4/
CH2O+CH3OH=2CH2OH    6.498E12 0.659 6.846E4
    REV/3.0E12 0.0E0 0.0E0/
CH2OH+HO2=HOCH2O+OH    1.0E13 0.0 0.0E0
    REV/8.169E13 -2.4E-2 3.347E4/
!TROE FALL-OFF REACTION
CH3OH(+M)=CH3+OH(+M)    1.9E16 0.0 9.173E4
    LOW/2.95E44 -7.35E0 9.546E4/
    TROE/4.14E-1 2.79E2 5.459E3 1.0E10/
!TROE FALL-OFF REACTION
CH3OH(+M)=CH2OH+H(+M)    2.69E16 -0.08 9.894E4
    LOW/2.34E40 -6.33E0 1.031E5/
    TROE/7.73E-1 6.93E2 5.333E3 1.0E10/
CH3OH+H=CH3O+H2    3.6E12 0.0 6.095E3
    REV/1.677E11 2.12E-1 5.868E3/
CH3OH+H=CH2OH+H2    1.204E6 2.4 2.583E3
    REV/1.386E4 2.509E0 8.871E3/
CH3OH+O=CH2OH+OH    3.88E5 2.5 3.08E3
    REV/2.319E3 2.59E0 7.956E3/
CH3OH+OH=CH3O+H2O    5.13E5 2.13 2.45E3
    REV/2.534E5 2.237E0 1.712E4/
CH3OH+OH=CH2OH+H2O    1.44E6 2.0 -8.39E2
    REV/1.758E5 2.003E0 2.034E4/
CH3OH+O2=CH2OH+HO2    2.05E13 0.0 4.49E4
    REV/1.238E12 -2.39E-1 -3.501E3/
CH3OH+HO2=CH2OH+H2O2    1.08E4 2.55 1.053E4
    REV/7.195E4 1.963E0 8.19E2/
CH3OH+CH3=CH2OH+CH4    3.19E1 3.17 7.172E3
    REV/3.351E2 2.833E0 1.5E4/
CH3O+CH3OH=CH2OH+CH3OH    3.0E11 0.0 4.074E3
    REV/7.416E10 -1.04E-1 1.059E4/
CH3OH+CH2O=2CH3O    7.981E12 0.452 8.149E4
    REV/6.03E13 0.0E0 0.0E0/
!TROE FALL-OFF REACTION
CH3+H(+M)=CH4(+M)    1.27E16 -0.6 3.83E2
    H2/2.0/
    H2O/6.0/
    CO/1.5/
    CO2/2.0/
    CH4/2.0/
    C2H6/3.0/
    LOW/2.477E33 -4.76E0 2.444E3/
    TROE/7.83E-1 7.4E1 2.94E3 6.96E3/
CH4+H=CH3+H2    6.14E5 2.5 9.587E3
    REV/6.73E2 2.946E0 8.047E3/
CH4+OH=CH3+H2O    5.83E4 2.6 2.19E3
    REV/6.776E2 2.94E0 1.554E4/
CH4+O=CH3+OH    1.02E9 1.5 8.6E3
    REV/5.804E5 1.927E0 5.648E3/
CH4+HO2=CH3+H2O2    1.13E1 3.74 2.101E4
    REV/7.166E0 3.491E0 3.468E3/
CH4+CH2=2CH3    2.46E6 2.0 8.27E3
    REV/1.736E6 1.868E0 1.298E4/
CH3+OH=CH2O+H2    8.0E9 0.5 -1.755E3
    REV/1.066E12 3.22E-1 6.821E4/
CH3+OH=CH2(S)+H2O    4.508E17 -1.34 1.417E3
    REV/1.654E16 -8.55E-1 1.039E3/
CH3+OH=CH3O+H    6.943E7 1.343 1.12E4
    REV/1.5E12 5.0E-1 -1.1E2/
CH3+OH=CH2OH+H    3.09E7 1.596 4.506E3
    REV/1.65E11 6.5E-1 -2.84E2/
CH3+OH=CH2+H2O    5.6E7 1.6 5.42E3
    REV/9.224E5 2.072E0 1.406E4/
CH3+HO2=CH3O+OH    1.0E12 0.269 -6.875E2
    REV/6.19E12 1.47E-1 2.455E4/
CH3+HO2=CH4+O2    1.16E5 2.23 -3.022E3
    REV/2.018E7 2.132E0 5.321E4/
CH3+O=CH2O+H    5.54E13 0.05 -1.36E2
    REV/3.83E15 -1.47E-1 6.841E4/
CH3+O2=CH3O+O    7.546E12 0.0 2.832E4
    REV/4.718E14 -4.51E-1 2.88E2/
CH3+O2=CH2O+OH    2.641E0 3.283 8.105E3
    REV/5.285E-1 3.477E0 5.992E4/
!TROE FALL-OFF REACTION
CH3+O2(+M)=CH3O2(+M)    7.812E9 0.9 0.0E0
    LOW/6.85E24 -3.0E0 0.0E0/
    TROE/6.0E-1 1.0E3 7.0E1 1.7E3/
CH3O2+CH2O=CH3O2H+HCO    1.99E12 0.0 1.166E4
    REV/1.323E14 -8.53E-1 9.259E3/
CH4+CH3O2=CH3+CH3O2H    1.81E11 0.0 1.848E4
    REV/2.233E12 -6.94E-1 -6.55E2/
CH3OH+CH3O2=CH2OH+CH3O2H    1.81E12 0.0 1.371E4
    REV/2.346E14 -1.031E0 2.404E3/
CH3O2+CH3=2CH3O    5.08E12 0.0 -1.411E3
    REV/1.967E12 1.76E-1 2.807E4/
CH3O2+HO2=CH3O2H+O2    2.47E11 0.0 -1.57E3
    REV/5.302E14 -7.92E-1 3.552E4/
2CH3O2=>CH2O+CH3OH+O2    3.11E14 -1.61 -1.051E3
2CH3O2=>O2+2CH3O    1.4E16 -1.61 1.86E3
CH3O2+H=CH3O+OH    9.6E13 0.0 0.0E0
    REV/1.72E9 1.019E0 4.078E4/
CH3O2+O=CH3O+O2    3.6E13 0.0 0.0E0
    REV/2.229E11 6.28E-1 5.752E4/
CH3O2+OH=CH3OH+O2    6.0E13 0.0 0.0E0
    REV/1.536E13 4.34E-1 5.916E4/
CH3O2H=CH3O+OH    6.31E14 0.0 4.23E4
    REV/2.514E6 1.883E0 -2.875E3/
!BASED ON GRI MECH AND JETSURF REACTION SHOULD HAVE AN "M" IN IT: WJP
CH2(S)+M=CH2+M    1.0E13 0.0 0.0E0
    REV/4.488E12 -1.3E-2 9.02E3/
CH2(S)+CH4=2CH3    1.6E13 0.0 -5.7E2
    REV/5.067E12 -1.45E-1 1.316E4/
CH2(S)+O2=>CO+OH+H    7.0E13 0.0 0.0E0
CH2(S)+H2=CH3+H    7.0E13 0.0 0.0E0
    REV/2.022E16 -5.91E-1 1.527E4/
CH2(S)+H=CH2+H    3.0E13 0.0 0.0E0
    REV/1.346E13 -1.3E-2 9.02E3/
CH2(S)+H=CH+H2    3.0E13 0.0 0.0E0
    REV/6.948E13 -2.53E-1 1.248E4/
CH2(S)+O=>CO+2H    3.0E13 0.0 0.0E0
CH2(S)+OH=CH2O+H    3.0E13 0.0 0.0E0
    REV/1.154E18 -7.7E-1 8.523E4/
CH2(S)+CO2=CH2O+CO    3.0E12 0.0 0.0E0
    REV/4.366E10 4.21E-1 5.981E4/
!TROE FALL-OFF REACTION
CH2+H(+M)=CH3(+M)    2.5E16 -0.8 0.0E0
    H2/2.0/
    H2O/6.0/
    CO/1.5/
    CO2/2.0/
    CH4/2.0/
    C2H6/3.0/
    LOW/3.2E27 -3.14E0 1.23E3/
    TROE/6.8E-1 7.8E1 1.995E3 5.59E3/
CH2+O2=CH2O+O    2.4E12 0.0 1.5E3
    REV/5.955E14 -3.65E-1 6.098E4/
CH2+O2=>CO2+2H    5.8E12 0.0 1.5E3
CH2+O2=>CO+OH+H    5.0E12 0.0 1.5E3
CH2+O=>CO+2H    5.0E13 0.0 0.0E0
CH2+H=CH+H2    1.0E18 -1.56 0.0E0
    REV/5.16E18 -1.8E0 3.46E3/
    DUP
CH2+OH=CH+H2O    1.13E7 2.0 3.0E3
    REV/6.183E8 1.655E0 2.135E4/
CH+O2=HCO+O    3.3E13 0.0 0.0E0
    REV/9.371E12 1.61E-1 7.121E4/
CH+O=CO+H    5.7E13 0.0 0.0E0
    REV/2.774E15 0.0E0 1.76E5/
CH+OH=HCO+H    3.0E13 0.0 0.0E0
    REV/5.069E14 0.0E0 8.811E4/
CH2+H=CH+H2    2.7E11 0.67 2.57E4
    REV/1.897E11 6.7E-1 2.873E4/
    DUP
CH+H2O=H+CH2O    1.713E13 0.0 -7.55E2
    REV/8.372E14 0.0E0 5.752E4/
CH+CO2=HCO+CO    1.7E12 0.0 6.85E2
    REV/2.565E11 0.0E0 6.646E4/
!TROE FALL-OFF REACTION
2CH3(+M)=C2H6(+M)    9.214E16 -1.17 6.358E2
    H2/2.0/
    H2O/6.0/
    CO/1.5/
    CO2/2.0/
    CH4/2.0/
    C2H6/3.0/
    LOW/1.135E36 -5.246E0 1.705E3/
    TROE/4.05E-1 1.12E3 6.96E1 1.0E10/
!TROE FALL-OFF REACTION
C2H5+H(+M)=C2H6(+M)    5.21E17 -0.99 1.58E3
    H2/2.0/
    H2O/6.0/
    CO/1.5/
    CO2/2.0/
    CH4/2.0/
    C2H6/3.0/
    LOW/1.99E41 -7.08E0 6.685E3/
    TROE/8.42E-1 1.25E2 2.219E3 6.882E3/
C2H6+H=C2H5+H2    1.15E8 1.9 7.53E3
    REV/1.062E4 2.582E0 9.76E3/
C2H6+O=C2H5+OH    3.55E6 2.4 5.83E3
    REV/1.702E2 3.063E0 6.648E3/
C2H6+OH=C2H5+H2O    1.48E7 1.9 9.5E2
    REV/1.45E4 2.476E0 1.807E4/
C2H6+O2=C2H5+HO2    6.03E13 0.0 5.187E4
    REV/2.921E10 3.34E-1 -5.93E2/
C2H6+CH3=C2H5+CH4    1.51E-7 6.0 6.047E3
    REV/1.273E-8 6.236E0 9.817E3/
C2H6+HO2=C2H5+H2O2    3.46E1 3.61 1.692E4
    REV/1.849E0 3.597E0 3.151E3/
C2H6+CH3O2=C2H5+CH3O2H    1.94E1 3.64 1.71E4
    REV/2.017E1 3.182E0 1.734E3/
C2H6+CH3O=C2H5+CH3OH    2.41E11 0.0 7.09E3
    REV/4.779E8 4.69E-1 9.547E3/
C2H6+CH=C2H5+CH2    1.1E14 0.0 -2.6E2
    REV/1.969E9 9.21E-1 -1.49E3/
CH2(S)+C2H6=CH3+C2H5    1.2E14 0.0 0.0E0
    REV/3.203E12 9.1E-2 1.75E4/
!TROE FALL-OFF REACTION
C2H4+H(+M)=C2H5(+M)    1.081E12 0.454 1.822E3
    H2/2.0/
    H2O/6.0/
    CO/1.5/
    CO2/2.0/
    CH4/2.0/
    C2H6/3.0/
    LOW/1.2E42 -7.62E0 6.97E3/
    TROE/9.75E-1 2.1E2 9.84E2 4.374E3/
H2+CH3O2=H+CH3O2H    1.5E14 0.0 2.603E4
    REV/1.688E18 -1.14E0 8.434E3/
H2+C2H5O2=H+C2H5O2H    1.5E14 0.0 2.603E4
    REV/1.691E18 -1.14E0 8.438E3/
C2H5+C2H3=2C2H4    6.859E11 0.11 -4.3E3
    REV/4.82E14 0.0E0 7.153E4/
CH3+C2H5=CH4+C2H4    1.18E4 2.45 -2.921E3
    REV/2.39E6 2.4E0 6.669E4/
C2H5+H=2CH3    9.69E13 0.0 2.2E2
    REV/2.029E9 1.028E0 1.051E4/
C2H5+H=C2H4+H2    2.0E12 0.0 0.0E0
    REV/4.44E11 3.96E-1 6.807E4/
C2H5+O=CH3CHO+H    1.1E14 0.0 0.0E0
    REV/1.033E17 -5.0E-1 7.742E4/
C2H5+HO2=C2H5O+OH    1.1E13 0.0 0.0E0
    REV/9.68E15 -7.23E-1 2.765E4/
CH3O2+C2H5=CH3O+C2H5O    8.0E12 0.0 -1.0E3
    REV/4.404E14 -4.25E-1 3.089E4/
C2H5O+O2=CH3CHO+HO2    4.28E10 0.0 1.097E3
    REV/1.322E8 6.15E-1 3.413E4/
C2H5O=CH3+CH2O    1.321E20 -2.018 2.075E4
    REV/3.0E11 0.0E0 6.336E3/
C2H5O=CH3CHO+H    5.428E15 -0.687 2.223E4
    REV/8.0E12 0.0E0 6.4E3/
C2H5O2=C2H5+O2    1.312E62 -14.784 4.918E4
    REV/2.876E56 -1.382E1 1.462E4/
C2H5O2+CH2O=C2H5O2H+HCO    1.99E12 0.0 1.166E4
    REV/1.325E14 -8.53E-1 9.263E3/
CH4+C2H5O2=CH3+C2H5O2H    1.81E11 0.0 1.848E4
    REV/2.237E12 -6.94E-1 -6.51E2/
CH3OH+C2H5O2=CH2OH+C2H5O2H    1.81E12 0.0 1.371E4
    REV/2.35E14 -1.031E0 2.408E3/
C2H5O2+HO2=C2H5O2H+O2    1.75E10 0.0 -3.275E3
    REV/3.763E13 -7.92E-1 3.382E4/
C2H6+C2H5O2=C2H5+C2H5O2H    8.6E0 3.76 1.72E4
    REV/8.957E0 3.302E0 1.838E3/
C2H5O2H=C2H5O+OH    6.31E14 0.0 4.23E4
    REV/5.661E8 1.033E0 -1.705E3/
C2H4O2H=C2H5+O2    4.374E47 -12.115 3.102E4
    REV/1.814E45 -1.15E1 1.46E4/
C2H5+O2=C2H4+HO2    7.561E14 -1.01 4.749E3
    REV/8.802E14 -9.62E-1 1.813E4/
    DUP
C2H5+O2=C2H4+HO2    4.0E-1 3.88 1.362E4
    REV/4.656E-1 3.928E0 2.7E4/
    DUP
C2H5+O2=C2H4O1-2+OH    1.626E11 -0.31 6.15E3
    REV/3.633E13 -6.26E-1 3.984E4/
C2H5+O2=CH3CHO+OH    8.265E2 2.41 5.285E3
    REV/2.247E3 2.301E0 6.597E4/
C2H5O2=C2H4O2H    2.276E39 -8.479 4.517E4
    REV/1.203E36 -8.13E0 2.702E4/
C2H5O2=CH3CHO+OH    2.52E41 -10.2 4.371E4
    REV/1.502E36 -9.345E0 6.984E4/
C2H5O2=C2H4+HO2    1.815E38 -8.45 3.789E4
    REV/4.632E32 -7.438E0 1.67E4/
C2H5O2=C2H4O1-2+OH    4.0E43 -10.46 4.558E4
    REV/1.959E40 -9.812E0 4.471E4/
C2H4O2H=C2H4O1-2+OH    8.848E30 -6.08 2.066E4
    REV/8.199E30 -5.781E0 3.793E4/
C2H4O2H=C2H4+HO2    3.98E34 -7.25 2.325E4
    REV/1.922E32 -6.587E0 2.021E4/
C2H4O2H=CH3CHO+OH    1.188E34 -9.02 2.921E4
    REV/1.339E32 -8.514E0 7.348E4/
C2H4O1-2=CH3+HCO    3.63E13 0.0 5.72E4
    REV/1.006E4 1.549E0 -2.75E3/
C2H4O1-2=CH3CHO    7.407E12 0.0 5.38E4
    REV/9.013E10 2.07E-1 8.08E4/
C2H4O1-2+OH=C2H3O1-2+H2O    1.78E13 0.0 3.61E3
    REV/1.347E10 6.93E-1 2.474E4/
C2H4O1-2+H=C2H3O1-2+H2    8.0E13 0.0 9.68E3
    REV/5.71E9 7.99E-1 1.592E4/
C2H4O1-2+HO2=C2H3O1-2+H2O2    1.13E13 0.0 3.043E4
    REV/4.666E11 1.04E-1 2.067E4/
C2H4O1-2+CH3O2=C2H3O1-2+CH3O2H    1.13E13 0.0 3.043E4
    REV/9.078E12 -3.41E-1 1.907E4/
C2H4O1-2+C2H5O2=C2H3O1-2+C2H5O2H    1.13E13 0.0 3.043E4
    REV/9.093E12 -3.41E-1 1.908E4/
C2H4O1-2+CH3=C2H3O1-2+CH4    1.07E12 0.0 1.183E4
    REV/6.967E10 3.53E-1 1.961E4/
C2H4O1-2+CH3O=C2H3O1-2+CH3OH    1.2E11 0.0 6.75E3
    REV/1.839E8 5.86E-1 1.322E4/
C2H3O1-2=CH3CO    8.5E14 0.0 1.4E4
    REV/1.002E14 4.1E-2 4.871E4/
C2H3O1-2=CH2CHO    1.0E14 0.0 1.4E4
    REV/1.245E15 -3.75E-1 4.401E4/
CH3CHO=CH3+HCO    7.687E20 -1.342 8.695E4
    REV/1.75E13 0.0E0 0.0E0/
CH3CHO+H=CH3CO+H2    2.37E13 0.0 3.642E3
    REV/1.639E10 6.33E-1 1.76E4/
CH3CHO+O=CH3CO+OH    5.94E12 0.0 1.868E3
    REV/2.133E9 6.14E-1 1.441E4/
CH3CHO+OH=CH3CO+H2O    3.37E12 0.0 -6.19E2
    REV/2.472E10 5.27E-1 2.823E4/
CH3CHO+O2=CH3CO+HO2    3.01E13 0.0 3.915E4
    REV/1.092E11 2.85E-1 -1.588E3/
CH3CHO+CH3=CH3CO+CH4    7.08E-4 4.58 1.966E3
    REV/4.468E-4 4.767E0 1.746E4/
CH3CHO+HO2=CH3CO+H2O2    3.01E12 0.0 1.192E4
    REV/1.205E12 -6.2E-2 9.877E3/
CH3O2+CH3CHO=CH3O2H+CH3CO    3.01E12 0.0 1.192E4
    REV/2.344E13 -5.07E-1 8.282E3/
CH3CHO+CH3CO3=CH3CO+CH3CO3H    3.01E12 0.0 1.192E4
    REV/1.922E12 -1.0E-2 1.265E4/
CH3CHO+OH=CH3+HOCHO    3.0E15 -1.076 0.0E0
    REV/2.371E16 -1.277E0 2.375E4/
CH3CHO+OH=CH2CHO+H2O    1.72E5 2.4 8.15E2
    REV/1.332E5 2.511E0 2.495E4/
!LINDEMANN FALL-OFF REACTION
CH3CO(+M)=CH3+CO(+M)    3.0E12 0.0 1.672E4
    LOW/1.2E15 0.0E0 1.2518E4/
CH3CO+H=CH2CO+H2    2.0E13 0.0 0.0E0
    REV/1.037E13 2.01E-1 6.056E4/
CH3CO+O=CH2CO+OH    2.0E13 0.0 0.0E0
    REV/5.381E12 1.82E-1 5.914E4/
CH3CO+CH3=CH2CO+CH4    5.0E13 0.0 0.0E0
    REV/2.364E16 -2.45E-1 6.21E4/
CH3CO3=CH3CO+O2    6.863E19 -1.949 3.853E4
    REV/1.2E11 0.0E0 -1.1E3/
CH3CO3+HO2=CH3CO3H+O2    1.75E10 0.0 -3.275E3
    REV/3.08E12 -2.94E-1 3.818E4/
H2O2+CH3CO3=HO2+CH3CO3H    2.41E12 0.0 9.936E3
    REV/3.845E12 5.3E-2 1.271E4/
CH4+CH3CO3=CH3+CH3CO3H    1.81E11 0.0 1.848E4
    REV/1.831E11 -1.96E-1 3.711E3/
CH2O+CH3CO3=HCO+CH3CO3H    1.99E12 0.0 1.166E4
    REV/1.085E13 -3.56E-1 1.362E4/
C2H6+CH3CO3=C2H5+CH3CO3H    1.7E13 0.0 2.046E4
    REV/1.45E12 4.0E-2 9.46E3/
CH3CO3H=CH3CO2+OH    5.01E14 0.0 4.015E4
    REV/3.618E7 1.761E0 1.338E3/
CH3CO2+M=CH3+CO2+M    4.4E15 0.0 1.05E4
    REV/4.548E8 1.378E0 1.752E4/
CH2CHO=CH2CO+H    4.071E15 -0.342 5.06E4
    REV/5.0E13 0.0E0 1.23E4/
CH2CHO+O2=>CH2O+CO+OH    8.95E13 -0.6 1.012E4
!TROE FALL-OFF REACTION
CH2+CO(+M)=CH2CO(+M)    8.1E11 0.0 0.0E0
    H2/2.0/
    H2O/6.0/
    CO/1.5/
    CO2/2.0/
    CH4/2.0/
    C2H6/3.0/
    LOW/2.69E33 -5.11E0 7.095E3/
    TROE/5.907E-1 2.75E2 1.226E3 5.185E3/
CH2CO+H=CH3+CO    1.1E13 0.0 3.4E3
    REV/2.4E12 0.0E0 4.02E4/
CH2CO+H=HCCO+H2    2.0E14 0.0 8.0E3
    REV/1.434E11 4.7E-1 4.52E3/
CH2CO+O=CH2+CO2    1.75E12 0.0 1.35E3
    REV/2.854E9 8.09E-1 4.944E4/
CH2CO+O=HCCO+OH    1.0E13 0.0 8.0E3
    REV/3.723E9 4.52E-1 3.108E3/
CH2CO+OH=HCCO+H2O    1.0E13 0.0 2.0E3
    REV/7.604E10 3.65E-1 1.341E4/
CH2CO+OH=CH2OH+CO    2.0E12 0.0 -1.01E3
    REV/8.17E9 4.94E-1 2.453E4/
CH2(S)+CH2CO=C2H4+CO    1.6E14 0.0 0.0E0
    REV/3.75E14 2.17E-1 1.034E5/
HCCO+OH=>H2+2CO    1.0E14 0.0 0.0E0
H+HCCO=CH2(S)+CO    1.1E13 0.0 0.0E0
    REV/4.061E7 1.561E0 1.854E4/
HCCO+O=>H+2CO    8.0E13 0.0 0.0E0
HCCO+O2=>OH+2CO    4.2E10 0.0 8.5E2
!!! REV/ 1.391E+11 1.033 -1.372E+04 /  !WJP: REV RATE FROM THERMO ABOVE COLLISIONAL
HCCO+M=CH+CO+M    6.5E15 0.0 5.882E4
    REV/7.6E22 -1.9E0 0.0E0/
CH+CH2O=H+CH2CO    9.46E13 0.0 -5.15E2
    REV/1.623E15 0.0E0 6.906E4/
CH+HCCO=CO+C2H2    5.0E13 0.0 0.0E0
    REV/1.721E17 0.0E0 1.646E5/
!TROE FALL-OFF REACTION
C2H3+H(+M)=C2H4(+M)    1.36E14 0.173 6.6E2
    H2/2.0/
    H2O/6.0/
    CO/1.5/
    CO2/2.0/
    CH4/2.0/
    C2H6/3.0/
    LOW/1.4E30 -3.86E0 3.32E3/
    TROE/7.82E-1 2.075E2 2.663E3 6.095E3/
!TROE FALL-OFF REACTION
C2H4(+M)=C2H2+H2(+M)    8.0E12 0.44 8.877E4
    H2/2.0/
    H2O/6.0/
    CO/1.5/
    CO2/2.0/
    CH4/2.0/
    C2H6/3.0/
    LOW/1.58E51 -9.3E0 9.78E4/
    TROE/7.35E-1 1.8E2 1.035E3 5.417E3/
C2H4+H=C2H3+H2    5.07E7 1.93 1.295E4
    REV/1.602E4 2.436E0 5.19E3/
C2H4+O=CH3+HCO    8.564E6 1.88 1.83E2
    REV/3.297E2 2.602E0 2.614E4/
C2H4+O=CH2CHO+H    4.986E6 1.88 1.83E2
    REV/1.541E9 1.201E0 1.878E4/
C2H4+OH=C2H3+H2O    1.8E6 2.0 2.5E3
    REV/6.029E3 2.4E0 9.632E3/
C2H4+CH3=C2H3+CH4    6.62E0 3.7 9.5E3
    REV/1.908E0 3.76E0 3.28E3/
! WJP:  KR FROM THERMO TOO HIGH AT 300K.  LOWERED TO 3.E13 FROM HTTP://KINETICS.NIST.GOV/KINETICS/DETAIL?ID=1986TSA/HAM1087:195
C2H4+O2=C2H3+HO2    4.0E13 0.0 5.82E4
    REV/2.0E10 1.58E-1 -4.249E3/
!REV/ 6.626E+10 0.158 -4.249E+03 /
C2H4+CH3O=C2H3+CH3OH    1.2E11 0.0 6.75E3
!REV/ 8.138E+08 0.293 -7.830E+02 /
!C2H4+CH3O2(=)C2H3+CH3O2H 2.230E+12 0.000 1.719E+04
!REV/ 7.929E+12 -0.634 -8.167E+03 /
! C2H3+CH3O2H=C2H4+CH3O2 2.017E+01 3.18 1.734E+03 !WJP ANALOGOUS TO C2H5+CH3O2H
!WJP: FROM REVERSE RATE ABOVE AND THERMO
C2H4+CH3O2=C2H3+CH3O2H    8.59E0 3.754 2.7132E4
!WJP: ANALOGOUS TO C2H4+CH3O2
C2H4+C2H5O2=C2H3+C2H5O2H    8.59E0 3.754 2.7132E4
!C2H4+C2H5O2(=)C2H3+C2H5O2H 2.230E+12 0.000 1.719E+04
!REV/ 7.943E+12 -0.634 -8.163E+03 /
!C2H4+CH3CO3(=)C2H3+CH3CO3H 1.130E+13 0.000 3.043E+04
!WJP: ANALOGOUS TO C2H4+CH3O2
C2H4+CH3CO3=C2H3+CH3CO3H    8.59E0 3.754 2.7132E4
!REV/ 3.295E+12 -0.136 9.440E+03 /
C2H4+CH3O2=C2H4O1-2+CH3O    2.82E12 0.0 1.711E4
    REV/3.385E13 -6.5E-2 4.166E4/
C2H4+C2H5O2=C2H4O1-2+C2H5O    2.82E12 0.0 1.711E4
    REV/7.638E15 -9.16E-1 4.283E4/
C2H4+HO2=C2H4O1-2+OH    2.23E12 0.0 1.719E4
    REV/4.28E14 -3.64E-1 3.75E4/
CH+CH4=C2H4+H    6.0E13 0.0 0.0E0
    REV/3.573E14 0.0E0 5.548E4/
CH2(S)+CH3=C2H4+H    2.0E13 0.0 0.0E0
    REV/6.128E19 -1.223E0 7.305E4/
!TROE FALL-OFF REACTION
C2H2+H(+M)=C2H3(+M)    5.6E12 0.0 2.4E3
    H2/2.0/
    H2O/6.0/
    CO/1.5/
    CO2/2.0/
    CH4/2.0/
    C2H6/3.0/
    LOW/3.8E40 -7.27E0 7.22E3/
    TROE/7.51E-1 9.85E1 1.302E3 4.167E3/
C2H3+O2=C2H2+HO2    2.12E-6 6.0 9.484E3
    REV/1.087E-5 5.905E0 2.403E4/
C2H3+O2=CH2O+HCO    8.5E28 -5.312 6.5E3
    REV/3.994E27 -4.883E0 9.345E4/
C2H3+O2=CH2CHO+O    5.5E14 -0.611 5.26E3
    REV/3.0E18 -1.386E0 1.63E4/
CH3+C2H3=CH4+C2H2    3.92E11 0.0 0.0E0
    REV/3.497E14 -1.93E-1 7.078E4/
C2H3+H=C2H2+H2    9.64E13 0.0 0.0E0
    REV/9.427E13 2.53E-1 6.924E4/
C2H3+OH=C2H2+H2O    5.0E12 0.0 0.0E0
    REV/5.184E13 1.47E-1 8.413E4/
!TROE FALL-OFF REACTION
C2H+H(+M)=C2H2(+M)    1.0E17 0.0 0.0E0
    H2/2.0/
    H2O/6.0/
    CO/1.5/
    CO2/2.0/
    CH4/2.0/
    C2H6/3.0/
    LOW/3.75E33 -4.8E0 1.9E3/
    TROE/6.46E-1 1.32E2 1.315E3 5.566E3/
C2H2+O2=HCCO+OH    2.0E8 1.5 3.01E4
    REV/2.039E6 1.541E0 3.227E4/
!WJP CORRECT REVERSE RATE.  IT IS 20 TIMES COLLISIONAL AT 300K
O+C2H2=C2H+OH    4.6E19 -1.4 2.895E4
    REV/9.0E13 0.0E0 0.0E0/
!REV/ 3.023E+15 -0.604 -1.782E+03 /
C2H2+O=CH2+CO    6.94E6 2.0 1.9E3
    REV/4.05E1 3.198E0 4.836E4/
C2H2+O=HCCO+H    1.35E7 2.0 1.9E3
    REV/4.755E7 1.65E0 2.08E4/
C2H2+OH=C2H+H2O    3.37E7 2.0 1.4E4
    REV/4.524E4 2.709E0 -4.28E2/
C2H2+OH=CH2CO+H    3.236E13 0.0 1.2E4
    REV/3.061E17 -8.02E-1 3.579E4/
C2H2+OH=CH3+CO    4.83E-4 4.0 -2.0E3
    REV/3.495E-6 4.638E0 5.212E4/
OH+C2H2=H+HCCOH    5.04E5 2.3 1.35E4
    REV/3.852E9 1.436E0 4.382E3/
H+HCCOH=H+CH2CO    1.0E13 0.0 0.0E0
    REV/9.299E13 -2.9E-1 3.111E4/
!TROE FALL-OFF REACTION
C2H5OH(+M)=CH2OH+CH3(+M)    2.0E23 -1.68 9.64E4
    H2/2.0/
    H2O/5.0/
    CO/2.0/
    CO2/3.0/
    LOW/3.11E85 -1.884E1 1.131E5/
    TROE/5.0E-1 5.5E2 8.25E2 6.1E3/
!TROE FALL-OFF REACTION
C2H5OH(+M)=C2H5+OH(+M)    2.4E23 -1.62 9.954E4
    H2/2.0/
    H2O/5.0/
    CO/2.0/
    CO2/3.0/
    LOW/5.11E85 -1.88E1 1.1877E5/
    TROE/5.0E-1 6.5E2 8.0E2 1.0E15/
!TROE FALL-OFF REACTION
C2H5OH(+M)=C2H4+H2O(+M)    1.32E5 2.52 6.066E4
    H2O/5.0/
    LOW/3.09E55 -1.092E1 6.2644E4/
    TROE/8.97E-1 1.0E10 1.0E0 5.0E9/
!TROE FALL-OFF REACTION
C2H5OH(+M)=CH3CHO+H2(+M)    7.24E11 0.095 9.101E4
    H2O/5.0/
    LOW/4.46E87 -1.942E1 1.1558E5/
    TROE/9.0E-1 9.0E2 1.1E3 3.5E3/
C2H5OH+O2=SC2H4OH+HO2    1.5E13 0.0 5.015E4
    REV/1.946E11 8.9E-2 4.879E3/
C2H5OH+OH=SC2H4OH+H2O    5.56E10 0.5 -3.8E2
    REV/1.458E9 8.31E-1 2.393E4/
C2H5OH+OH=C2H5O+H2O    1.5E10 0.8 2.534E3
    REV/7.32E9 9.06E-1 1.721E4/
C2H5OH+H=SC2H4OH+H2    1.79E5 2.53 3.42E3
    REV/4.429E2 2.967E0 1.284E4/
C2H5OH+H=C2H5O+H2    5.36E4 2.53 4.405E3
    REV/2.467E3 2.742E0 4.188E3/
C2H5OH+HO2=SC2H4OH+H2O2    6.0E12 0.0 1.6E4
    REV/8.589E12 -2.58E-1 9.419E3/
C2H5OH+HO2=C2H5O+H2O2    2.5E12 0.0 2.4E4
    REV/6.658E13 -4.83E-1 7.782E3/
C2H5OH+CH3O2=SC2H4OH+CH3O2H    8.2E3 2.55 1.075E4
    REV/2.284E5 1.847E0 2.574E3/
C2H5OH+CH3O2=C2H5O+CH3O2H    2.5E12 0.0 2.4E4
    REV/1.295E15 -9.27E-1 6.187E3/
C2H5OH+O=SC2H4OH+OH    1.45E5 2.47 8.76E2
    REV/1.862E2 2.888E0 8.884E3/
C2H5OH+O=C2H5O+OH    1.46E-3 4.73 1.727E3
    REV/3.488E-5 4.924E0 9.8E1/
C2H5OH+CH3=SC2H4OH+CH4    1.993E1 3.37 7.634E3
    REV/4.498E1 3.361E0 1.859E4/
C2H5OH+CH3=C2H5O+CH4    2.035E0 3.57 7.721E3
    REV/8.545E1 3.336E0 9.044E3/
C2H5OH+C2H5=SC2H4OH+C2H6    5.0E10 0.0 1.04E4
    REV/6.995E10 0.0E0 2.399E0/
SC2H4OH+M=CH3CHO+H+M    1.0E14 0.0 2.5E4
    REV/2.742E12 4.62E-1 -4.7E2/
SC2H4OH+O2=CH3CHO+HO2    3.81E6 2.0 1.641E3
    REV/2.19E5 2.39E0 2.504E4/
CH3COCH2=CH2CO+CH3    1.0E14 0.0 3.1E4
    REV/1.0E11 0.0E0 6.0E3/
CH3COCH2O2=CH3COCH2+O2    2.021E15 -0.956 2.446E4
    REV/1.2E11 0.0E0 -1.1E3/
CH2O+CH3COCH2O2=HCO+CH3COCH2O2H    1.288E11 0.0 9.0E3
    REV/2.512E10 0.0E0 1.01E4/
HO2+CH3COCH2O2=>CH3COCH2O2H+O2    1.0E12 0.0 0.0E0
! WJP: EST. (KR FROM THERMO ABOVE COLLISIONAL.)
CH3COCH2O2H=CH3COCH2O+OH    1.0E16 0.0 4.3E4
    REV/1.0E15 -8.0E-1 0.0E0/
CH3COCH2O=CH3CO+CH2O    3.732E20 -2.176 1.726E4
    REV/1.0E11 0.0E0 1.19E4/
C2H3CHO=C2H3+HCO    2.003E24 -2.135 1.034E5
    REV/1.81E13 0.0E0 0.0E0/
C2H3CHO+H=C2H3CO+H2    1.34E13 0.0 3.3E3
    REV/3.311E10 6.13E-1 2.268E4/
C2H3CHO+O=C2H3CO+OH    5.94E12 0.0 1.868E3
    REV/7.618E9 5.94E-1 1.984E4/
C2H3CHO+OH=C2H3CO+H2O    9.24E6 1.5 -9.62E2
    REV/2.42E5 2.007E0 3.331E4/
C2H3CHO+O2=C2H3CO+HO2    1.005E13 0.0 4.07E4
    REV/1.302E11 2.65E-1 5.391E3/
C2H3CHO+HO2=C2H3CO+H2O2    3.01E12 0.0 1.192E4
    REV/4.303E12 -8.2E-2 1.53E4/
C2H3CHO+CH3=C2H3CO+CH4    2.608E6 1.78 5.911E3
    REV/5.878E6 1.947E0 2.683E4/
C2H3CHO+C2H3=C2H3CO+C2H4    1.74E12 0.0 8.44E3
    REV/1.0E13 0.0E0 2.8E4/
C2H3CHO+CH3O=C2H3CO+CH3OH    1.0E12 0.0 3.3E3
    REV/5.304E10 4.01E-1 2.291E4/
C2H3CHO+CH3O2=C2H3CO+CH3O2H    3.01E12 0.0 1.192E4
    REV/8.371E13 -5.27E-1 1.371E4/
C2H3CO=C2H3+CO    1.37E21 -2.179 3.941E4
    REV/1.51E11 0.0E0 4.81E3/
C2H5CHO=C2H5+HCO    1.496E27 -3.205 8.704E4
    REV/1.81E13 0.0E0 0.0E0/
C2H5CHO+H=C2H5CO+H2    4.0E13 0.0 4.2E3
    REV/2.377E10 6.54E-1 1.813E4/
C2H5CHO+O=C2H5CO+OH    5.0E12 0.0 1.79E3
    REV/1.542E9 6.36E-1 1.431E4/
C2H5CHO+OH=C2H5CO+H2O    2.69E10 0.76 -3.4E2
    REV/1.695E8 1.308E0 2.848E4/
C2H5CHO+CH3=C2H5CO+CH4    2.608E6 1.78 5.911E3
    REV/1.414E6 1.988E0 2.138E4/
C2H5CHO+HO2=C2H5CO+H2O2    2.8E12 0.0 1.36E4
    REV/9.626E11 -4.1E-2 1.153E4/
C2H5CHO+CH3O=C2H5CO+CH3OH    1.0E12 0.0 3.3E3
    REV/1.276E10 4.42E-1 1.746E4/
C2H5CHO+CH3O2=C2H5CO+CH3O2H    3.01E12 0.0 1.192E4
    REV/2.013E13 -4.85E-1 8.26E3/
C2H5CHO+C2H5=C2H5CO+C2H6    1.0E12 0.0 8.0E3
    REV/6.432E12 -2.8E-2 1.97E4/
C2H5CHO+C2H5O=C2H5CO+C2H5OH    6.026E11 0.0 3.3E3
    REV/3.02E11 0.0E0 1.816E4/
C2H5CHO+C2H5O2=C2H5CO+C2H5O2H    3.01E12 0.0 1.192E4
    REV/2.017E13 -4.86E-1 8.264E3/
C2H5CHO+O2=C2H5CO+HO2    1.005E13 0.0 4.07E4
    REV/3.131E10 3.06E-1 -5.8E1/
C2H5CHO+CH3CO3=C2H5CO+CH3CO3H    3.01E12 0.0 1.192E4
    REV/1.651E12 1.2E-2 1.263E4/
C2H5CHO+C2H3=C2H5CO+C2H4    1.7E12 0.0 8.44E3
    REV/3.198E12 1.48E-1 3.013E4/
C2H5CO=C2H5+CO    2.46E23 -3.208 1.755E4
    REV/1.51E11 0.0E0 4.81E3/
CH3OCO=CH3+CO2    3.59E14 -0.172 1.601E4
    REV/4.76E7 1.54E0 3.47E4/
CH3OCO=CH3O+CO    1.431E15 -0.041 2.377E4
    REV/1.55E6 2.02E0 5.73E3/
!TROE FALL-OFF REACTION
C3H8(+M)=CH3+C2H5(+M)    1.29E37 -5.84 9.738E4
    H2/2.0/
    H2O/6.0/
    CO/1.5/
    CO2/2.0/
    CH4/2.0/
    C2H6/3.0/
    LOW/5.64E74 -1.574E1 9.8714E4/
    TROE/3.1E-1 5.0E1 3.0E3 9.0E3/
C3H8=NC3H7+H    3.75E17 -0.357 1.012E5
    REV/1.0E14 0.0E0 0.0E0/
C3H8=IC3H7+H    2.377E18 -0.671 9.868E4
    REV/1.0E14 0.0E0 0.0E0/
C3H8+O2=IC3H7+HO2    2.0E13 0.0 4.964E4
    REV/1.764E9 5.99E-1 -1.69E2/
C3H8+O2=NC3H7+HO2    6.0E13 0.0 5.229E4
    REV/3.354E10 2.85E-1 -5.9E1/
H+C3H8=H2+IC3H7    1.17E7 2.4 4.471E3
    REV/2.186E1 3.347E0 9.351E3/
H+C3H8=H2+NC3H7    1.33E6 2.54 6.756E3
    REV/1.418E2 3.173E0 9.096E3/
C3H8+O=IC3H7+OH    5.49E5 2.5 3.14E3
    REV/4.793E0 3.428E0 6.608E3/
C3H8+O=NC3H7+OH    3.71E6 2.4 5.505E3
    REV/2.053E2 3.014E0 6.433E3/
C3H8+OH=NC3H7+H2O    1.054E10 0.97 1.586E3
    REV/1.191E7 1.497E0 1.882E4/
C3H8+OH=IC3H7+H2O    4.67E7 1.61 -3.5E1
    REV/8.327E3 2.451E0 1.974E4/
C3H8+HO2=IC3H7+H2O2    5.88E4 2.5 1.486E4
    REV/5.721E2 2.752E0 3.742E3/
C3H8+HO2=NC3H7+H2O2    8.1E4 2.5 1.669E4
    REV/4.995E3 2.438E0 3.03E3/
CH3+C3H8=CH4+IC3H7    6.4E4 2.17 7.52E3
    REV/9.819E2 2.671E0 1.394E4/
CH3+C3H8=CH4+NC3H7    9.04E-1 3.65 7.154E3
    REV/8.791E-2 3.837E0 1.103E4/
IC3H7+C3H8=NC3H7+C3H8    3.0E10 0.0 1.29E4
    REV/3.0E10 0.0E0 1.29E4/
C2H3+C3H8=C2H4+IC3H7    1.0E11 0.0 1.04E4
    REV/1.31E11 0.0E0 1.78E4/
C2H3+C3H8=C2H4+NC3H7    1.0E11 0.0 1.04E4
    REV/1.31E11 0.0E0 1.78E4/
C2H5+C3H8=C2H6+IC3H7    1.0E11 0.0 1.04E4
    REV/3.63E10 0.0E0 9.934E3/
C2H5+C3H8=C2H6+NC3H7    1.0E11 0.0 1.04E4
    REV/3.63E10 0.0E0 9.934E3/
C3H8+C3H5-A=NC3H7+C3H6    7.94E11 0.0 2.05E4
    REV/5.372E16 -1.33E0 1.34E4/
C3H8+C3H5-A=IC3H7+C3H6    7.94E11 0.0 1.62E4
    REV/5.372E16 -1.33E0 9.095E3/
C3H8+CH3O=NC3H7+CH3OH    3.0E11 0.0 7.0E3
    REV/1.22E10 0.0E0 9.182E3/
C3H8+CH3O=IC3H7+CH3OH    3.0E11 0.0 7.0E3
    REV/1.22E10 0.0E0 9.182E3/
CH3O2+C3H8=CH3O2H+NC3H7    8.1E4 2.5 1.669E4
    REV/9.718E4 1.993E0 1.435E3/
CH3O2+C3H8=CH3O2H+IC3H7    5.88E4 2.5 1.486E4
    REV/1.113E4 2.307E0 2.147E3/
C2H5O2+C3H8=C2H5O2H+NC3H7    8.1E4 2.5 1.669E4
    REV/9.735E4 1.993E0 1.439E3/
C2H5O2+C3H8=C2H5O2H+IC3H7    5.88E4 2.5 1.486E4
    REV/1.115E4 2.307E0 2.151E3/
C3H8+CH3CO3=IC3H7+CH3CO3H    2.0E12 0.0 1.7E4
    REV/3.104E10 3.05E-1 8.65E3/
C3H8+CH3CO3=NC3H7+CH3CO3H    1.7E13 0.0 2.046E4
    REV/1.673E12 -9.0E-3 9.57E3/
C3H8+O2CHO=NC3H7+HO2CHO    5.52E4 2.55 1.648E4
    REV/1.187E-8 5.54E0 -1.92E3/
C3H8+O2CHO=IC3H7+HO2CHO    1.475E4 2.6 1.391E4
    REV/7.838E-6 4.65E0 -3.0E1/
IC3H7=H+C3H6    6.919E13 -0.025 3.769E4
    REV/2.64E13 0.0E0 2.16E3/
IC3H7+H=C2H5+CH3    2.0E13 0.0 0.0E0
    REV/4.344E7 1.176E0 8.62E3/
IC3H7+O2=C3H6+HO2    4.5E-19 0.0 5.02E3
    REV/2.0E-19 0.0E0 1.75E4/
IC3H7+OH=C3H6+H2O    2.41E13 0.0 0.0E0
    REV/2.985E12 5.7E-1 8.382E4/
IC3H7+O=CH3CHO+CH3    4.818E13 0.0 0.0E0
    REV/1.279E11 8.0E-1 8.648E4/
!NC3H7(=)CH3+C2H4 9.970E+40 -8.600 4.143E+04
!REV/ 1.898E+34 -6.990 1.710E+04 /
!NC3H7(=)H+C3H6 8.780E+39 -8.100 4.658E+04
!REV/ 2.070E+37 -7.390 1.202E+04 /
!
! CHECKED ON NIST 2006CUR250-275
!
NC3H7=CH3+C2H4    9.24E10 0.87 3.05E4
NC3H7=H+C3H6    4.14E12 0.17 3.56E4
!
NC3H7+O2=C3H6+HO2    3.0E-19 0.0 3.0E3
    REV/2.0E-19 0.0E0 1.75E4/
C2H5CHO+NC3H7=C2H5CO+C3H8    1.7E12 0.0 8.44E3
    REV/1.9E14 0.0E0 1.879E4/
C2H5CHO+IC3H7=C2H5CO+C3H8    1.7E12 0.0 8.44E3
    REV/1.9E14 0.0E0 1.879E4/
C2H5CHO+C3H5-A=C2H5CO+C3H6    1.7E12 0.0 8.44E3
    REV/1.0E13 0.0E0 2.8E4/
C3H6=C2H3+CH3    2.73E62 -13.28 1.232E5
    REV/6.822E53 -1.1779E1 2.055E4/
C3H6=C3H5-A+H    2.01E61 -13.26 1.185E5
    REV/2.041E61 -1.352E1 3.061E4/
C3H6=C3H5-S+H    7.71E69 -16.09 1.4E5
    REV/2.551E67 -1.5867E1 2.869E4/
C3H6=C3H5-T+H    5.62E71 -16.58 1.393E5
    REV/4.26E68 -1.6164E1 3.008E4/
C3H6+O=C2H5+HCO    1.58E7 1.76 -1.216E3
    REV/9.188E1 2.725E0 2.311E4/
C3H6+O=>CH2CO+CH3+H    2.5E7 1.76 7.6E1
! WJP: KR FROM THERMO ABOVE COLLISIONAL FOR THIS GLOBAL RXN
C3H6+O=>CH3CHCO+2H    2.5E7 1.76 7.6E1
!C3H6+O(=)CH3CHCO+H+H 2.500E+07 1.760 7.600E+01
!REV/ 0.000E+00 0.000 0.000E+00 /
C3H6+O=C3H5-A+OH    5.24E11 0.7 5.884E3
    REV/1.104E11 6.97E-1 2.015E4/
C3H6+O=C3H5-S+OH    1.2E11 0.7 8.959E3
    REV/8.239E7 1.18E0 -2.07E2/
C3H6+O=C3H5-T+OH    6.03E10 0.7 7.632E3
    REV/9.483E6 1.373E0 5.76E2/
C3H6+OH=C3H5-A+H2O    3.12E6 2.0 -2.98E2
    REV/1.343E7 1.909E0 3.027E4/
C3H6+OH=C3H5-S+H2O    2.11E6 2.0 2.778E3
    REV/2.959E4 2.393E0 9.916E3/
C3H6+OH=C3H5-T+H2O    1.11E6 2.0 1.451E3
    REV/3.565E3 2.586E0 1.07E4/
C3H6+HO2=C3H5-A+H2O2    2.7E4 2.5 1.234E4
    REV/6.341E6 1.82E0 1.201E4/
C3H6+HO2=C3H5-S+H2O2    1.8E4 2.5 2.762E4
    REV/1.377E4 2.304E0 3.864E3/
C3H6+HO2=C3H5-T+H2O2    9.0E3 2.5 2.359E4
    REV/1.577E3 2.497E0 1.941E3/
C3H6+H=C3H5-A+H2    1.73E5 2.5 2.492E3
    REV/7.023E4 2.515E0 1.817E4/
C3H6+H=C3H5-S+H2    8.04E5 2.5 1.228E4
    REV/1.063E3 2.999E0 4.526E3/
C3H6+H=C3H5-T+H2    4.05E5 2.5 9.794E3
    REV/1.227E2 3.192E0 4.15E3/
C3H6+H=C2H4+CH3    2.3E13 0.0 2.547E3
    REV/7.272E7 1.271E0 1.12E4/
C3H6+O2=C3H5-A+HO2    4.0E12 0.0 3.99E4
    REV/8.514E12 -3.33E-1 8.87E2/
C3H6+O2=C3H5-S+HO2    2.0E12 0.0 6.29E4
    REV/1.387E10 1.51E-1 4.59E2/
C3H6+O2=C3H5-T+HO2    1.4E12 0.0 6.07E4
    REV/2.224E9 3.44E-1 3.69E2/
C3H6+CH3=C3H5-A+CH4    2.21E0 3.5 5.675E3
    REV/8.184E2 3.07E0 2.289E4/
C3H6+CH3=C3H5-S+CH4    1.348E0 3.5 1.285E4
    REV/1.626E0 3.553E0 6.635E3/
C3H6+CH3=C3H5-T+CH4    8.4E-1 3.5 1.166E4
    REV/2.322E-1 3.746E0 7.552E3/
C3H6+C2H5=C3H5-A+C2H6    1.0E11 0.0 9.8E3
    REV/5.369E5 1.33E0 1.644E4/
C3H6+CH3CO3=C3H5-A+CH3CO3H    3.24E11 0.0 1.49E4
    REV/2.0E10 0.0E0 1.5E4/
C3H6+CH3O2=C3H5-A+CH3O2H    3.24E11 0.0 1.49E4
    REV/2.0E10 0.0E0 1.5E4/
C3H6+C2H5O2=C3H5-A+C2H5O2H    3.24E11 0.0 1.49E4
    REV/2.0E10 0.0E0 1.5E4/
C3H5-A=C2H2+CH3    2.397E48 -9.9 8.208E4
    REV/2.61E46 -9.82E0 3.695E4/
C3H5-A=C3H4-A+H    4.194E13 0.216 6.193E4
    REV/2.4E11 6.9E-1 3.007E3/
C3H5-A+HO2=C3H5O+OH    7.0E12 0.0 -1.0E3
    REV/1.605E12 6.0E-2 1.166E4/
C3H5-A+CH3O2=C3H5O+CH3O    7.0E12 0.0 -1.0E3
    REV/1.99E15 -7.4E-1 1.702E4/
C3H5-A+H=C3H4-A+H2    1.232E3 3.035 2.582E3
    REV/2.818E0 3.784E0 4.722E4/
C3H5-A+CH3=C3H4-A+CH4    1.0E11 0.0 0.0E0
    REV/4.921E12 5.0E-2 4.778E4/
C3H5-A+C2H5=C2H6+C3H4-A    4.0E11 0.0 0.0E0
    REV/1.802E12 5.0E-2 4.033E4/
C3H5-A+C2H5=C2H4+C3H6    4.0E11 0.0 0.0E0
    REV/6.937E16 -1.33E0 5.28E4/
C3H5-A+C2H3=C2H4+C3H4-A    1.0E12 0.0 0.0E0
    REV/1.624E13 5.0E-2 4.819E4/
C3H4-A+C3H6=2C3H5-A    4.749E8 0.734 2.87E4
    REV/8.43E10 0.0E0 -2.62E2/
C3H5-A+O2=C3H4-A+HO2    2.18E21 -2.85 3.076E4
    REV/2.614E19 -2.449E0 2.071E4/
C3H5-A+O2=CH2CHO+CH2O    7.14E15 -1.21 2.105E4
    REV/4.944E16 -1.4E0 8.862E4/
C3H5-A+O2=C2H3CHO+OH    2.47E13 -0.44 2.302E4
    REV/1.989E13 -6.09E-1 7.514E4/
C3H5-A+O2=>C2H2+CH2O+OH    9.72E29 -5.71 2.145E4
C3H5-S=C2H2+CH3    9.598E39 -8.17 4.203E4
    REV/1.61E40 -8.58E0 2.033E4/
C3H5-S=C3H4-P+H    4.187E15 -0.79 3.748E4
    REV/5.8E12 0.0E0 3.1E3/
C3H5-S+O2=CH3CHO+HCO    4.335E12 0.0 0.0E0
    REV/1.611E17 -1.27E0 9.653E4/
C3H5-S+H=C3H4-A+H2    3.333E12 0.0 0.0E0
    REV/7.977E12 1.1E-1 6.886E4/
C3H5-S+CH3=C3H4-A+CH4    1.0E11 0.0 0.0E0
    REV/6.253E12 1.1E-1 6.934E4/
C3H5-T=C2H2+CH3    2.163E40 -8.31 4.511E4
    REV/1.61E40 -8.58E0 2.033E4/
C3H5-T=C3H4-A+H    3.508E14 -0.44 4.089E4
    REV/8.5E12 0.0E0 2.0E3/
C3H5-T=C3H4-P+H    1.075E15 -0.6 3.849E4
    REV/6.5E12 0.0E0 2.0E3/
C3H5-T+O2=C3H4-A+HO2    1.89E30 -5.59 1.554E4
    REV/3.037E31 -5.865E0 2.681E4/
C3H5-T+O2=CH3COCH2+O    3.81E17 -1.36 5.58E3
    REV/2.0E11 0.0E0 1.75E4/
C3H5-T+O2=CH2O+CH3CO    3.71E25 -3.96 7.043E3
    REV/1.872E27 -4.43E0 1.012E5/
C3H5-T+H=C3H4-P+H2    3.333E12 0.0 0.0E0
    REV/2.138E16 -8.8E-1 7.105E4/
C3H5-T+CH3=C3H4-P+CH4    1.0E11 0.0 0.0E0
    REV/1.676E16 -8.8E-1 7.153E4/
!WJP: EST. KR FROM THERMO ABOVE COLLISONAL.
C3H4-A+M=C3H3+H+M    1.143E17 0.0 7.0E4
    REV/2.0E17 0.0E0 -1.0E3/
C3H4-A=C3H4-P    1.202E15 0.0 9.24E4
    REV/3.222E18 -9.9E-1 9.659E4/
C3H4-A+O2=C3H3+HO2    4.0E13 0.0 3.916E4
    REV/3.17E11 -8.6E-2 3.11E2/
C3H4-A+HO2=CH2CO+CH2+OH    4.0E12 0.0 1.9E4
    REV/1.0E0 0.0E0 0.0E0/
C3H4-A+OH=CH2CO+CH3    3.12E12 0.0 -3.97E2
    REV/1.806E17 -1.38E0 3.607E4/
C3H4-A+OH=C3H3+H2O    1.0E7 2.0 1.0E3
    REV/1.602E5 2.157E0 3.173E4/
C3H4-A+O=C2H4+CO    7.8E12 0.0 1.6E3
    REV/3.269E8 1.252E0 1.219E5/
C3H4-A+O=C2H2+CH2O    3.0E-3 4.61 -4.243E3
    REV/2.32E2 3.23E0 8.119E4/
C3H4-A+H=C3H3+H2    2.0E7 2.0 5.0E3
    REV/3.022E4 2.262E0 2.084E4/
C3H4-A+CH3=C3H3+CH4    3.67E-2 4.01 6.83E3
    REV/5.06E-2 3.826E0 2.421E4/
C3H4-A+C3H5-A=C3H3+C3H6    2.0E11 0.0 7.7E3
    REV/2.644E19 -2.71E0 4.214E4/
C3H4-A+C2H=C3H3+C2H2    1.0E13 0.0 0.0E0
    REV/1.42E16 -1.38E0 5.382E4/
!WJP: EST. KR FROM THERMO ABOVE COLLISONAL.
C3H4-P+M=C3H3+H+M    1.143E17 0.0 7.0E4
    REV/2.0E17 0.0E0 -1.0E3/
C3H4-P=C2H+CH3    4.2E16 0.0 1.0E5
    REV/1.018E12 6.1E-1 -1.6E3/
C3H4-P+O2=HCCO+OH+CH2    1.0E7 1.5 3.01E4
    REV/1.0E0 0.0E0 0.0E0/
C3H4-P+O2=C3H3+HO2    2.0E13 0.0 4.16E4
    REV/6.371E11 -2.08E-1 1.021E3/
C3H4-P+HO2=C2H4+CO+OH    3.0E12 0.0 1.9E4
    REV/1.0E0 0.0E0 0.0E0/
C3H4-P+OH=C3H3+H2O    1.0E7 2.0 1.0E3
    REV/6.441E5 2.034E0 3.0E4/
C3H4-P+OH=CH2CO+CH3    5.0E-4 4.5 -1.0E3
    REV/1.079E-2 4.11E0 3.128E4/
C3H4-P+O=C2H3+HCO    3.2E12 0.0 2.01E3
    REV/2.548E12 -3.9E-1 3.235E4/
C3H4-P+O=HCCO+CH3    9.6E8 1.0 0.0E0
    REV/1.43E4 1.793E0 2.699E4/
!REVERSE FROM THERMO IS SEVERELY ABOVE COLLISIONAL
C3H4-P+O=>HCCO+CH2+H    3.2E-19 0.0 2.01E3
!REV/ 1.000E-30 0.000 0.000E+00 /
C3H4-P+O=C3H3+OH    7.65E8 1.5 8.6E3
    REV/2.177E8 1.31E0 2.247E4/
C3H4-P+H=C3H3+H2    2.0E7 2.0 5.0E3
    REV/1.215E5 2.14E0 1.911E4/
C3H4-P+CH3=C3H3+CH4    1.5E0 3.5 5.6E3
    REV/8.313E0 3.195E0 2.125E4/
C3H4-P+C2H=C3H3+C2H2    1.0E12 0.0 0.0E0
    REV/5.297E11 -3.9E-1 4.963E4/
C3H4-P+C2H3=C3H3+C2H4    1.0E12 0.0 7.7E3
    REV/9.541E11 -3.9E-1 5.245E4/
C3H4-P+C3H5-A=C3H3+C3H6    1.0E12 0.0 7.7E3
    REV/4.931E16 -1.73E0 3.795E4/
C3H3+O=CH2O+C2H    1.0E13 0.0 0.0E0
    REV/5.446E14 0.0E0 3.161E4/
C3H3+OH=C3H2+H2O    1.0E13 0.0 0.0E0
    REV/1.343E15 0.0E0 1.568E4/
C3H3+O2=CH2CO+HCO    3.01E10 0.0 2.87E3
    REV/4.881E11 0.0E0 5.947E4/
C3H3+CH3=C2H5+C2H    4.299E15 -0.79 4.563E4
    REV/1.81E13 0.0E0 0.0E0/
C3H2+O2=HCO+HCCO    5.0E13 0.0 0.0E0
    REV/2.326E14 -2.14E-1 7.719E4/
C3H4-A+HO2=C2H4+CO+OH    1.0E12 0.0 1.4E4
    REV/1.0E0 0.0E0 0.0E0/
C3H4-A+HO2=C3H3+H2O2    3.0E13 0.0 1.4E4
    REV/1.551E16 -1.38E0 4.4E4/
C2H2+CH3=C3H4-P+H    4.229E8 1.143 1.209E4
    REV/1.0E14 0.0E0 4.0E3/
C2H2+CH3=C3H4-A+H    6.74E19 -2.08 3.159E4
    REV/6.407E25 -3.345E0 2.177E4/
C3H3+H=C3H2+H2    5.0E13 0.0 0.0E0
    REV/5.999E7 1.365E0 4.11E3/
C3H2+OH=C2H2+HCO    5.0E13 0.0 0.0E0
    REV/2.282E16 -2.54E-1 7.502E4/
C3H2+O2=>HCCO+CO+H    5.0E13 0.0 0.0E0
CH3CHCO+OH=>C2H5+CO2    1.73E12 0.0 -1.01E3
CH3CHCO+OH=>SC2H4OH+CO    2.0E12 0.0 -1.01E3
CH3CHCO+H=>C2H5+CO    4.4E12 0.0 1.459E3
CH3CHCO+O=>CH3CHO+CO    3.2E12 0.0 -4.37E2
NC3H7+HO2=NC3H7O+OH    7.0E12 0.0 -1.0E3
    REV/6.22E15 -6.92E-1 2.531E4/
CH3O2+NC3H7=CH3O+NC3H7O    7.0E12 0.0 -1.0E3
    REV/3.89E14 -3.94E-1 2.955E4/
NC3H7O2=NC3H7+O2    2.4E20 -1.616 3.596E4
    REV/4.52E12 0.0E0 0.0E0/
NC3H7O2+CH3O2=>NC3H7O+CH3O+O2    1.4E16 -1.61 1.86E3
NC3H7O2+CH3CO3=>NC3H7O+CH3CO2+O2    1.4E16 -1.61 1.86E3
NC3H7O2+C2H5O2=>NC3H7O+C2H5O+O2    1.4E16 -1.61 1.86E3
2NC3H7O2=>O2+2NC3H7O    1.4E16 -1.61 1.86E3
NC3H7O2+CH3=NC3H7O+CH3O    7.0E12 0.0 -1.0E3
    REV/5.303E12 9.0E-3 2.692E4/
NC3H7O2+C2H5=NC3H7O+C2H5O    7.0E12 0.0 -1.0E3
    REV/7.54E14 -5.92E-1 2.933E4/
NC3H7O2+NC3H7=2NC3H7O    7.0E12 0.0 -1.0E3
    REV/7.612E14 -5.61E-1 2.8E4/
NC3H7O2+C3H5-A=NC3H7O+C3H5O    7.0E12 0.0 -1.0E3
    REV/1.964E11 1.91E-1 1.434E4/
NC3H7O=C2H5+CH2O    2.716E21 -2.449 1.57E4
    REV/1.0E11 0.0E0 3.496E3/
NC3H7O=C2H5CHO+H    8.899E10 0.746 1.98E4
    REV/4.0E12 0.0E0 6.26E3/
NC3H7O2=C3H6OOH1-2    6.0E11 0.0 2.685E4
    REV/1.117E8 5.83E-1 1.172E4/
NC3H7O2=C3H6OOH1-3    1.125E11 0.0 2.4E4
    REV/2.716E11 -5.07E-1 8.936E3/
C3H6OOH1-3=C3H6O1-3+OH    7.5E10 0.0 1.525E4
    REV/1.186E6 1.765E0 2.871E4/
C3H6OOH1-2=C3H6+HO2    7.834E15 -1.3 1.595E4
    REV/1.0E11 0.0E0 1.1E4/
C3H6OOH1-3=>OH+CH2O+C2H4    3.035E15 -0.79 2.74E4
C3H6OOH1-2=>C2H4+CH2O+OH    1.31E33 -7.01 4.812E4
C3H6OOH1-2O2=C3H6OOH1-2+O2    2.391E25 -2.945 4.01E4
    REV/5.0E12 0.0E0 0.0E0/
C3H6OOH1-3O2=C3H6OOH1-3+O2    2.853E20 -1.626 3.569E4
    REV/4.52E12 0.0E0 0.0E0/
C3H6OOH1-2O2=C3KET12+OH    6.0E11 0.0 2.6E4
    REV/9.249E4 1.329E0 4.892E4/
C3H6OOH1-3O2=C3KET13+OH    7.5E10 0.0 2.1E4
    REV/4.101E3 1.496E0 4.474E4/
C3KET12=>CH3CHO+HCO+OH    9.45E15 0.0 4.3E4
C3KET13=>CH2O+CH2CHO+OH    1.0E16 0.0 4.3E4
C3H5O=C2H3CHO+H    1.0E14 0.0 2.91E4
    REV/1.676E14 -1.56E-1 1.969E4/
C3H5O=C2H3+CH2O    1.464E20 -1.968 3.509E4
    REV/1.5E11 0.0E0 1.06E4/
C3H5O+O2=C2H3CHO+HO2    1.0E12 0.0 6.0E3
    REV/1.288E11 0.0E0 3.2E4/
C3H6O1-3=C2H4+CH2O    6.0E14 0.0 6.0E4
    REV/2.97E11 0.0E0 3.108E4/
C3H6O1-3+OH=>CH2O+C2H3+H2O    5.0E12 0.0 0.0E0
C3H6O1-3+O=>CH2O+C2H3+OH    8.43E13 0.0 5.2E3
C3H6O1-3+H=>CH2O+C2H3+H2    2.63E7 2.0 5.0E3
C3H6O1-3+CH3O2=>CH2O+C2H3+CH3O2H    1.0E13 0.0 1.9E4
C3H6O1-3+HO2=>CH2O+C2H3+H2O2    1.0E13 0.0 1.5E4
C3H6O1-3+CH3=>CH2O+C2H3+CH4    2.0E11 0.0 1.0E4
NC3H7O2=C3H6+HO2    5.044E38 -8.112 4.049E4
    REV/1.198E30 -6.229E0 2.042E4/
PC4H9=C2H5+C2H4    3.504E12 0.463 2.947E4
    REV/1.32E4 2.48E0 6.13E3/
PC4H9=C4H8-1+H    2.622E12 0.253 3.57E4
    REV/2.5E11 5.1E-1 2.62E3/
PC4H9+O2=C4H8-1+HO2    2.0E-18 0.0 5.0E3
    REV/2.0E-19 0.0E0 1.75E4/
C4H8-1=C3H5-A+CH3    5.081E19 -1.256 7.651E4
    REV/1.35E13 0.0E0 0.0E0/
C4H8-1=C2H3+C2H5    2.882E23 -1.99 1.016E5
    REV/9.0E12 0.0E0 0.0E0/
C4H8-1=H+C4H71-3    3.724E14 -0.111 8.52E4
    REV/5.0E13 0.0E0 0.0E0/
C4H8-1+O2=C4H71-3+HO2    2.0E13 0.0 3.719E4
    REV/4.653E12 7.0E-2 -1.68E2/
C4H8-1+H=C4H71-1+H2    7.81E5 2.5 1.229E4
    REV/2.213E5 2.36E0 6.469E3/
C4H8-1+H=C4H71-3+H2    3.376E5 2.36 2.07E2
    REV/4.323E6 2.1E0 2.033E4/
C4H8-1+H=C4H71-4+H2    6.651E5 2.54 6.756E3
    REV/3.045E4 2.54E0 1.103E4/
C4H8-1+OH=C4H71-1+H2O    2.14E6 2.0 2.778E3
    REV/2.625E6 1.86E0 1.212E4/
C4H8-1+OH=C4H71-3+H2O    2.764E4 2.64 -1.919E3
    REV/1.532E6 2.38E0 3.336E4/
C4H8-1+OH=C4H71-4+H2O    5.27E9 0.97 1.586E3
    REV/1.044E9 9.7E-1 2.101E4/
C4H8-1+CH3=C4H71-3+CH4    3.69E0 3.31 4.002E3
    REV/1.234E3 3.05E0 2.461E4/
C4H8-1+CH3=C4H71-4+CH4    4.52E-1 3.65 7.154E3
    REV/5.405E-1 3.65E0 1.191E4/
C4H8-1+HO2=C4H71-3+H2O2    4.82E3 2.55 1.053E4
    REV/1.586E6 1.96E0 1.435E4/
C4H8-1+HO2=C4H71-4+H2O2    2.38E3 2.55 1.649E4
    REV/2.8E3 2.22E0 4.46E3/
C4H8-1+CH3O2=C4H71-3+CH3O2H    4.82E3 2.55 1.053E4
    REV/3.303E6 1.79E0 1.133E4/
C4H8-1+CH3O2=C4H71-4+CH3O2H    2.38E3 2.55 1.649E4
    REV/5.831E3 2.04E0 1.44E3/
C4H8-1+CH3O=C4H71-3+CH3OH    4.0E1 2.9 8.609E3
    REV/2.47E2 2.67E0 2.7E4/
C4H8-1+CH3O=C4H71-4+CH3OH    2.17E11 0.0 6.458E3
    REV/4.789E9 2.0E-2 9.002E3/
C4H8-1+CH3CO3=C4H71-3+CH3CO3H    1.0E11 0.0 8.0E3
    REV/2.0E10 0.0E0 1.0E4/
C4H8-1+C3H5-A=C4H71-3+C3H6    7.9E10 0.0 1.24E4
    REV/1.0E11 0.0E0 1.75E4/
C4H8-1+C4H6=2C4H71-3    2.35E12 0.0 4.672E4
    REV/1.6E12 0.0E0 0.0E0/
C4H8-1+C2H5O2=C4H71-3+C2H5O2H    1.4E12 0.0 1.49E4
    REV/3.16E11 0.0E0 1.3E4/
C4H8-1+CH3O2=>C4H8O1-2+CH3O    1.0E12 0.0 1.434E4
C4H8-2=H+C4H71-3    2.337E14 0.143 8.789E4
    REV/5.0E13 0.0E0 0.0E0/
C4H8-2+O2=C4H71-3+HO2    4.0E13 0.0 3.939E4
    REV/1.35E13 -1.8E-1 -9.24E2/
C4H8-2+H=C4H71-3+H2    3.46E5 2.5 2.492E3
    REV/6.428E6 1.99E0 1.966E4/
C4H8-2+OH=C4H71-3+H2O    6.24E6 2.0 -2.98E2
    REV/5.019E8 1.49E0 3.202E4/
C4H8-2+CH3=C4H71-3+CH4    4.42E0 3.5 5.675E3
    REV/2.145E3 2.99E0 2.332E4/
C4H8-2+HO2=C4H71-3+H2O2    1.928E4 2.6 1.391E4
    REV/9.205E6 1.77E0 1.477E4/
C4H8-2+CH3O2=C4H71-3+CH3O2H    1.928E4 2.6 1.391E4
    REV/1.917E7 1.59E0 1.175E4/
C4H8-2+CH3O=C4H71-3+CH3OH    1.8E1 2.95 1.199E4
    REV/1.612E2 2.47E0 2.742E4/
C4H8-2+C2H5O2=C4H71-3+C2H5O2H    3.2E12 0.0 1.49E4
    REV/1.585E11 0.0E0 1.47E4/
C4H8-1+HO2=>C4H8O1-2+OH    1.0E12 0.0 1.434E4
C4H71-1=C2H2+C2H5    1.066E15 -0.56 3.032E4
    REV/2.0E11 0.0E0 7.8E3/
C4H71-4=C2H4+C2H3    8.766E12 -0.22 3.629E4
    REV/2.0E11 0.0E0 7.8E3/
!
!
!!!ADDED 1984WEI/BEN307-333
C4H71-4=C4H6+H    3.0E13 0.0 3.5E4
!
!
C4H72-2=C3H4-P+CH3    6.326E10 0.52 3.002E4
    REV/1.0E11 0.0E0 7.8E3/
C4H71-3=C4H6+H    1.2E14 0.0 4.93E4
    REV/4.0E13 0.0E0 1.3E3/
C4H71-3+C2H5=C4H8-1+C2H4    2.59E12 0.0 -1.31E2
    REV/1.149E13 6.0E-2 4.944E4/
C4H71-3+CH3O=C4H8-1+CH2O    2.41E13 0.0 0.0E0
    REV/2.482E12 2.8E-1 6.633E4/
C4H71-3+O=C2H3CHO+CH3    6.03E13 0.0 0.0E0
    REV/3.385E15 -7.8E-1 8.163E4/
C4H71-3+HO2=C4H7O+OH    9.64E12 0.0 0.0E0
    REV/7.29E15 -1.09E0 1.553E4/
C4H71-3+CH3O2=C4H7O+CH3O    9.64E12 0.0 0.0E0
    REV/7.12E17 -1.67E0 2.029E4/
C3H5-A+C4H71-3=C3H6+C4H6    6.31E12 0.0 0.0E0
    REV/1.0E10 0.0E0 5.0E4/
C4H71-3+O2=C4H6+HO2    1.0E9 0.0 0.0E0
    REV/1.0E11 0.0E0 1.7E4/
H+C4H71-3=C4H6+H2    3.16E13 0.0 0.0E0
    REV/1.066E13 0.0E0 5.681E4/
C2H5+C4H71-3=C4H6+C2H6    3.98E12 0.0 0.0E0
    REV/3.211E12 0.0E0 4.984E4/
C2H3+C4H71-3=C2H4+C4H6    3.98E12 0.0 0.0E0
    REV/1.157E13 0.0E0 5.771E4/
C4H71-3+C2H5O2=C4H7O+C2H5O    3.8E12 0.0 -1.2E3
    REV/2.0E10 0.0E0 0.0E0/
NC3H7O2+C4H71-3=NC3H7O+C4H7O    3.8E12 0.0 -1.2E3
    REV/2.0E10 0.0E0 0.0E0/
C4H7O=CH3CHO+C2H3    7.94E14 0.0 1.9E4
    REV/1.0E10 0.0E0 2.0E4/
C4H7O=C2H3CHO+CH3    7.94E14 0.0 1.9E4
    REV/1.0E10 0.0E0 2.0E4/
C4H6=2C2H3    4.027E19 -1.0 9.815E4
    REV/1.26E13 0.0E0 0.0E0/
C4H6+OH=C2H5+CH2CO    1.0E12 0.0 0.0E0
    REV/3.73E12 0.0E0 3.002E4/
C4H6+OH=CH2O+C3H5-A    1.0E12 0.0 0.0E0
    REV/3.501E6 0.0E0 7.106E4/
C4H6+OH=C2H3+CH3CHO    1.0E12 0.0 0.0E0
    REV/5.437E11 0.0E0 1.855E4/
C4H6+O=C2H4+CH2CO    1.0E12 0.0 0.0E0
    REV/6.377E11 0.0E0 9.434E4/
C4H6+O=CH2O+C3H4-A    1.0E12 0.0 0.0E0
    REV/1.075E12 0.0E0 7.905E4/
C2H3+C2H4=C4H6+H    5.0E11 0.0 7.3E3
    REV/1.0E13 0.0E0 4.7E3/
C4H8O1-2+OH=>CH2O+C3H5-A+H2O    5.0E12 0.0 0.0E0
C4H8O1-2+H=>CH2O+C3H5-A+H2    5.0E12 0.0 0.0E0
C4H8O1-2+O=>CH2O+C3H5-A+OH    5.0E12 0.0 0.0E0
C4H8O1-2+HO2=>CH2O+C3H5-A+H2O2    1.0E13 0.0 1.5E4
C4H8O1-2+CH3O2=>CH2O+C3H5-A+CH3O2H    1.0E13 0.0 1.9E4
C4H8O1-2+CH3=>CH2O+C3H5-A+CH4    2.0E11 0.0 1.0E4
C4H8O1-3+OH=>CH2O+C3H5-A+H2O    5.0E12 0.0 0.0E0
C4H8O1-3+H=>CH2O+C3H5-A+H2    5.0E12 0.0 0.0E0
C4H8O1-3+O=>CH2O+C3H5-A+OH    5.0E12 0.0 0.0E0
C4H8O1-3+HO2=>CH2O+C3H5-A+H2O2    1.0E13 0.0 1.5E4
C4H8O1-3+CH3O2=>CH2O+C3H5-A+CH3O2H    1.0E13 0.0 1.9E4
C4H8O1-3+CH3=>CH2O+C3H5-A+CH4    2.0E11 0.0 1.0E4
PC4H9O2=PC4H9+O2    2.849E20 -1.642 3.593E4
    REV/4.52E12 0.0E0 0.0E0/
NC3H7O2+PC4H9=NC3H7O+PC4H9O    7.0E12 0.0 -1.0E3
    REV/1.056E15 -6.11E-1 2.768E4/
PC4H9O2+HO2=>PC4H9O+OH+O2    1.4E-14 -1.61 1.86E3
C4H71-3+PC4H9O2=C4H7O+PC4H9O    7.0E12 0.0 -1.0E3
    REV/1.186E14 -7.63E-1 1.61E4/
2PC4H9O2=>O2+2PC4H9O    1.4E16 -1.61 1.86E3
PC4H9O2+NC3H7O2=>PC4H9O+NC3H7O+O2    1.4E16 -1.61 1.86E3
PC4H9O2+C2H5O2=>PC4H9O+C2H5O+O2    1.4E16 -1.61 1.86E3
PC4H9O2+CH3O2=>PC4H9O+CH3O+O2    1.4E16 -1.61 1.86E3
PC4H9O2+CH3CO3=>PC4H9O+CH3CO2+O2    1.4E16 -1.61 1.86E3
PC4H9O2+CH3=PC4H9O+CH3O    7.0E12 0.0 -1.0E3
    REV/6.199E12 -1.5E-2 2.663E4/
PC4H9O2+C2H5=PC4H9O+C2H5O    7.0E12 0.0 -1.0E3
    REV/8.813E14 -6.17E-1 2.904E4/
PC4H9O2+NC3H7=PC4H9O+NC3H7O    7.0E12 0.0 -1.0E3
    REV/8.898E14 -5.86E-1 2.771E4/
PC4H9O2+PC4H9=2PC4H9O    7.0E12 0.0 -1.0E3
    REV/1.235E15 -6.36E-1 2.739E4/
PC4H9O2+C3H5-A=PC4H9O+C3H5O    7.0E12 0.0 -1.0E3
    REV/2.296E11 1.67E-1 1.405E4/
PC4H9+HO2=PC4H9O+OH    7.0E12 0.0 -1.0E3
    REV/8.63E15 -7.43E-1 2.5E4/
CH3O2+PC4H9=CH3O+PC4H9O    7.0E12 0.0 -1.0E3
    REV/5.398E14 -4.44E-1 2.924E4/
PC4H9O=NC3H7+CH2O    1.558E21 -2.444 1.523E4
    REV/5.0E10 0.0E0 3.457E3/
PC4H9O2=C4H8OOH1-3    2.5E10 0.0 2.085E4
    REV/3.231E9 -1.36E-1 7.871E3/
PC4H9O2=C4H8-1+HO2    5.044E38 -8.11 4.049E4
    REV/1.599E30 -6.283E0 2.035E4/
C4H8OOH1-3=>C4H8O1-3+OH    7.5E10 0.0 1.525E4
C4H8OOH1-3=>OH+CH2O+C3H6    6.635E13 -0.16 2.99E4
C4H8OOH1-3O2=C4H8OOH1-3+O2    5.601E22 -2.234 3.796E4
    REV/7.54E12 0.0E0 0.0E0/
C4H8OOH1-3O2=NC4KET13+OH    2.5E10 0.0 2.1E4
    REV/1.435E3 1.486E0 4.474E4/
NC4KET13=>CH3CHO+CH2CHO+OH    1.05E16 0.0 4.16E4
C2H5COCH3+OH=CH2CH2COCH3+H2O    7.55E9 0.97 1.586E3
    REV/1.527E9 9.6E-1 2.102E4/
C2H5COCH3+OH=CH3CHCOCH3+H2O    8.45E11 0.0 -2.28E2
    REV/1.586E13 -2.3E-1 2.862E4/
C2H5COCH3+OH=C2H5COCH2+H2O    5.1E11 0.0 1.192E3
    REV/6.628E13 -7.0E-1 2.767E4/
C2H5COCH3+HO2=CH2CH2COCH3+H2O2    2.38E4 2.55 1.649E4
    REV/2.857E4 2.22E0 4.459E3/
C2H5COCH3+HO2=CH3CHCOCH3+H2O2    2.0E11 0.0 8.698E3
    REV/2.229E13 -5.5E-1 6.08E3/
C2H5COCH3+HO2=C2H5COCH2+H2O2    2.38E4 2.55 1.469E4
    REV/1.836E7 1.52E0 9.702E3/
C2H5COCH3+O=CH2CH2COCH3+OH    2.25E13 0.0 7.7E3
    REV/4.616E11 -1.0E-2 9.882E3/
C2H5COCH3+O=CH3CHCOCH3+OH    3.07E13 0.0 3.4E3
    REV/5.847E13 -2.3E-1 1.5E4/
C2H5COCH3+O=C2H5COCH2+OH    5.0E12 0.0 5.962E3
    REV/6.592E13 -7.0E-1 1.519E4/
C2H5COCH3+H=CH2CH2COCH3+H2    9.16E6 2.0 7.7E3
    REV/4.279E5 1.99E0 1.198E4/
C2H5COCH3+H=CH3CHCOCH3+H2    4.46E6 2.0 3.2E3
    REV/1.934E7 1.77E0 1.689E4/
C2H5COCH3+H=C2H5COCH2+H2    9.3E12 0.0 6.357E3
    REV/2.792E14 -7.0E-1 1.768E4/
C2H5COCH3+O2=CH2CH2COCH3+HO2    2.05E13 0.0 5.131E4
    REV/1.74E10 3.2E-1 -1.895E3/
C2H5COCH3+O2=CH3CHCOCH3+HO2    1.55E13 0.0 4.197E4
    REV/1.221E12 1.0E-1 -1.822E3/
C2H5COCH3+O2=C2H5COCH2+HO2    2.05E13 0.0 4.915E4
    REV/1.118E13 -3.7E-1 2.988E3/
C2H5COCH3+CH3=CH2CH2COCH3+CH4    3.19E1 3.17 7.172E3
    REV/3.893E1 3.16E0 1.193E4/
C2H5COCH3+CH3=CH3CHCOCH3+CH4    1.74E0 3.46 3.68E3
    REV/1.971E2 3.23E0 1.745E4/
C2H5COCH3+CH3=C2H5COCH2+CH4    1.62E11 0.0 9.63E3
    REV/1.27E14 -7.0E-1 2.143E4/
C2H5COCH3+CH3O=CH2CH2COCH3+CH3OH    2.17E11 0.0 6.46E3
    REV/4.887E9 2.0E-2 9.007E3/
C2H5COCH3+CH3O=CH3CHCOCH3+CH3OH    1.45E11 0.0 2.771E3
    REV/3.031E11 -2.0E-1 1.473E4/
C2H5COCH3+CH3O=C2H5COCH2+CH3OH    2.17E11 0.0 4.66E3
    REV/3.14E12 -6.8E-1 1.425E4/
C2H5COCH3+CH3O2=CH2CH2COCH3+CH3O2H    3.01E12 0.0 1.938E4
    REV/7.525E12 -5.1E-1 4.329E3/
C2H5COCH3+CH3O2=CH3CHCOCH3+CH3O2H    2.0E12 0.0 1.525E4
    REV/4.641E14 -7.3E-1 9.612E3/
C2H5COCH3+CH3O2=C2H5COCH2+CH3O2H    3.01E12 0.0 1.758E4
    REV/4.836E15 -1.2E0 9.572E3/
C2H5COCH3+C2H3=CH2CH2COCH3+C2H4    5.0E11 0.0 1.04E4
    REV/3.436E8 8.2E-1 1.403E4/
C2H5COCH3+C2H3=CH3CHCOCH3+C2H4    3.0E11 0.0 3.4E3
    REV/1.914E10 6.0E-1 1.644E4/
C2H5COCH3+C2H3=C2H5COCH2+C2H4    6.15E10 0.0 4.278E3
    REV/2.716E10 1.3E-1 1.495E4/
C2H5COCH3+C2H5=CH2CH2COCH3+C2H6    5.0E10 0.0 1.34E4
    REV/9.549E12 -5.7E-1 1.399E4/
C2H5COCH3+C2H5=CH3CHCOCH3+C2H6    3.0E10 0.0 8.6E3
    REV/5.319E14 -7.9E-1 1.86E4/
C2H5COCH3+C2H5=C2H5COCH2+C2H6    5.0E10 0.0 1.16E4
    REV/6.136E15 -1.26E0 1.923E4/
CH2CH2CHO=C2H4+HCO    3.127E13 -0.52 2.459E4
    REV/1.5E11 0.0E0 8.3E3/
CH2CH2COCH3=C2H4+CH3CO    1.0E14 0.0 1.8E4
    REV/1.0E11 0.0E0 0.0E0/
C2H5COCH2=CH2CO+C2H5    1.0E14 0.0 3.5E4
    REV/1.0E11 0.0E0 0.0E0/
CH3CHCOCH3=C2H3COCH3+H    3.417E16 -0.82 4.177E4
    REV/5.0E12 0.0E0 1.2E3/
CH3CHCOCH3=CH3CHCO+CH3    1.406E15 -0.44 3.834E4
    REV/1.23E11 0.0E0 7.8E3/
NC3H7CHO+O2=NC3H7CO+HO2    1.2E5 2.5 3.756E4
    REV/1.0E7 5.0E-1 4.0E3/
NC3H7CHO+OH=NC3H7CO+H2O    2.0E6 1.8 -1.3E3
    REV/1.553E4 2.32E0 2.805E4/
NC3H7CHO+H=NC3H7CO+H2    4.14E9 1.12 2.32E3
    REV/3.03E6 1.746E0 1.678E4/
NC3H7CHO+O=NC3H7CO+OH    5.94E12 0.0 1.868E3
    REV/2.258E9 6.07E-1 1.492E4/
NC3H7CHO+HO2=NC3H7CO+H2O2    4.09E4 2.5 1.02E4
    REV/1.733E4 2.431E0 8.662E3/
NC3H7CHO+CH3=NC3H7CO+CH4    2.89E-3 4.62 3.21E3
    REV/1.93E-3 4.8E0 1.921E4/
NC3H7CHO+CH3O=NC3H7CO+CH3OH    1.0E12 0.0 3.3E3
    REV/1.572E10 4.13E-1 1.799E4/
NC3H7CHO+CH3O2=NC3H7CO+CH3O2H    4.09E4 2.5 1.02E4
    REV/3.371E5 1.986E0 7.067E3/
NC3H7CHO+OH=C3H6CHO-2+H2O    4.68E7 1.61 -3.5E1
    REV/9.102E3 2.444E0 1.974E4/
NC3H7CHO+OH=C3H6CHO-3+H2O    5.52E2 3.12 -1.176E3
    REV/1.428E2 3.4E0 2.551E4/
NC3H7CHO+HO2=C3H6CHO-2+H2O2    9.64E3 2.6 1.391E4
    REV/1.023E2 2.845E0 2.791E3/
NC3H7CHO+HO2=C3H6CHO-3+H2O2    3.44E12 0.05 1.788E4
    REV/4.855E13 -2.59E-1 1.366E4/
NC3H7CHO+CH3O2=C3H6CHO-2+CH3O2H    9.64E3 2.6 1.391E4
    REV/1.99E3 2.4E0 1.196E3/
NC3H7CHO+CH3O2=C3H6CHO-3+CH3O2H    3.44E12 0.05 1.788E4
    REV/9.445E14 -7.04E-1 1.207E4/
NC3H7CO=NC3H7+CO    1.0E11 0.0 9.6E3
    REV/2.193E3 1.763E0 -1.1E3/
C3H6CHO-3=C2H5CHCO+H    8.431E15 -0.6 4.04E4
    REV/5.0E12 0.0E0 1.2E3/
C3H6CHO-3=C2H3CHO+CH3    3.174E14 -0.39 2.99E4
    REV/1.23E11 0.0E0 7.8E3/
C3H6CHO-2=SC3H5CHO+H    4.947E12 -0.15 3.13E4
    REV/5.0E12 0.0E0 2.9E3/
C3H6CHO-2=C3H6+HCO    8.249E12 -0.18 2.19E4
    REV/1.0E11 0.0E0 6.0E3/
C2H5CHCO+OH=>NC3H7+CO2    3.73E12 0.0 -1.01E3
C2H5CHCO+H=>NC3H7+CO    4.4E12 0.0 1.459E3
C2H5CHCO+O=>C3H6+CO2    3.2E12 0.0 -4.37E2
SC3H5CHO+OH=SC3H5CO+H2O    2.69E10 0.76 -3.4E2
    REV/4.831E10 7.7E-1 3.709E4/
SC3H5CO=C3H5-S+CO    8.6E15 0.0 2.3E4
    REV/1.0E11 0.0E0 6.0E3/
SC3H5CHO+HO2=SC3H5CO+H2O2    1.0E12 0.0 1.192E4
    REV/1.066E13 -3.2E-1 1.789E4/
SC3H5CHO+CH3=SC3H5CO+CH4    3.98E12 0.0 8.7E3
    REV/4.313E13 1.0E-2 3.146E4/
SC3H5CHO+O=SC3H5CO+OH    7.18E12 0.0 1.389E3
    REV/1.308E12 1.0E-2 2.157E4/
SC3H5CHO+O2=SC3H5CO+HO2    4.0E13 0.0 3.76E4
    REV/3.014E11 3.4E-1 2.394E3/
SC3H5CHO+H=SC3H5CO+H2    2.6E12 0.0 2.6E3
    REV/1.079E12 1.0E-2 2.488E4/
! WJP: 2 STEP RXN IN ONE STEP=) ZERO REVERSE RATE.
C2H3COCH3+OH=>CH3CHO+CH3CO    1.0E11 0.0 0.0E0
!REV/ 0.000E+00 0.000 0.000E+00 /
! WJP: 2 STEP RXN IN ONE STEP=) ZERO REVERSE RATE.
C2H3COCH3+OH=>CH2CO+C2H3+H2O    5.1E11 0.0 1.192E3
!REV/ 0.000E+00 0.000 0.000E+00 /
! WJP: 2 STEP RXN IN ONE STEP=) ZERO REVERSE RATE.
C2H3COCH3+HO2=>CH2CHO+CH3CO+OH    6.03E9 0.0 7.949E3
!REV/ 0.000E+00 0.000 0.000E+00 /
! WJP: 2 STEP RXN IN ONE STEP=) ZERO REVERSE RATE.
C2H3COCH3+HO2=>CH2CO+C2H3+H2O2    8.5E12 0.0 2.046E4
!REV/ 0.000E+00 0.000 0.000E+00 /
! WJP: 2 STEP RXN IN ONE STEP=) ZERO REVERSE RATE.
C2H3COCH3+CH3O2=>CH2CHO+CH3CO+CH3O    3.97E11 0.0 1.705E4
!REV/ 0.000E+00 0.000 0.000E+00 /
! WJP: 2 STEP RXN IN ONE STEP=) ZERO REVERSE RATE.
C2H3COCH3+CH3O2=>CH2CO+C2H3+CH3O2H    3.01E12 0.0 1.758E4
IC4H9=IC4H8+H    3.371E13 0.124 3.366E4
    REV/6.25E11 5.1E-1 2.62E3/
IC4H9=C3H6+CH3    9.504E11 0.773 3.07E4
    REV/1.89E3 2.67E0 6.85E3/
IC4H9+O2=IC4H8+HO2    1.07E0 3.71 9.322E3
    REV/4.158E-2 4.024E0 2.715E4/
IC4H8=C3H5-T+CH3    1.92E66 -14.22 1.281E5
    REV/1.561E56 -1.2293E1 2.61E4/
IC4H8=IC4H7+H    3.07E55 -11.49 1.143E5
    REV/1.428E55 -1.1738E1 2.6E4/
IC4H8+H=C3H6+CH3    5.68E33 -5.72 2.0E4
    REV/6.093E26 -4.209E0 2.72E4/
IC4H8+H=IC4H7+H2    3.4E5 2.5 2.492E3
    REV/6.32E4 2.528E0 1.816E4/
IC4H8+O=>CH2CO+2CH3    3.33E7 1.76 7.6E1
!REV/ 0.000E+00 0.000 0.000E+00 /
IC4H8+O=IC4H7+OH    1.206E11 0.7 7.633E3
    REV/1.164E10 7.09E-1 2.189E4/
IC4H8+CH3=IC4H7+CH4    4.42E0 3.5 5.675E3
    REV/7.495E2 3.082E0 2.289E4/
IC4H8+HO2=IC4H7+H2O2    1.928E4 2.6 1.391E4
    REV/2.073E6 1.933E0 1.358E4/
IC4H8+O2CHO=IC4H7+HO2CHO    1.928E4 2.6 1.391E4
    REV/6.514E-7 4.9E0 -3.468E3/
IC4H8+O2=IC4H7+HO2    6.0E12 0.0 3.99E4
    REV/5.848E12 -3.2E-1 8.83E2/
IC4H8+C3H5-A=IC4H7+C3H6    7.94E11 0.0 2.05E4
    REV/4.4E20 -1.33E0 6.061E4/
IC4H8+C3H5-S=IC4H7+C3H6    7.94E11 0.0 2.05E4
    REV/5.592E20 -1.27E0 8.217E4/
IC4H8+C3H5-T=IC4H7+C3H6    7.94E11 0.0 2.05E4
    REV/5.592E20 -1.27E0 8.017E4/
IC4H8+OH=IC4H7+H2O    5.2E6 2.0 -2.98E2
    REV/1.025E7 1.922E0 3.027E4/
IC4H8+O=IC3H7+HCO    1.58E7 1.76 -1.216E3
    REV/4.538E0 3.06E0 2.169E4/
IC4H8+CH3O2=IC4H7+CH3O2H    1.928E4 2.6 1.391E4
    REV/4.034E7 1.488E0 1.199E4/
IC4H7+O2=IC3H5CHO+OH    2.47E13 -0.45 2.302E4
    REV/3.372E13 -5.77E-1 7.301E4/
IC4H7+O2=CH3COCH2+CH2O    7.14E15 -1.21 2.105E4
    REV/1.7E12 -4.07E-1 8.825E4/
IC4H7+O2=>C3H4-A+CH2O+OH    7.29E29 -5.71 2.145E4
IC4H7+O=IC3H5CHO+H    6.03E13 0.0 0.0E0
    REV/2.844E16 -5.19E-1 6.673E4/
IC4H7=C3H4-A+CH3    1.23E47 -9.74 7.426E4
    REV/1.649E38 -7.768E0 2.254E4/
IC3H5CHO+OH=IC3H5CO+H2O    2.69E10 0.76 -3.4E2
    REV/4.4E10 7.8E-1 3.608E4/
IC3H5CHO+HO2=IC3H5CO+H2O2    1.0E12 0.0 1.192E4
    REV/9.709E12 -3.1E-1 1.688E4/
IC3H5CHO+CH3=IC3H5CO+CH4    3.98E12 0.0 8.7E3
    REV/3.928E13 2.0E-2 3.045E4/
IC3H5CHO+O=IC3H5CO+OH    7.18E12 0.0 1.389E3
    REV/1.191E12 2.0E-2 2.056E4/
IC3H5CHO+O2=IC3H5CO+HO2    2.0E13 0.0 4.07E4
    REV/1.824E11 3.11E-1 5.337E3/
IC3H5CHO+H=IC3H5CO+H2    2.6E12 0.0 2.6E3
    REV/9.822E11 2.0E-2 2.387E4/
IC3H5CO=C3H5-T+CO    1.278E20 -1.89 3.446E4
    REV/1.51E11 0.0E0 4.809E3/
IC4H7OH=IC4H7+OH    7.31E16 -0.41 7.97E4
    REV/3.0E13 0.0E0 0.0E0/
IC3H5OH=C3H5-T+OH    7.369E19 -0.94 1.091E5
    REV/5.0E13 0.0E0 0.0E0/
!REV FROM THERMO ABOVE COLLISIONAL.
IC4H7OH=CH2CCH2OH+CH3    1.247E20 -0.98 9.857E4
    REV/3.0E13 0.0E0 0.0E0/
CH2CCH2OH+O2=>CH2OH+CO+CH2O    4.335E12 0.0 0.0E0
CH2CCH2OH=C2H2+CH2OH    2.163E40 -8.31 4.511E4
    REV/1.61E40 -8.58E0 2.033E4/
CH2CCH2OH=C3H4-A+OH    6.697E16 -1.11 4.258E4
    REV/8.5E12 0.0E0 2.0E3/
C5H11-1=C2H4+NC3H7    3.205E12 0.451 2.943E4
    REV/8.8E3 2.48E0 6.13E3/
C5H11-1=H+C5H10-1    3.354E11 0.608 3.564E4
    REV/2.5E11 5.1E-1 2.62E3/
C5H11-1=C5H11-2    3.875E9 0.353 1.976E4
    REV/1.602E8 7.56E-1 2.22E4/
C5H11-2=C3H6+C2H5    1.223E12 0.635 2.936E4
    REV/8.8E3 2.48E0 6.13E3/
C5H11-2=C5H10-1+H    2.353E10 1.011 3.668E4
    REV/4.24E11 5.1E-1 1.23E3/
C5H11-2=C5H10-2+H    3.988E11 0.41 3.522E4
    REV/2.5E11 5.1E-1 2.62E3/
C5H10-1=C2H5+C3H5-A    9.864E21 -2.086 7.506E4
    REV/4.0E12 0.0E0 -5.96E2/
C5H10-1+H=C5H91-3+H2    3.376E5 2.36 2.07E2
    REV/3.096E5 2.53E0 2.032E4/
C5H10-1+H=C5H91-4+H2    1.17E7 2.4 4.471E3
    REV/2.777E2 3.17E0 1.124E4/
C5H10-1+O=C5H91-3+OH    6.6E5 2.43 1.21E3
    REV/2.658E5 2.6E0 1.923E4/
C5H10-1+O=C5H91-4+OH    5.51E5 2.45 2.83E3
    REV/5.169E1 3.22E0 7.505E3/
C5H10-1+OH=C5H91-3+H2O    2.764E4 2.64 -1.919E3
    REV/1.097E5 2.81E0 3.335E4/
C5H10-1+OH=C5H91-4+H2O    4.67E7 1.61 -3.5E1
    REV/4.319E4 2.38E0 2.189E4/
C5H10-1+CH3=C5H91-3+CH4    3.69E0 3.31 4.002E3
    REV/8.84E1 3.48E0 2.459E4/
C5H10-1+CH3=C5H91-4+CH4    1.36E1 3.46 5.481E3
    REV/8.426E-3 4.23E0 1.273E4/
C5H10-1+O2=C5H91-3+HO2    2.2E12 0.0 3.722E4
    REV/3.665E10 4.9E-1 -1.52E2/
C5H10-1+O2=C5H91-4+HO2    2.0E13 0.0 4.964E4
    REV/7.76E7 1.09E0 -1.072E3/
C5H10-1+HO2=C5H91-3+H2O2    4.82E3 2.55 1.053E4
    REV/1.136E5 2.39E0 1.433E4/
C5H10-1+HO2=C5H91-4+H2O2    9.64E3 2.6 1.391E4
    REV/5.292E1 3.04E0 4.372E3/
C5H10-1+CH3O2=C5H91-3+CH3O2H    4.82E3 2.55 1.053E4
    REV/2.366E5 2.21E0 1.131E4/
C5H10-1+CH3O2=C5H91-4+CH3O2H    9.64E3 2.6 1.391E4
    REV/1.102E2 2.86E0 1.352E3/
C5H10-1+CH3O=C5H91-3+CH3OH    4.0E1 2.9 8.609E3
    REV/1.769E1 3.09E0 2.699E4/
C5H10-1+CH3O=C5H91-4+CH3OH    1.45E11 0.0 4.571E3
    REV/1.493E7 7.9E-1 9.611E3/
C5H10-2+H=C5H91-3+H2    1.73E5 2.5 2.492E3
    REV/4.561E6 2.06E0 1.975E4/
C5H10-2+H=C5H92-4+H2    3.376E5 2.36 2.07E2
    REV/4.361E6 2.1E0 2.033E4/
C5H10-2+O=C5H91-3+OH    4.41E5 2.42 3.15E3
    REV/5.107E6 1.98E0 1.831E4/
C5H10-2+O=C5H92-4+OH    9.9E5 2.43 1.21E3
    REV/5.617E6 2.17E0 1.924E4/
C5H10-2+OH=C5H91-3+H2O    3.12E6 2.0 -2.98E2
    REV/3.562E8 1.56E0 3.211E4/
C5H10-2+OH=C5H92-4+H2O    2.764E4 2.64 -1.919E3
    REV/1.546E6 2.38E0 3.336E4/
C5H10-2+CH3=C5H91-3+CH4    2.21E0 3.5 5.675E3
    REV/1.522E3 3.06E0 2.341E4/
C5H10-2+CH3=C5H92-4+CH4    3.69E0 3.31 4.002E3
    REV/1.245E3 3.05E0 2.461E4/
C5H10-2+O2=C5H91-3+HO2    3.3E12 0.0 3.99E4
    REV/1.581E12 -1.1E-1 -3.26E2/
C5H10-2+O2=C5H92-4+HO2    2.2E12 0.0 3.722E4
    REV/5.163E11 7.0E-2 -1.36E2/
C5H10-2+HO2=C5H91-3+H2O2    9.639E3 2.6 1.391E4
    REV/6.532E6 1.84E0 1.486E4/
C5H10-2+HO2=C5H92-4+H2O2    4.82E3 2.55 1.053E4
    REV/1.6E6 1.96E0 1.435E4/
C5H10-2+CH3O2=C5H91-3+CH3O2H    9.639E3 2.6 1.391E4
    REV/1.36E7 1.66E0 1.184E4/
C5H10-2+CH3O2=C5H92-4+CH3O2H    4.82E3 2.55 1.053E4
    REV/3.332E6 1.79E0 1.133E4/
C5H10-2+CH3O=C5H91-3+CH3OH    9.0E1 2.95 1.199E4
    REV/1.144E3 2.54E0 2.751E4/
C5H10-2+CH3O=C5H92-4+CH3OH    4.0E1 2.9 8.609E3
    REV/2.491E2 2.67E0 2.701E4/
C5H91-3+HO2=C5H9O1-3+OH    9.64E12 0.0 0.0E0
    REV/6.088E15 -1.07E0 1.572E4/
C5H91-3+CH3O2=C5H9O1-3+CH3O    9.64E12 0.0 0.0E0
    REV/5.946E17 -1.65E0 2.048E4/
C5H91-3+C2H5O2=C5H9O1-3+C2H5O    9.64E12 0.0 0.0E0
    REV/3.893E14 -7.2E-1 1.833E4/
C5H91-3=C4H6+CH3    7.554E14 -0.52 3.852E4
    REV/1.0E11 0.0E0 7.8E3/
C5H91-3=C5H81-3+H    4.733E11 0.636 4.264E4
    REV/2.5E11 5.1E-1 2.62E3/
C5H91-4=C3H6+C2H3    5.814E11 0.17 3.585E4
    REV/1.0E11 0.0E0 7.8E3/
C5H92-4=C5H81-3+H    2.015E15 -0.34 4.603E4
    REV/1.0E13 0.0E0 1.2E3/
C5H9O1-3=C2H3CHO+C2H5    3.131E19 -1.85 1.067E4
    REV/1.0E11 0.0E0 9.6E3/
C5H9O1-3=C2H5CHO+C2H3    1.417E18 -1.56 2.334E4
    REV/1.0E11 0.0E0 9.6E3/
C5H81-3+OH=CH2O+C4H71-3    1.0E12 0.0 0.0E0
    REV/1.0E11 0.0E0 1.5E4/
C5H81-3+OH=C2H3CHO+C2H5    1.0E12 0.0 0.0E0
    REV/1.0E11 0.0E0 1.5E4/
C5H81-3+OH=CH3CHO+C3H5-S    1.0E12 0.0 0.0E0
    REV/1.0E11 0.0E0 1.5E4/
C5H10-2=CH3+C4H71-3    6.486E19 -1.367 7.632E4
    REV/8.0E12 0.0E0 -5.96E2/
C5H11-1+O2=C5H10-1+HO2    8.37E-1 3.59 1.196E4
    REV/1.307E0 3.42E0 2.781E4/
C5H11-2+O2=C5H10-1+HO2    5.35E-1 3.71 9.322E3
    REV/2.021E1 3.137E0 2.274E4/
C5H11-2+O2=C5H10-2+HO2    1.07E0 3.71 9.322E3
    REV/1.406E0 3.738E0 2.559E4/
C5H11-1+HO2=C5H11O-1+OH    9.0E12 0.0 -1.0E3
    REV/1.944E15 -4.79E-1 2.621E4/
C5H11-1+CH3O2=C5H11O-1+CH3O    9.0E12 0.0 -1.0E3
    REV/1.216E14 -1.8E-1 3.045E4/
C5H11-1+C5H11O2-1=2C5H11O-1    9.0E12 0.0 -1.0E3
    REV/5.94E13 -1.3E-1 2.991E4/
C5H11O2-1+CH3O2=>O2+C5H11O-1+CH3O    1.4E16 -1.61 1.86E3
2C5H11O2-1=>O2+2C5H11O-1    1.4E16 -1.61 1.86E3
H2O2+C5H11O2-1=HO2+C5H11O2H-1    2.4E12 0.0 1.0E4
    REV/2.4E12 0.0E0 1.0E4/
C5H11O2-1+HO2=C5H11O2H-1+O2    1.75E10 0.0 -3.275E3
    REV/3.746E13 -7.91E-1 3.362E4/
C5H11O2H-1=C5H11O-1+OH    1.5E16 0.0 4.25E4
    REV/2.927E7 1.932E0 -3.022E3/
C5H11O-1=CH2O+PC4H9    5.661E20 -2.247 2.496E4
    REV/6.25E10 0.0E0 1.19E4/
C5H11O2-1=C5H11-1+O2    2.338E20 -1.62 3.583E4
    REV/4.52E12 0.0E0 0.0E0/
C5H11O2-2=C5H11-2+O2    7.087E22 -2.287 3.815E4
    REV/7.54E12 0.0E0 0.0E0/
C5H11O2-1=C5H10OOH1-3    2.5E10 0.0 2.085E4
    REV/2.604E9 -1.06E-1 7.85E3/
C5H11O2-2=C5H10OOH2-4    2.5E10 0.0 2.085E4
    REV/3.372E9 -1.4E-1 7.9E3/
C5H11O2-1=C5H10-1+HO2    5.044E38 -8.11 4.049E4
    REV/1.523E31 -6.66E0 2.051E4/
C5H11O2-2=C5H10-1+HO2    5.075E42 -9.41 4.149E4
    REV/2.039E34 -7.696E0 1.675E4/
C5H11O2-2=C5H10-2+HO2    5.044E38 -8.11 4.049E4
    REV/7.05E28 -5.795E0 1.86E4/
C5H10OOH1-3=>C5H10O1-3+OH    7.5E10 0.0 1.525E4
C5H10O1-3+OH=>C2H4+C2H5CO+H2O    2.5E12 0.0 0.0E0
C5H10O1-3+OH=>HCO+C4H8-1+H2O    2.5E12 0.0 0.0E0
C5H10O1-3+HO2=>C2H4+C2H5CO+H2O2    5.0E12 0.0 1.77E4
C5H10O1-3+HO2=>HCO+C4H8-1+H2O2    5.0E12 0.0 1.77E4
C5H10OOH1-3=>OH+CH2O+C4H8-1    8.283E13 -0.17 3.009E4
C5H10OOH2-4=>OH+CH3CHO+C3H6    8.312E17 -1.4 2.717E4
C5H10OOH1-3O2=C5H10OOH1-3+O2    8.039E22 -2.295 3.797E4
    REV/7.54E12 0.0E0 0.0E0/
C5H10OOH1-3O2=NC5KET13+OH    2.5E10 0.0 2.1E4
    REV/1.109E3 1.533E0 4.474E4/
NC5KET13=>C2H5CHO+CH2CHO+OH    1.05E16 0.0 4.16E4
C6H13-1+HO2=C6H13O-1+OH    7.0E12 0.0 -1.0E3
    REV/3.266E15 -5.6E-1 2.615E4/
C6H13-1+CH3O2=C6H13O-1+CH3O    7.0E12 0.0 -1.0E3
    REV/2.043E14 -2.6E-1 3.039E4/
C6H13-1+O2=C6H12-1+HO2    3.0E-19 0.0 3.0E3
    REV/2.0E-19 0.0E0 1.75E4/
C6H13-2+O2=C6H12-1+HO2    4.5E-19 0.0 5.02E3
    REV/2.0E-19 0.0E0 1.75E4/
C6H13-2+O2=C6H12-2+HO2    3.0E-19 0.0 3.0E3
    REV/2.0E-19 0.0E0 1.75E4/
C6H13-1=C2H4+PC4H9    6.391E19 -1.97 3.064E4
    REV/3.3E11 0.0E0 7.2E3/
C6H13-1=C6H12-1+H    9.621E13 -0.26 3.6E4
    REV/1.0E13 0.0E0 2.9E3/
C6H13-2=C3H6+NC3H7    1.827E19 -1.8 3.017E4
    REV/1.5E11 0.0E0 7.2E3/
C6H13-2=C6H12-1+H    6.248E12 0.09 3.682E4
    REV/1.0E13 0.0E0 1.2E3/
C6H13-2=C6H12-2+H    1.271E13 -0.09 3.565E4
    REV/1.0E13 0.0E0 2.9E3/
C6H13-1=C6H13-2    5.478E8 1.62 3.876E4
    REV/3.558E7 1.97E0 4.127E4/
C6H12-1=NC3H7+C3H5-A    1.0E16 0.0 7.1E4
    REV/1.0E13 0.0E0 0.0E0/
C6H12-2=C2H5+C4H71-3    1.0E16 0.0 7.1E4
    REV/1.0E13 0.0E0 0.0E0/
C6H12-1+OH=>C5H11-1+CH2O    1.0E11 0.0 -4.0E3
C6H12-2+OH=>PC4H9+CH3CHO    1.0E11 0.0 -4.0E3
C6H12-1+O=>C5H11-1+HCO    1.0E11 0.0 -1.05E3
C6H12-2+O=>PC4H9+CH3CO    1.0E11 0.0 -1.05E3
C6H12-1+H=C6H111-3+H2    3.376E5 2.36 2.07E2
    REV/4.378E6 2.1E0 2.033E4/
C6H12-1+H=C6H111-4+H2    1.17E7 2.4 4.471E3
    REV/3.896E3 2.74E0 1.125E4/
C6H12-1+H=C6H111-5+H2    1.17E7 2.4 4.471E3
    REV/3.896E3 2.74E0 1.125E4/
C6H12-1+H=C6H111-6+H2    6.65E5 2.54 6.756E3
    REV/3.12E4 2.54E0 1.103E4/
C6H12-1+OH=C6H111-3+H2O    2.764E4 2.64 -1.919E3
    REV/1.552E6 2.38E0 3.336E4/
C6H12-1+OH=C6H111-4+H2O    4.67E7 1.61 -3.5E1
    REV/6.06E5 1.95E0 2.19E4/
C6H12-1+OH=C6H111-5+H2O    4.67E7 1.61 -3.5E1
    REV/6.06E5 1.95E0 2.19E4/
C6H12-1+OH=C6H111-6+H2O    5.27E9 0.97 1.586E3
    REV/1.071E9 9.7E-1 2.101E4/
C6H12-1+CH3=C6H111-3+CH4    3.69E0 3.31 4.002E3
    REV/1.25E3 3.05E0 2.46E4/
C6H12-1+CH3=C6H111-4+CH4    1.36E1 3.46 5.481E3
    REV/1.182E-1 3.8E0 1.274E4/
C6H12-1+CH3=C6H111-5+CH4    1.36E1 3.46 5.481E3
    REV/1.182E-1 3.8E0 1.274E4/
C6H12-1+CH3=C6H111-6+CH4    4.521E-1 3.65 7.154E3
    REV/5.541E-1 3.65E0 1.19E4/
!
!
!
!!!!4.820E+03 2.55 1.053E+04 MM
C6H12-1+HO2=C6H111-3+H2O2    9.64E3 2.55 1.053E4
!!REV/ 1.606E+06 1.96 1.434E+04 /
C6H12-1+HO2=C6H111-4+H2O2    9.64E3 2.6 1.391E4
!!REV/ 7.425E+02 2.61 4.382E+03 /
C6H12-1+HO2=C6H111-5+H2O2    9.64E3 2.6 1.391E4
!!REV/ 7.425E+02 2.61 4.382E+03 /
C6H12-1+HO2=C6H111-6+H2O2    2.38E4 2.55 1.649E4
!!REV/ 2.870E+04 2.22 4.456E+03 /
!
!
C6H12-1+CH3O2=C6H111-3+CH3O2H    4.82E3 2.55 1.053E4
    REV/3.345E6 1.79E0 1.132E4/
C6H12-1+CH3O2=C6H111-4+CH3O2H    9.64E3 2.6 1.391E4
    REV/1.546E3 2.44E0 1.362E3/
C6H12-1+CH3O2=C6H111-5+CH3O2H    9.64E3 2.6 1.391E4
    REV/1.546E3 2.44E0 1.362E3/
C6H12-1+CH3O2=C6H111-6+CH3O2H    2.38E4 2.55 1.649E4
    REV/5.976E4 2.04E0 1.436E3/
C6H12-1+CH3O=C6H111-3+CH3OH    4.0E1 2.9 8.609E3
    REV/2.501E2 2.67E0 2.7E4/
C6H12-1+CH3O=C6H111-4+CH3OH    1.45E11 0.0 4.571E3
    REV/2.095E8 3.7E-1 9.621E3/
C6H12-1+CH3O=C6H111-5+CH3OH    1.45E11 0.0 4.571E3
    REV/2.095E8 3.7E-1 9.621E3/
C6H12-1+CH3O=C6H111-6+CH3OH    2.17E11 0.0 6.458E3
    REV/4.908E9 2.0E-2 8.998E3/
C6H12-2+H=C6H111-3+H2    1.73E5 2.5 2.492E3
    REV/4.563E6 2.06E0 1.974E4/
C6H12-2+H=C6H112-4+H2    3.376E5 2.36 2.07E2
    REV/4.384E6 2.1E0 2.033E4/
C6H12-2+H=C6H112-5+H2    1.17E7 2.4 4.471E3
    REV/3.921E3 2.74E0 1.125E4/
C6H12-2+H=C6H112-6+H2    6.651E5 2.54 6.756E3
    REV/3.122E4 2.53E0 1.103E4/
C6H12-2+OH=C6H111-3+H2O    3.12E6 2.0 -2.98E2
    REV/3.563E8 1.56E0 3.211E4/
C6H12-2+OH=C6H112-4+H2O    2.764E4 2.64 -1.919E3
    REV/1.554E6 2.38E0 3.336E4/
C6H12-2+OH=C6H112-5+H2O    4.67E5 1.61 -3.5E1
    REV/6.099E3 1.95E0 2.19E4/
C6H12-2+OH=C6H112-6+H2O    5.27E9 0.97 1.586E3
    REV/1.071E9 9.6E-1 2.101E4/
C6H12-2+CH3=C6H111-3+CH4    2.21E0 3.5 5.675E3
    REV/1.523E3 3.06E0 2.341E4/
C6H12-2+CH3=C6H112-4+CH4    3.69E0 3.31 4.002E3
    REV/1.252E3 3.05E0 2.46E4/
C6H12-2+CH3=C6H112-5+CH4    1.36E1 3.46 5.481E3
    REV/1.19E-1 3.8E0 1.274E4/
C6H12-2+CH3=C6H112-6+CH4    4.521E-1 3.65 7.154E3
    REV/5.543E-1 3.64E0 1.19E4/
C6H12-2+HO2=C6H111-3+H2O2    9.639E3 2.6 1.391E4
    REV/6.534E6 1.84E0 1.485E4/
C6H12-2+HO2=C6H112-4+H2O2    4.82E3 2.55 1.053E4
    REV/1.609E6 1.96E0 1.434E4/
C6H12-2+HO2=C6H112-5+H2O2    9.64E3 2.6 1.391E4
    REV/7.473E2 2.61E0 4.382E3/
C6H12-2+HO2=C6H112-6+H2O2    2.38E4 2.55 1.649E4
    REV/2.871E4 2.22E0 4.456E3/
C6H12-2+CH3O2=C6H111-3+CH3O2H    9.639E3 2.6 1.391E4
    REV/1.361E7 1.66E0 1.183E4/
C6H12-2+CH3O2=C6H112-4+CH3O2H    4.82E3 2.55 1.053E4
    REV/3.35E6 1.79E0 1.132E4/
C6H12-2+CH3O2=C6H112-5+CH3O2H    9.64E3 2.6 1.391E4
    REV/1.556E3 2.44E0 1.362E3/
C6H12-2+CH3O2=C6H112-6+CH3O2H    2.38E4 2.55 1.649E4
    REV/5.978E4 2.04E0 1.436E3/
C6H12-2+CH3O=C6H111-3+CH3OH    9.0E1 2.95 1.199E4
    REV/1.144E3 2.54E0 2.751E4/
C6H12-2+CH3O=C6H112-4+CH3OH    4.0E1 2.9 8.609E3
    REV/2.504E2 2.66E0 2.7E4/
C6H12-2+CH3O=C6H112-5+CH3OH    1.45E11 0.0 4.571E3
    REV/2.109E8 3.7E-1 9.621E3/
C6H12-2+CH3O=C6H112-6+CH3OH    2.17E11 0.0 6.458E3
    REV/4.91E9 2.0E-2 8.998E3/
C6H111-6=C6H111-3    1.113E12 0.0 3.17E4
    REV/3.076E14 -2.5E-1 4.755E4/
C6H13O2-1=C6H13-1+O2    5.15E20 -1.71 3.579E4
    REV/4.52E12 0.0E0 0.0E0/
C6H13-1+C6H13O2-1=2C6H13O-1    7.0E12 0.0 -1.0E3
    REV/9.781E13 -2.1E-1 2.984E4/
C6H13O2-1=C6H12-1+HO2    5.044E38 -8.11 4.049E4
    REV/9.638E29 -6.22E0 2.047E4/
C6H13O2-1=C6H12OOH1-2    2.0E11 0.0 2.685E4
    REV/2.402E10 -1.2E-1 1.386E4/
C6H13O2-1=C6H12OOH1-3    2.5E10 0.0 2.085E4
    REV/3.003E9 -1.2E-1 7.86E3/
C6H13O2-1=C6H12OOH1-4    3.125E9 0.0 1.865E4
    REV/3.754E8 -1.2E-1 6.06E3/
C6H13O2-1+CH3O2=>C6H13O-1+CH3O+O2    1.4E16 -1.61 1.86E3
2C6H13O2-1=>O2+2C6H13O-1    1.4E16 -1.61 1.86E3
C6H13O-1=C5H11-1+CH2O    5.226E20 -2.08 2.483E4
    REV/1.0E11 0.0E0 1.19E4/
C6H12OOH1-3=>C6H12O1-3+OH    7.5E10 0.0 1.525E4
C6H12OOH1-4=>C6H12O1-4+OH    9.375E9 0.0 7.0E3
!C6H12OOH1-2(=)C6H12-1+HO2 1.018E+19 -2.02 1.972E+04    !!!MOVED DOWN
!REV/ 1.620E+11 0.00 1.269E+04 /
!C6H12OOH2-1(=)C6H12-1+HO2 3.701E+21 -2.69 2.203E+04
!REV/ 1.620E+11 0.00 1.269E+04 /
!C6H12OOH2-3(=)C6H12-2+HO2 3.663E+20 -2.48 2.164E+04
!REV/ 1.620E+11 0.00 1.269E+04 /
!C6H12OOH3-2(=)C6H12-2+HO2 3.663E+20 -2.48 2.164E+04
!REV/ 1.620E+11 0.00 1.269E+04 /
!C6H12OOH3-4(=)C6H12-3+HO2 2.682E+20 -2.41 2.173E+04
!REV/ 3.236E+11 0.00 1.269E+04 /
C6H12OOH1-3=>OH+CH2O+C5H10-1    7.703E13 -0.16 3.009E4
C6H12OOH1-2O2=C6H12OOH1-2+O2    8.868E22 -2.31 3.798E4
    REV/7.54E12 0.0E0 0.0E0/
C6H12OOH1-3O2=C6H12OOH1-3+O2    8.868E22 -2.31 3.798E4
    REV/7.54E12 0.0E0 0.0E0/
C6H12OOH1-2O2=NC6KET12+OH    2.0E11 0.0 2.6E4
    REV/2.607E-12 6.14E0 3.97E4/
C6H12OOH1-3O2=NC6KET13+OH    2.5E10 0.0 2.1E4
    REV/8.825E2 1.56E0 4.471E4/
NC6KET12=>NC4H9CHO+HCO+OH    1.0E16 0.0 3.9E4
NC6KET13=>NC3H7CHO+CH2CHO+OH    1.0E16 0.0 3.9E4
C6H12O1-3+OH=>C5H10-1+HCO+H2O    2.5E12 0.0 0.0E0
C6H12O1-4+OH=>C4H8-1+CH2CHO+H2O    2.5E12 0.0 0.0E0
C6H12O1-3+OH=>C2H4+NC3H7CO+H2O    2.5E12 0.0 0.0E0
C6H12O1-4+OH=>C2H4+C2H5COCH2+H2O    2.5E12 0.0 0.0E0
C6H12O1-3+HO2=>C5H10-1+HCO+H2O2    5.0E12 0.0 1.77E4
C6H12O1-4+HO2=>C4H8-1+CH2CHO+H2O2    5.0E12 0.0 1.77E4
C6H12O1-3+HO2=>C2H4+NC3H7CO+H2O2    5.0E12 0.0 1.77E4
C6H12O1-4+HO2=>C2H4+C2H5COCH2+H2O2    5.0E12 0.0 1.77E4
!
!
!
C6H12OH-2=C6H12-2+OH    1.065E16 -1.0 2.933E4
    REV/1.0E12 0.0E0 -1.042E3/
NC4H9CHO+O2=NC4H9CO+HO2    2.0E13 0.5 4.22E4
    REV/1.0E7 0.0E0 4.0E4/
NC4H9CHO+OH=NC4H9CO+H2O    2.69E10 0.76 -3.4E2
    REV/2.143E10 7.3E-1 3.124E4/
NC4H9CHO+H=NC4H9CO+H2    4.0E13 0.0 4.2E3
    REV/1.8E13 0.0E0 2.4E4/
NC4H9CHO+O=NC4H9CO+OH    5.0E12 0.0 1.79E3
    REV/1.0E12 0.0E0 1.9E4/
NC4H9CHO+HO2=NC4H9CO+H2O2    2.8E12 0.0 1.36E4
    REV/1.0E12 0.0E0 1.0E4/
NC4H9CHO+CH3=NC4H9CO+CH4    1.7E12 0.0 8.44E3
    REV/1.5E13 0.0E0 2.8E4/
NC4H9CHO+CH3O=NC4H9CO+CH3OH    1.15E11 0.0 1.28E3
    REV/3.0E11 0.0E0 1.8E4/
NC4H9CHO+CH3O2=NC4H9CO+CH3O2H    1.0E12 0.0 9.5E3
    REV/2.5E10 0.0E0 1.0E4/
NC4H9CHO+OH=C4H8CHO-2+H2O    4.67E7 1.61 -3.5E1
    REV/6.837E5 1.93E0 2.192E4/
NC4H9CHO+OH=C4H8CHO-4+H2O    4.67E7 1.61 -3.5E1
    REV/1.202E9 1.34E0 2.887E4/
NC4H9CO=PC4H9+CO    1.0E11 0.0 9.6E3
    REV/1.0E11 0.0E0 0.0E0/
C4H8CHO-2=C3H6+CH2CHO    2.984E14 -0.76 2.332E4
    REV/1.0E11 0.0E0 7.8E3/
C4H8CHO-4=C2H3CHO+C2H5    1.863E18 -1.3 3.083E4
    REV/1.0E11 0.0E0 7.8E3/
AC3H5CHO=C3H5-A+HCO    1.813E19 -1.08 6.848E4
    REV/1.0E13 0.0E0 0.0E0/
AC3H5CHO+OH=AC3H5CO+H2O    2.69E10 0.76 -3.4E2
    REV/1.741E10 7.6E-1 3.12E4/
AC3H5CHO+OH=C2H3CHCHO+H2O    3.12E6 2.0 -2.98E2
    REV/1.246E8 1.79E0 3.493E4/
AC3H5CHO+HO2=AC3H5CO+H2O2    3.0E12 0.0 1.192E4
    REV/1.152E13 -3.3E-1 1.199E4/
AC3H5CHO+HO2=C2H3CHCHO+H2O2    9.63E3 2.6 1.391E4
    REV/2.283E6 2.06E0 1.767E4/
AC3H5CHO+CH3O2=AC3H5CO+CH3O2H    1.0E12 0.0 1.192E4
    REV/1.579E13 -5.1E-1 1.127E4/
AC3H5CHO+CH3O2=C2H3CHCHO+CH3O2H    1.99E12 0.0 1.705E4
    REV/1.939E15 -7.2E-1 2.009E4/
AC3H5CO=C3H5-A+CO    6.199E15 -1.09 -3.3E2
    REV/1.5E11 0.0E0 4.81E3/
NC3H7COCH3+OH=NC3H7COCH2+H2O    5.1E11 0.0 1.192E3
    REV/9.286E13 -7.4E-1 2.773E4/
NC3H7COCH3+HO2=NC3H7COCH2+H2O2    2.38E4 2.55 1.469E4
    REV/2.572E7 1.48E0 9.762E3/
NC3H7COCH3+CH3O2=NC3H7COCH2+CH3O2H    3.01E12 0.0 1.758E4
    REV/1.337E16 -1.25E0 1.193E4/
NC3H7COCH2=NC3H7+CH2CO    1.226E18 -1.4 4.345E4
    REV/1.0E11 0.0E0 1.16E4/
C2H5COC2H5+OH=C2H5COC2H4P+H2O    1.054E10 0.97 1.586E3
    REV/1.194E9 9.5E-1 2.103E4/
C2H5COC2H5+HO2=C2H5COC2H4P+H2O2    4.76E4 2.55 1.649E4
    REV/3.201E4 2.2E0 4.472E3/
C2H5COC2H5+O2=C2H5COC2H4P+HO2    4.1E13 0.0 5.131E4
    REV/1.949E10 3.1E-1 -1.882E3/
C2H5COC2H5+H=C2H5COC2H4P+H2    1.832E7 2.0 7.7E3
    REV/4.794E5 1.98E0 1.199E4/
C2H5COC2H5+C2H3=C2H5COC2H4P+C2H4    1.0E12 0.0 1.04E4
    REV/3.85E8 8.1E-1 1.404E4/
C2H5COC2H5+C2H5=C2H5COC2H4P+C2H6    1.0E11 0.0 1.34E4
    REV/1.07E13 -5.8E-1 1.4E4/
C2H5COC2H5+CH3O=C2H5COC2H4P+CH3OH    4.34E11 0.0 6.46E3
    REV/5.475E9 0.0E0 9.02E3/
C2H5COC2H5+CH3O2=C2H5COC2H4P+CH3O2H    6.02E12 0.0 1.938E4
    REV/1.664E13 -5.2E-1 6.642E3/
C2H5COC2H4P=C2H5CO+C2H4    1.769E17 -1.46 2.954E4
    REV/8.0E10 0.0E0 1.13E4/
!
!
!
!
!
!
C7H15-1=C5H11-1+C2H4    1.227E19 -1.91 3.14E4
    REV/1.0E11 0.0E0 8.2E3/
C7H15-1=C7H14-1+H    9.648E13 -0.26 3.601E4
    REV/1.0E13 0.0E0 2.9E3/
C7H15-2=PC4H9+C3H6    9.764E18 -1.79 3.136E4
    REV/1.0E11 0.0E0 8.2E3/
C7H15-2=C7H14-1+H    6.067E12 0.09 3.681E4
    REV/1.0E13 0.0E0 1.2E3/
C7H15-2=C7H14-2+H    1.229E13 -0.08 3.564E4
    REV/1.0E13 0.0E0 2.9E3/
C7H15-3=C4H8-1+NC3H7    6.165E18 -1.71 3.096E4
    REV/1.0E11 0.0E0 7.7E3/
C7H15-3=C6H12-1+CH3    2.698E17 -1.35 3.148E4
    REV/1.75E11 0.0E0 7.2E3/
C7H15-3=C7H14-2+H    1.229E13 -0.08 3.564E4
    REV/1.0E13 0.0E0 2.9E3/
C7H15-3=C7H14-3+H    9.152E12 -0.02 3.573E4
    REV/1.0E13 0.0E0 2.9E3/
C7H15-4=C2H5+C5H10-1    1.143E18 -1.34 3.143E4
    REV/1.0E11 0.0E0 8.2E3/
C7H15-4=C7H14-3+H    1.819E13 -0.02 3.573E4
    REV/1.0E13 0.0E0 2.9E3/
!
!
!
!
C7H15-1+O2=C7H14-1+HO2    3.0E-9 0.0 3.0E3
    REV/6.517E-10 1.8E-1 1.876E4/
C7H15-2+O2=C7H14-1+HO2    4.5E-9 0.0 5.02E3
    REV/1.532E-8 -1.6E-1 1.827E4/
C7H15-2+O2=C7H14-2+HO2    3.0E-9 0.0 3.0E3
    REV/5.04E-9 1.0E-2 1.912E4/
C7H15-3+O2=C7H14-2+HO2    3.0E-9 0.0 3.0E3
    REV/5.04E-9 1.0E-2 1.912E4/
C7H15-3+O2=C7H14-3+HO2    3.0E-9 0.0 3.0E3
    REV/6.769E-9 -5.0E-2 1.903E4/
C7H15-4+O2=C7H14-3+HO2    6.0E-9 0.0 3.0E3
    REV/6.795E-9 -5.0E-2 1.903E4/
!
!
!
C7H15-1=C7H15-3    1.386E9 0.98 3.376E4
    REV/8.716E7 1.33E0 3.627E4/
C7H15-1=C7H15-4    2.541E9 0.35 1.976E4
    REV/3.176E8 7.0E-1 2.227E4/
C7H15-2=C7H15-3    9.587E8 1.39 3.97E4
    REV/9.587E8 1.39E0 3.97E4/
C7H15-1=C7H15-2    5.478E8 1.62 3.876E4
    REV/3.445E7 1.97E0 4.127E4/
C7H14-1+H=C7H131-4+H2    1.17E7 2.4 4.471E3
    REV/3.834E3 2.74E0 1.154E4/
C7H14-1+H=C7H131-5+H2    1.17E7 2.4 4.471E3
    REV/3.834E3 2.74E0 1.154E4/
C7H14-1+H=C7H131-6+H2    1.17E7 2.4 4.471E3
    REV/3.834E3 2.74E0 1.154E4/
C7H14-1+OH=C7H131-4+H2O    4.67E7 1.61 -3.5E1
    REV/5.963E5 1.95E0 2.219E4/
C7H14-1+OH=C7H131-5+H2O    4.67E7 1.61 -3.5E1
    REV/5.963E5 1.95E0 2.219E4/
C7H14-1+OH=C7H131-6+H2O    4.67E7 1.61 -3.5E1
    REV/5.963E5 1.95E0 2.219E4/
C7H14-1+CH3=C7H131-4+CH4    1.36E1 3.46 5.481E3
    REV/1.163E-1 3.8E0 1.303E4/
C7H14-1+CH3=C7H131-5+CH4    1.36E1 3.46 5.481E3
    REV/1.163E-1 3.8E0 1.303E4/
C7H14-1+CH3=C7H131-6+CH4    1.36E1 3.46 5.481E3
    REV/1.163E-1 3.8E0 1.303E4/
C7H14-1+HO2=C7H131-4+H2O2    9.64E3 2.6 1.391E4
    REV/7.307E2 2.62E0 4.672E3/
C7H14-1+HO2=C7H131-5+H2O2    9.64E3 2.6 1.391E4
    REV/7.307E2 2.62E0 4.672E3/
C7H14-1+HO2=C7H131-6+H2O2    9.64E3 2.6 1.391E4
    REV/7.307E2 2.62E0 4.672E3/
C7H14-1+CH3O2=C7H131-4+CH3O2H    9.64E3 2.6 1.391E4
    REV/1.521E3 2.44E0 1.652E3/
C7H14-1+CH3O2=C7H131-5+CH3O2H    9.64E3 2.6 1.391E4
    REV/1.521E3 2.44E0 1.652E3/
C7H14-1+CH3O2=C7H131-6+CH3O2H    9.64E3 2.6 1.391E4
    REV/1.521E3 2.44E0 1.652E3/
C7H14-1+CH3O=C7H131-4+CH3OH    1.45E11 0.0 4.571E3
    REV/2.062E8 3.7E-1 9.911E3/
C7H14-1+CH3O=C7H131-5+CH3OH    1.45E11 0.0 4.571E3
    REV/2.062E8 3.7E-1 9.911E3/
C7H14-1+CH3O=C7H131-6+CH3OH    1.45E11 0.0 4.571E3
    REV/2.062E8 3.7E-1 9.911E3/
C7H14-2+H=C7H132-4+H2    3.376E5 2.36 2.07E2
    REV/4.4E6 2.1E0 2.059E4/
C7H14-2+H=C7H132-5+H2    1.17E7 2.4 4.471E3
    REV/3.843E3 2.74E0 1.152E4/
C7H14-2+OH=C7H132-4+H2O    2.764E4 2.64 -1.919E3
    REV/1.56E6 2.38E0 3.362E4/
C7H14-2+OH=C7H132-5+H2O    4.67E5 1.61 -3.5E1
    REV/5.978E3 1.95E0 2.217E4/
C7H14-2+CH3=C7H132-4+CH4    3.69E0 3.31 4.002E3
    REV/1.256E3 3.05E0 2.486E4/
C7H14-2+CH3=C7H132-5+CH4    1.36E1 3.46 5.481E3
    REV/1.166E-1 3.8E0 1.301E4/
C7H14-2+HO2=C7H132-4+H2O2    4.82E3 2.55 1.053E4
    REV/1.615E6 1.96E0 1.46E4/
C7H14-2+HO2=C7H132-5+H2O2    9.64E3 2.6 1.391E4
    REV/7.325E2 2.62E0 4.652E3/
C7H14-2+CH3O2=C7H132-4+CH3O2H    4.82E3 2.55 1.053E4
    REV/3.362E6 1.79E0 1.158E4/
C7H14-2+CH3O2=C7H132-5+CH3O2H    9.64E3 2.6 1.391E4
    REV/1.525E3 2.44E0 1.632E3/
C7H14-2+CH3O=C7H132-4+CH3OH    4.0E1 2.9 8.609E3
    REV/2.513E2 2.66E0 2.726E4/
C7H14-2+CH3O=C7H132-5+CH3OH    1.45E11 0.0 4.571E3
    REV/2.067E8 3.7E-1 9.891E3/
C7H14-3+H=C7H132-4+H2    3.376E5 2.36 2.07E2
    REV/3.276E6 2.16E0 2.068E4/
C7H14-3+H=C7H133-5+H2    3.376E5 2.36 2.07E2
    REV/4.38E6 2.1E0 2.056E4/
C7H14-3+H=C7H133-6+H2    1.17E7 2.4 4.471E3
    REV/3.916E3 2.74E0 1.149E4/
C7H14-3+OH=C7H132-4+H2O    2.764E4 2.64 -1.919E3
    REV/1.161E6 2.44E0 3.371E4/
C7H14-3+OH=C7H133-5+H2O    2.764E4 2.64 -1.919E3
    REV/1.552E6 2.38E0 3.359E4/
C7H14-3+OH=C7H133-6+H2O    4.67E7 1.61 -3.5E1
    REV/6.091E5 1.95E0 2.214E4/
C7H14-3+CH3=C7H132-4+CH4    3.69E0 3.31 4.002E3
    REV/9.355E2 3.11E0 2.495E4/
C7H14-3+CH3=C7H133-5+CH4    3.69E0 3.31 4.002E3
    REV/1.251E3 3.05E0 2.483E4/
C7H14-3+CH3=C7H133-6+CH4    1.36E1 3.46 5.481E3
    REV/1.188E-1 3.8E0 1.298E4/
C7H14-3+HO2=C7H132-4+H2O2    4.82E3 2.55 1.053E4
    REV/1.202E6 2.03E0 1.469E4/
C7H14-3+HO2=C7H133-5+H2O2    4.82E3 2.55 1.053E4
    REV/1.607E6 1.96E0 1.457E4/
C7H14-3+HO2=C7H133-6+H2O2    9.64E3 2.6 1.391E4
    REV/7.464E2 2.61E0 4.622E3/
C7H14-3+CH3O2=C7H132-4+CH3O2H    4.82E3 2.55 1.053E4
    REV/2.503E6 1.85E0 1.167E4/
C7H14-3+CH3O2=C7H133-5+CH3O2H    4.82E3 2.55 1.053E4
    REV/3.346E6 1.79E0 1.155E4/
C7H14-3+CH3O2=C7H133-6+CH3O2H    9.64E3 2.6 1.391E4
    REV/1.554E3 2.44E0 1.602E3/
C7H14-3+CH3O=C7H132-4+CH3OH    4.0E1 2.9 8.609E3
    REV/1.871E2 2.73E0 2.735E4/
C7H14-3+CH3O=C7H133-5+CH3OH    4.0E1 2.9 8.609E3
    REV/2.502E2 2.66E0 2.723E4/
C7H14-3+CH3O=C7H133-6+CH3OH    1.45E11 0.0 4.571E3
    REV/2.106E8 3.7E-1 9.861E3/
C7H131-4=C5H10-1+C2H3    2.492E12 0.03 3.73E4
    REV/8.5E10 0.0E0 8.3E3/
C7H131-4=C5H81-3+C2H5    2.289E14 -0.68 2.205E4
    REV/8.5E10 0.0E0 8.3E3/
C7H131-5=C4H8-1+C3H5-A    6.177E15 -1.18 1.798E4
    REV/5.0E10 0.0E0 8.3E3/
C7H131-6=C3H6+C4H71-4    1.238E17 -1.17 3.074E4
    REV/1.0E11 0.0E0 8.3E3/
C7H132-4+HO2=C7H13O2-4+OH    9.64E12 0.0 0.0E0
    REV/4.273E15 -1.02E0 1.543E4/
C7H132-4+CH3O2=C7H13O2-4+CH3O    9.64E12 0.0 0.0E0
    REV/4.173E17 -1.59E0 2.019E4/
C7H132-4+C2H5O2=C7H13O2-4+C2H5O    9.64E12 0.0 0.0E0
    REV/2.732E14 -6.7E-1 1.803E4/
C7H132-5=C4H8-1+C3H5-S    9.419E17 -1.49 4.426E4
    REV/1.0E11 0.0E0 8.3E3/
C7H133-5+HO2=C7H13O3-5+OH    9.64E12 0.0 0.0E0
    REV/1.182E15 -8.4E-1 1.527E4/
C7H133-5+CH3O2=C7H13O3-5+CH3O    9.64E12 0.0 0.0E0
    REV/1.155E17 -1.42E0 2.003E4/
C7H133-5+C2H5O2=C7H13O3-5+C2H5O    9.64E12 0.0 0.0E0
    REV/7.559E13 -5.0E-1 1.787E4/
C7H133-6=C3H6+C4H71-1    1.354E16 -0.92 4.356E4
    REV/1.0E11 0.0E0 8.3E3/
C7H13O2-4=SC3H5CHO+NC3H7    6.319E19 -1.93 1.113E4
    REV/1.0E11 0.0E0 9.6E3/
C7H13O2-4=NC3H7CHO+C3H5-S    1.012E22 -2.46 2.919E4
    REV/1.0E11 0.0E0 9.6E3/
C7H13O3-5=C4H7CHO1-1+C2H5    6.033E18 -1.62 1.045E4
    REV/1.0E11 0.0E0 9.6E3/
C7H13O3-5=C2H5CHO+C4H71-1    6.425E21 -2.43 3.009E4
    REV/1.0E11 0.0E0 9.6E3/
C7H14-1+OH=>CH2O+C6H13-1    1.0E11 0.0 -4.0E3
C7H14-1+OH=>CH3CHO+C5H11-1    1.0E11 0.0 -4.0E3
C7H14-2+OH=>CH3CHO+C5H11-1    1.0E11 0.0 -4.0E3
C7H14-2+OH=>C2H5CHO+PC4H9    1.0E11 0.0 -4.0E3
C7H14-3+OH=>C2H5CHO+PC4H9    1.0E11 0.0 -4.0E3
C7H14-1+O=>CH2CHO+C5H11-1    1.0E11 0.0 -1.05E3
C7H14-2+O=>CH3CHO+C5H10-1    1.0E11 0.0 -1.05E3
C7H14-3+O=>CH3CHO+C5H10-1    1.0E11 0.0 -1.05E3
C7H14-1=PC4H9+C3H5-A    3.17E21 -1.62 7.533E4
    REV/1.0E13 0.0E0 0.0E0/
!
!HENRY HCT
!
C7H14-2=C4H71-3+NC3H7    3.735E21 -1.74 7.571E4
    REV/1.0E13 0.0E0 0.0E0/
!
!
!
C7H14-3=C5H91-3+C2H5    5.947E21 -1.85 7.579E4
    REV/1.0E13 0.0E0 0.0E0/
C7H15O2-1=C7H15-1+O2    2.657E20 -1.67 3.54E4
    REV/4.52E12 0.0E0 0.0E0/
C7H15O2-3=C7H15-3+O2    1.357E23 -2.36 3.767E4
    REV/7.54E12 0.0E0 0.0E0/
C7H15O2-4=C7H15-4+O2    1.357E23 -2.36 3.767E4
    REV/7.54E12 0.0E0 0.0E0/
!
!
C7H15-1+C7H15O2-1=2C7H15O-1    7.0E12 0.0 -1.0E3
    REV/1.116E14 -2.3E-1 3.025E4/
!
!
!
C7H15-1+HO2=C7H15O-1+OH    7.0E12 0.0 -1.0E3
    REV/3.549E15 -5.7E-1 2.616E4/
!
C7H15-1+CH3O2=C7H15O-1+CH3O    7.0E12 0.0 -1.0E3
    REV/2.22E14 -2.8E-1 3.04E4/
!
!
C7H15O2-1=C7H14-1+HO2    4.308E36 -7.5 3.951E4
!REV/ 4.708E+28 -5.74 1.894E+04 /
C7H15O2-3=C7H14-2+HO2    4.308E36 -7.5 3.951E4
!REV/ 4.708E+28 -5.74 1.894E+04 /
C7H15O2-3=C7H14-3+HO2    4.308E36 -7.5 3.951E4
!REV/ 6.323E+28 -5.80 1.885E+04 /
C7H15O2-4=C7H14-3+HO2    2.009E39 -8.11 4.249E4
!REV/ 2.123E+10 -0.11 1.424E+04 /
C7H15O2-1=C7H14OOH1-3    2.5E10 0.0 2.045E4
!REV/ 2.653E+09 -0.11 8.240E+03 /
C7H15O2-1=C7H14OOH1-4    3.125E9 0.0 1.865E4
!REV/ 2.262E+10 -0.11 1.427E+04 /
C7H15O2-3=C7H14OOH3-5    2.5E10 0.0 2.045E4
!REV/ 2.518E+10 -0.52 7.310E+03 /
C7H15O2-4=C7H14OOH4-2    5.0E10 0.0 2.045E4
C7H15O2-1+CH3O2=>C7H15O-1+CH3O+O2    1.4E16 -1.61 1.86E3
2C7H15O2-1=>O2+2C7H15O-1    1.4E16 -1.61 1.86E3
!
!HCT HENRY
!
C7H15O-1=CH2O+C6H13-1    6.023E20 -2.18 2.483E4
    REV/1.0E11 0.0E0 1.19E4/
C7H14OOH1-3=>C7H14O1-3+OH    7.5E10 0.0 1.525E4
C7H14OOH1-4=>C7H14O1-4+OH    9.375E9 0.0 7.0E3
C7H14OOH4-2=>C7H14O2-4+OH    7.5E10 0.0 1.525E4
!
!HENRY HCT
!
C7H14OOH1-3=>OH+CH2O+C6H12-1    2.147E9 1.23 3.037E4
C7H14OOH3-5=>OH+C2H5CHO+C4H8-1    2.661E13 0.13 3.043E4
C7H14OOH4-2=>OH+NC3H7CHO+C3H6    6.186E13 0.09 3.084E4
C7H14OOH1-3=C4H7OOH1-4+NC3H7    1.609E12 0.54 2.774E4
    REV/2.2E3 2.48E0 6.13E3/
C7H14OOH1-4=>C5H10-1+C2H4+HO2    1.446E11 0.69 3.082E4
C7H14OOH1-4=C5H9OOH1-5+C2H5    1.721E12 0.51 2.79E4
    REV/2.2E3 2.48E0 6.13E3/
C7H14OOH1-3O2=C7H14OOH1-3+O2    1.367E23 -2.37 3.764E4
    REV/7.54E12 0.0E0 0.0E0/
!REV/ 2.881E+04 1.40 4.683E+04 /
C7H14OOH1-3O2=NC7KET13+OH    2.5E10 0.0 2.1E4
NC7KET13=>NC4H9CHO+CH2CHO+OH    1.0E16 0.0 3.9E4
C7H14O1-3+OH=>C6H12-1+HCO+H2O    2.5E12 0.0 0.0E0
C7H14O1-4+OH=>C5H10-1+CH2CHO+H2O    2.5E12 0.0 0.0E0
C7H14O2-4+OH=>CH3CO+C5H10-1+H2O    2.5E12 0.0 0.0E0
C7H14O1-3+OH=>C2H4+NC4H9CO+H2O    2.5E12 0.0 0.0E0
C7H14O1-4+OH=>C2H4+NC3H7COCH2+H2O    2.5E12 0.0 0.0E0
C7H14O2-4+OH=>C3H6+NC3H7CO+H2O    2.5E12 0.0 0.0E0
C7H14O1-3+HO2=>C6H12-1+HCO+H2O2    5.0E12 0.0 1.77E4
C7H14O1-4+HO2=>C5H10-1+CH2CHO+H2O2    5.0E12 0.0 1.77E4
C7H14O2-4+HO2=>CH3CO+C5H10-1+H2O2    5.0E12 0.0 1.77E4
C7H14O1-3+HO2=>C2H4+NC4H9CO+H2O2    5.0E12 0.0 1.77E4
C7H14O1-4+HO2=>C2H4+NC3H7COCH2+H2O2    5.0E12 0.0 1.77E4
C7H14O2-4+HO2=>C3H6+NC3H7CO+H2O2    5.0E12 0.0 1.77E4
NC5H11CHO+O2=NC5H11CO+HO2    2.0E13 0.5 4.22E4
    REV/1.0E7 0.0E0 4.0E4/
NC5H11CHO+OH=NC5H11CO+H2O    2.69E10 0.76 -3.4E2
    REV/1.74E10 7.6E-1 3.12E4/
NC5H11CHO+H=NC5H11CO+H2    4.0E13 0.0 4.2E3
    REV/1.8E13 0.0E0 2.4E4/
NC5H11CHO+O=NC5H11CO+OH    5.0E12 0.0 1.79E3
    REV/1.0E12 0.0E0 1.9E4/
NC5H11CHO+HO2=NC5H11CO+H2O2    2.8E12 0.0 1.36E4
    REV/1.0E12 0.0E0 1.0E4/
NC5H11CHO+CH3=NC5H11CO+CH4    1.7E12 0.0 8.44E3
    REV/1.5E13 0.0E0 2.8E4/
NC5H11CHO+CH3O=NC5H11CO+CH3OH    1.15E11 0.0 1.28E3
    REV/3.0E11 0.0E0 1.8E4/
NC5H11CHO+CH3O2=NC5H11CO+CH3O2H    1.0E12 0.0 9.5E3
    REV/2.5E10 0.0E0 1.0E4/
NC5H11CHO+OH=C5H10CHO-2+H2O    4.67E7 1.61 -3.5E1
    REV/1.752E6 1.85E0 2.388E4/
NC5H11CHO+OH=C5H10CHO-3+H2O    4.67E7 1.61 -3.5E1
    REV/1.752E6 1.85E0 2.388E4/
NC5H11CO=C5H11-1+CO    1.0E11 0.0 9.6E3
    REV/1.0E11 0.0E0 0.0E0/
NC5H11CHO+HO2=C5H10CHO-2+H2O2    1.475E4 2.6 1.391E4
    REV/3.285E3 2.51E0 6.362E3/
NC5H11CHO+HO2=C5H10CHO-3+H2O2    1.475E4 2.6 1.391E4
    REV/3.285E3 2.51E0 6.362E3/
NC5H11CHO+CH3O2=C5H10CHO-2+CH3O2H    1.99E12 0.0 1.705E4
    REV/1.821E12 -2.6E-1 8.784E3/
NC5H11CHO+CH3O2=C5H10CHO-3+CH3O2H    1.99E12 0.0 1.705E4
    REV/1.821E12 -2.6E-1 8.784E3/
C5H10CHO-2=C3H6+CH2CH2CHO    9.38E17 -1.31 3.197E4
    REV/1.0E11 0.0E0 7.8E3/
C5H10CHO-3=C4H8-1+CH2CHO    6.27E16 -1.43 2.599E4
    REV/1.0E11 0.0E0 7.8E3/
C5H10CHO-3=C4H7CHO1-4+CH3    2.373E14 -0.56 3.132E4
    REV/1.0E11 0.0E0 7.8E3/
C4H7CHO1-4+OH=CH3CHO+CH2CH2CHO    1.0E11 0.0 0.0E0
    REV/5.344E6 9.7E-1 1.926E4/
NC4H9COCH3+OH=NC4H9COCH2+H2O    5.1E11 0.0 1.192E3
    REV/6.786E13 -7.0E-1 2.768E4/
NC4H9COCH3+HO2=NC4H9COCH2+H2O2    2.38E4 2.55 1.469E4
    REV/1.88E7 1.52E0 9.712E3/
NC4H9COCH3+CH3O2=NC4H9COCH2+CH3O2H    3.01E12 0.0 1.758E4
    REV/9.77E15 -1.21E0 1.188E4/
NC4H9COCH2=PC4H9+CH2CO    1.554E18 -1.41 4.314E4
    REV/1.0E11 0.0E0 1.16E4/
C4H7OOH1-4=C4H7O1-4+OH    2.021E20 -1.53 4.704E4
    REV/2.0E13 0.0E0 0.0E0/
C5H9OOH1-5=C5H9O1-5+OH    1.594E20 -1.5 4.699E4
    REV/2.0E13 0.0E0 0.0E0/
C4H7O1-4=CH2O+C3H5-A    2.412E16 -1.14 7.55E3
    REV/1.0E11 0.0E0 1.19E4/
C5H9O1-4=CH3CHO+C3H5-A    7.715E20 -2.43 5.89E3
    REV/5.0E10 0.0E0 9.6E3/
C5H9O1-4=AC3H5CHO+CH3    1.112E17 -1.21 1.796E4
    REV/1.0E11 0.0E0 9.6E3/
C5H9O1-5=CH2O+C4H71-4    4.31E17 -1.33 1.794E4
    REV/1.0E11 0.0E0 9.6E3/
C4H7CHO1-1+OH=C4H7CO1-1+H2O    3.37E12 0.0 -6.16E2
    REV/5.203E12 3.0E-2 3.68E4/
C4H7CHO1-1+OH=C2H5CHO+CH2CHO    1.0E11 0.0 0.0E0
    REV/1.076E7 1.1E0 1.702E4/
C4H7CHO1-1+HO2=C4H7CO1-1+H2O2    1.0E12 0.0 1.192E4
    REV/9.165E12 -3.0E-1 1.787E4/
C4H7CHO1-1+CH3O2=C4H7CO1-1+CH3O2H    2.8E12 0.0 1.36E4
    REV/1.055E14 -4.7E-1 1.883E4/
C4H7CO1-1=C4H71-1+CO    8.51E20 -2.12 4.032E4
    REV/1.5E11 0.0E0 4.81E3/
NC3H7COC2H4P=NC3H7CO+C2H4    5.398E17 -1.45 2.604E4
    REV/2.5E11 0.0E0 7.8E3/
!
!
!!!!!!!!!!!!!!!!!!!!!!!!!!!!!!!!!!!!!!!!!!!!!!!!!!!!!!!!!!!!!!!!!!!!!!
!                                    !
!           HEXENE MODULE                    !
!                                    !
!!!!!!!!!!!!!!!!!!!!!!!!!!!!!!!!!!!!!!!!!!!!!!!!!!!!!!!!!!!!!!!!!!!!!!
!
O2+C6H12-1=>CH2O+NC4H9CHO    1.0E14 0.0 3.7E4
!
!!!!!!!!!!!!!!!!!!!!!!!!!!!!!!!
!                 !
!    CLASS 1  INITIATIONS     !
!                 !
!!!!!!!!!!!!!!!!!!!!!!!!!!!!!!!
!
!!
C6H12-1=2C3H6    4.0E12 0.0 5.8E4
!
!
!
!C6H12-1(=)NC3H7+C3H5-A  2.500E+16 0.00 7.100E+04
C6H111-3+H=C6H12-1    1.0E14 0.0 0.0E0
!!1988TS-887
PC4H9+C2H3=C6H12-1    1.0E13 0.0 0.0E0
C4H71-4+C2H5=C6H12-1    8.0E12 0.0 0.0E0
!
!
C6H111-3+H=C6H12-2    1.0E14 0.0 0.0E0
C6H112-4+H=C6H12-2    1.0E14 0.0 0.0E0
NC3H7+C3H5-T=C6H12-2    1.0E13 0.0 0.0E0
!
!
!
!ADDED... MM
!
!
C6H12-1+O2=C6H111-3+HO2    2.2E12 0.0 3.722E4
C6H12-1+O2=C6H111-4+HO2    2.0E13 0.0 4.964E4
C6H12-1+O2=C6H111-5+HO2    2.0E13 0.0 4.964E4
C6H12-1+O2=C6H111-6+HO2    3.0E13 0.0 5.229E4
!
C6H12-1+O=C6H111-3+OH    6.6E5 2.43 1.21E3
C6H12-1+O=C6H111-4+OH    5.51E5 2.45 2.83E3
C6H12-1+O=C6H111-5+OH    5.51E5 2.45 2.83E3
C6H12-1+O=C6H111-6+OH    9.8E5 2.43 4.75E3
!
!
C6H12-2+O2=C6H111-3+HO2    5.5E12 0.0 3.99E4
C6H12-2+O2=C6H112-4+HO2    2.2E12 0.0 3.722E4
C6H12-2+O2=C6H112-5+HO2    2.0E13 0.0 4.964E4
C6H12-2+O2=C6H112-6+HO2    3.0E13 0.0 5.229E4
!
C6H12-2+O=C6H111-3+OH    4.41E5 2.42 3.15E3
C6H12-2+O=C6H112-4+OH    6.6E5 2.43 1.21E3
C6H12-2+O=C6H112-5+OH    5.51E5 2.45 2.83E3
C6H12-2+O=C6H112-6+OH    9.8E5 2.43 4.75E3
!
!
!!!!!!!!!!!!!!!!!!!!!!!!!!!!!!!!!!!!!
!                   !
!    CLASS 3  BETA-DECOMPOSITION    !
!                   !
!!!!!!!!!!!!!!!!!!!!!!!!!!!!!!!!!!!!!
!
!
C2H5+C4H6=C6H111-3    8.5E10 0.0 8.3E3
!
CH3+C5H81-4=C6H111-4    1.0E11 0.0 7.8E3
!
!MM 1996B-R/M-R829-847   !!!! *2 -1000
C3H5-A+C3H6=C6H111-5    4.0E11 0.0 1.69E4
!
C4H71-4+C2H4=C6H111-6    1.0E11 0.0 8.2E3
!
!
!MM 1988PER/RIC621
CH3+C5H81-3=C6H112-4    6.0E10 0.0 7.5E3
!
C3H5-T+C3H6=C6H112-5    6.3E11 0.0 3.1E3
!
!MM 2004S-E/REY426-444
C4H71-3+C2H4=C6H112-6    4.0E11 0.0 1.305E4
!
!
C4H71-1+C2H4=C6H113-1    6.3E11 0.0 3.1E3
!
!
!
!
!!!!!!!!!!!!!!!!!!!!!!!!!!!!!!!!!!!!!
!                   !
!    CLASS 5  ISOMERIZATION     !
!                   !
!!!!!!!!!!!!!!!!!!!!!!!!!!!!!!!!!!!!!
!
C6H111-6=C6H111-4    3.8E10 0.67 3.6E4
C6H111-6=C6H111-5    3.56E10 0.88 3.73E4
!
!
C6H112-6=C6H112-4    3.8E10 0.67 2.84E4
C6H112-6=C6H112-5    3.56E10 0.88 3.73E4
!
!
C6H113-1=C6H112-4    3.56E10 0.88 2.96E4
C6H112-4+O2=C6H112O2-4    2.0E12 0.0 0.0E0
C6H112-5+O2=C6H112O2-5    7.54E12 0.0 0.0E0
!
!
C6H112O2-4=>C6H101-3+HO2    5.04E38 -8.11 4.05E4
C6H112O2-5=>C6H102-4+HO2    1.04E38 -8.11 3.75E4
!
!
!
C6H112O2-4=C6H102OOH4-5    2.0E11 0.0 2.645E4
!! -2000
C6H112O2-5=C6H102OOH5-4    2.0E11 0.0 2.445E4
!C6H112O2-1=)EDHF + OH                .200E+11    .000   19100.0 !!!DIFFERENT CLASS
!
!
C6H102OOH4-5=>ETES1+OH    6.0E11 0.0 2.2E4
!MM
C6H102OOH5-4=>ETES1+OH    6.0E11 0.0 2.2E4
!
!
HO2+C6H102-4=C6H102OOH4-5    3.8E11 0.0 8.8E3
HO2+C6H102-4=C6H102OOH5-4    3.8E11 0.0 7.8E3
!
!
!
!
!
!!!!!!!!!!!!!!!!!!!!!!!!!!!!!!!!!!!!!!
!                    !
! CLASS 20B HO2 + OLEFIN FORMATION   ! -A) HO2 -DDITION ON HEXENES
!                    !
!!!!!!!!!!!!!!!!!!!!!!!!!!!!!!!!!!!!!!
!
!
C6H12-1+HO2=C6H12OOH1-2    1.0E12 0.0 1.37E4
!
!
C6H12OH-2=>NC3H7CHO+C2H5    1.5E13 0.0 3.0E4
C6H12OH-2=>NC4H9CHO+CH3    1.5E13 0.0 3.0E4
!
!!!!!!!!!!!!!!!!!!!!!!!!!!!!!!!!!!!!!!!!!!!!!!!!!!!!!!!!!!!!!!!!!!!!!!!!!!!!!!!!!!!!
!
!
!
!ACTIVATION OF THE HO2 --) OH
!
!
!
!
!
!
!
!
!ABSTRACTION ON ETEROCYCLES
!
O2+ETES1=>HO2+C2H3COCH3+C2H3    2.045E7 2.0 4.072249E4
H+ETES1=>H2+C2H3COCH3+C2H3    2.574E7 2.0 3.95057E3
OH+ETES1=>H2O+C2H3COCH3+C2H3    4.793E6 2.0 -2.25983E3
O+ETES1=>OH+C2H3COCH3+C2H3    1.624E7 2.0 2.57954E3
HO2+ETES1=>H2O2+C2H3COCH3+C2H3    6.465E5 2.0 1.188773E4
HCO+ETES1=>CH2O+C2H3COCH3+C2H3    1.516E6 2.0 1.236044E4
CH3+ETES1=>CH4+C2H3COCH3+C2H3    4.684E5 2.0 4.87129E3
C2H5+ETES1=>C2H6+C2H3COCH3+C2H3    2.758E5 2.0 7.65807E3
CH3O+ETES1=>CH3OH+C2H3COCH3+C2H3    5.136E5 2.0 1.58356E3
CH3O2+ETES1=>CH3O2H+C2H3COCH3+C2H3    9.133E5 2.0 1.236044E4
!
!ADDITIONAL ABSTRACTION
!
O2+C5H81-4=>HO2+C3H5-A+C2H2    5.111E6 2.0 4.072249E4
H+C5H81-4=>H2+C3H5-A+C2H2    6.435E6 2.0 3.95057E3
OH+C5H81-4=>H2O+C3H5-A+C2H2    1.198E6 2.0 -2.25983E3
O+C5H81-4=>OH+C3H5-A+C2H2    4.06E6 2.0 2.57954E3
HO2+C5H81-4=>H2O2+C3H5-A+C2H2    1.616E5 2.0 1.188773E4
HCO+C5H81-4=>CH2O+C3H5-A+C2H2    3.789E5 2.0 1.236044E4
CH3+C5H81-4=>CH4+C3H5-A+C2H2    1.171E5 2.0 4.87129E3
C2H5+C5H81-4=>C2H6+C3H5-A+C2H2    6.895E4 2.0 7.65807E3
CH3O+C5H81-4=>CH3OH+C3H5-A+C2H2    1.284E5 2.0 1.58356E3
CH3O2+C5H81-4=>CH3O2H+C3H5-A+C2H2    2.283E5 2.0 1.236044E4
C2H3+C5H81-4=>C2H4+C3H5-A+C2H2    2.035E5 2.0 4.87129E3
!
!!ADDITION ON DIOLEFIN
!
C6H101-3+H=C6H111-3    2.5E11 0.5 2.62E3
C6H101-3+H=C6H111-4    2.5E11 0.5 2.62E3
C6H101-3+H=C6H113-1    4.25E11 0.5 1.23E3
C6H101-3+H=C6H112-4    2.5E11 0.5 2.62E3
!
C6H101-4+H=C6H111-4    2.5E11 0.5 2.62E3
C6H101-4+H=C6H111-5    2.5E11 0.5 2.62E3
C6H101-4+H=C6H112-5    4.25E11 0.5 1.23E3
C6H101-4+H=C6H112-6    2.5E11 0.5 2.62E3
!
C6H101-5+H=C6H111-5    4.25E11 0.5 1.23E3
C6H101-5+H=C6H111-6    2.5E11 0.5 2.62E3
!
!
C6H101-3+O=>C5H91-3+HCO    2.0E11 0.0 -1.05E3
!
!
C6H101-3+OH=>C5H91-3+CH2O    1.0E12 0.0 0.0E0
!
!
!
C6H101-3+OH=>C2H3+C4H6+H2O    2.764E4 2.64 -1.919E3
C6H101-4+OH=>C2H3+C4H6+H2O    2.764E4 2.64 -1.919E3
C6H101-5+OH=>C2H3+C4H6+H2O    2.764E4 2.64 -1.919E3
!
!
C6H101-3+HO2=>C2H3+C4H6+H2O2    4.82E3 2.55 1.053E4
C6H101-4+HO2=>C2H3+C4H6+H2O2    4.82E3 2.55 1.053E4
C6H101-5+HO2=>C2H3+C4H6+H2O2    4.82E3 2.55 1.053E4
!
C6H101-3+H=>C2H3+C4H6+H2    3.376E5 2.36 2.07E2
C6H101-4+H=>C2H3+C4H6+H2    3.376E5 2.36 2.07E2
C6H101-5+H=>C2H3+C4H6+H2    3.376E5 2.36 2.07E2
!
!
!
!
!
!
!!!!!!C 8-C16 N-ALKANE MECHANISM FROM LLNL WITH ONLY HIGH TEMPERATURE RXNS (CLASSES 1-9)!!!!!!!!!!!
!
!
!
!
!     UNIMOLECULAR REACTIONS OF ALKANES
!
!  CLASS 1
!
!     DECOMPOSITION AND RECOMBINATION REACTIONS
!
!
C12H25-1+H=NC12H26    1.0E14 0.0 0.0E0
C12H25-2+H=NC12H26    1.0E14 0.0 0.0E0
C12H25-3+H=NC12H26    1.0E14 0.0 0.0E0
C12H25-4+H=NC12H26    1.0E14 0.0 0.0E0
C12H25-5+H=NC12H26    1.0E14 0.0 0.0E0
C12H25-6+H=NC12H26    1.0E14 0.0 0.0E0
!
C11H23-1+CH3=NC12H26    1.0E13 0.0 0.0E0
C10H21-1+C2H5=NC12H26    8.0E12 0.0 0.0E0
C9H19-1+NC3H7=NC12H26    8.0E12 0.0 0.0E0
C8H17-1+PC4H9=NC12H26    8.0E12 0.0 0.0E0
C7H15-1+C5H11-1=NC12H26    8.0E12 0.0 0.0E0
2C6H13-1=NC12H26    8.0E12 0.0 0.0E0
!
C10H21-1+H=NC10H22    1.0E14 0.0 0.0E0
C10H21-2+H=NC10H22    1.0E14 0.0 0.0E0
C10H21-3+H=NC10H22    1.0E14 0.0 0.0E0
C10H21-4+H=NC10H22    1.0E14 0.0 0.0E0
C10H21-5+H=NC10H22    1.0E14 0.0 0.0E0
!
C9H19-1+CH3=NC10H22    1.0E13 0.0 0.0E0
C8H17-1+C2H5=NC10H22    8.0E12 0.0 0.0E0
C7H15-1+NC3H7=NC10H22    8.0E12 0.0 0.0E0
C6H13-1+PC4H9=NC10H22    8.0E12 0.0 0.0E0
2C5H11-1=NC10H22    8.0E12 0.0 0.0E0
!
!
!     CLASS 2
!
!     H ATOM ABSTRACTION
!
!
!
NC12H26+H=C12H25-1+H2    1.33E6 2.54 6.756E3
NC12H26+H=C12H25-2+H2    2.6E6 2.4 4.471E3
NC12H26+H=C12H25-3+H2    2.6E6 2.4 4.471E3
NC12H26+H=C12H25-4+H2    2.6E6 2.4 4.471E3
NC12H26+H=C12H25-5+H2    2.6E6 2.4 4.471E3
NC12H26+H=C12H25-6+H2    2.6E6 2.4 4.471E3
!
NC12H26+OH=C12H25-1+H2O    1.056E10 0.97 1.59E3
NC12H26+OH=C12H25-2+H2O    9.4E7 1.61 -3.5E1
NC12H26+OH=C12H25-3+H2O    9.4E7 1.61 -3.5E1
NC12H26+OH=C12H25-4+H2O    9.4E7 1.61 -3.5E1
NC12H26+OH=C12H25-5+H2O    9.4E7 1.61 -3.5E1
NC12H26+OH=C12H25-6+H2O    9.4E7 1.61 -3.5E1
!
NC12H26+O=C12H25-1+OH    1.96E6 2.43 4.75E3
NC12H26+O=C12H25-2+OH    1.1E6 2.45 2.83E3
NC12H26+O=C12H25-3+OH    1.1E6 2.45 2.83E3
NC12H26+O=C12H25-4+OH    1.1E6 2.45 2.83E3
NC12H26+O=C12H25-5+OH    1.1E6 2.45 2.83E3
NC12H26+O=C12H25-6+OH    1.1E6 2.45 2.83E3
!
NC12H26+HO2=C12H25-1+H2O2    4.08E1 3.59 1.716E4
NC12H26+HO2=C12H25-2+H2O2    1.264E2 3.37 1.372E4
NC12H26+HO2=C12H25-3+H2O2    1.264E2 3.37 1.372E4
NC12H26+HO2=C12H25-4+H2O2    1.264E2 3.37 1.372E4
NC12H26+HO2=C12H25-5+H2O2    1.264E2 3.37 1.372E4
NC12H26+HO2=C12H25-6+H2O2    1.264E2 3.37 1.372E4
!
NC12H26+CH3=C12H25-1+CH4    9.06E-1 3.65 7.154E3
NC12H26+CH3=C12H25-2+CH4    3.02E0 3.46 5.481E3
NC12H26+CH3=C12H25-3+CH4    3.02E0 3.46 5.481E3
NC12H26+CH3=C12H25-4+CH4    3.02E0 3.46 5.481E3
NC12H26+CH3=C12H25-5+CH4    3.02E0 3.46 5.481E3
NC12H26+CH3=C12H25-6+CH4    3.02E0 3.46 5.481E3
!
NC12H26+O2=C12H25-1+HO2    6.0E13 0.0 5.229E4
NC12H26+O2=C12H25-2+HO2    4.0E13 0.0 4.964E4
NC12H26+O2=C12H25-3+HO2    4.0E13 0.0 4.964E4
NC12H26+O2=C12H25-4+HO2    4.0E13 0.0 4.964E4
NC12H26+O2=C12H25-5+HO2    4.0E13 0.0 4.964E4
NC12H26+O2=C12H25-6+HO2    4.0E13 0.0 4.964E4
!
NC12H26+C2H3=C12H25-1+C2H4    1.0E12 0.0 1.8E4
NC12H26+C2H3=C12H25-2+C2H4    8.0E11 0.0 1.68E4
NC12H26+C2H3=C12H25-3+C2H4    8.0E11 0.0 1.68E4
NC12H26+C2H3=C12H25-4+C2H4    8.0E11 0.0 1.68E4
NC12H26+C2H3=C12H25-5+C2H4    8.0E11 0.0 1.68E4
NC12H26+C2H3=C12H25-6+C2H4    8.0E11 0.0 1.68E4
!
NC12H26+C2H5=C12H25-1+C2H6    1.0E11 0.0 1.34E4
NC12H26+C2H5=C12H25-2+C2H6    1.0E11 0.0 1.04E4
NC12H26+C2H5=C12H25-3+C2H6    1.0E11 0.0 1.04E4
NC12H26+C2H5=C12H25-4+C2H6    1.0E11 0.0 1.04E4
NC12H26+C2H5=C12H25-5+C2H6    1.0E11 0.0 1.04E4
NC12H26+C2H5=C12H25-6+C2H6    1.0E11 0.0 1.04E4
!
!
NC12H26+CH3O=C12H25-1+CH3OH    4.34E11 0.0 6.458E3
NC12H26+CH3O=C12H25-2+CH3OH    2.9E11 0.0 4.571E3
NC12H26+CH3O=C12H25-3+CH3OH    2.9E11 0.0 4.571E3
NC12H26+CH3O=C12H25-4+CH3OH    2.9E11 0.0 4.571E3
NC12H26+CH3O=C12H25-5+CH3OH    2.9E11 0.0 4.571E3
NC12H26+CH3O=C12H25-6+CH3OH    2.9E11 0.0 4.571E3
!
!
NC12H26+CH3O2=C12H25-1+CH3O2H    1.386E0 3.97 1.828E4
NC12H26+CH3O2=C12H25-2+CH3O2H    2.037E1 3.58 1.481E4
NC12H26+CH3O2=C12H25-3+CH3O2H    2.037E1 3.58 1.481E4
NC12H26+CH3O2=C12H25-4+CH3O2H    2.037E1 3.58 1.481E4
NC12H26+CH3O2=C12H25-5+CH3O2H    2.037E1 3.58 1.481E4
NC12H26+CH3O2=C12H25-6+CH3O2H    2.037E1 3.58 1.481E4
!
!
!
NC12H26+O2CHO=C12H25-1+HO2CHO    1.68E13 0.0 2.044E4
NC12H26+O2CHO=C12H25-2+HO2CHO    1.12E13 0.0 1.769E4
NC12H26+O2CHO=C12H25-3+HO2CHO    1.12E13 0.0 1.769E4
NC12H26+O2CHO=C12H25-4+HO2CHO    1.12E13 0.0 1.769E4
NC12H26+O2CHO=C12H25-5+HO2CHO    1.12E13 0.0 1.769E4
NC12H26+O2CHO=C12H25-6+HO2CHO    1.12E13 0.0 1.769E4
!
!
NC10H22+H=C10H21-1+H2    1.33E6 2.54 6.756E3
NC10H22+H=C10H21-2+H2    2.6E6 2.4 4.471E3
NC10H22+H=C10H21-3+H2    2.6E6 2.4 4.471E3
NC10H22+H=C10H21-4+H2    2.6E6 2.4 4.471E3
NC10H22+H=C10H21-5+H2    2.6E6 2.4 4.471E3
!
NC10H22+OH=C10H21-1+H2O    1.056E10 0.97 1.59E3
NC10H22+OH=C10H21-2+H2O    9.4E7 1.61 -3.5E1
NC10H22+OH=C10H21-3+H2O    9.4E7 1.61 -3.5E1
NC10H22+OH=C10H21-4+H2O    9.4E7 1.61 -3.5E1
NC10H22+OH=C10H21-5+H2O    9.4E7 1.61 -3.5E1
!
NC10H22+O=C10H21-1+OH    1.96E6 2.43 4.75E3
NC10H22+O=C10H21-2+OH    1.1E6 2.45 2.83E3
NC10H22+O=C10H21-3+OH    1.1E6 2.45 2.83E3
NC10H22+O=C10H21-4+OH    1.1E6 2.45 2.83E3
NC10H22+O=C10H21-5+OH    1.1E6 2.45 2.83E3
!
NC10H22+HO2=C10H21-1+H2O2    4.08E1 3.59 1.716E4
NC10H22+HO2=C10H21-2+H2O2    1.264E2 3.37 1.372E4
NC10H22+HO2=C10H21-3+H2O2    1.264E2 3.37 1.372E4
NC10H22+HO2=C10H21-4+H2O2    1.264E2 3.37 1.372E4
NC10H22+HO2=C10H21-5+H2O2    1.264E2 3.37 1.372E4
!
NC10H22+CH3=C10H21-1+CH4    9.06E-1 3.65 7.154E3
NC10H22+CH3=C10H21-2+CH4    3.02E0 3.46 5.481E3
NC10H22+CH3=C10H21-3+CH4    3.02E0 3.46 5.481E3
NC10H22+CH3=C10H21-4+CH4    3.02E0 3.46 5.481E3
NC10H22+CH3=C10H21-5+CH4    3.02E0 3.46 5.481E3
!
NC10H22+O2=C10H21-1+HO2    6.0E13 0.0 5.229E4
NC10H22+O2=C10H21-2+HO2    4.0E13 0.0 4.964E4
NC10H22+O2=C10H21-3+HO2    4.0E13 0.0 4.964E4
NC10H22+O2=C10H21-4+HO2    4.0E13 0.0 4.964E4
NC10H22+O2=C10H21-5+HO2    4.0E13 0.0 4.964E4
!
NC10H22+C2H3=C10H21-1+C2H4    1.0E12 0.0 1.8E4
NC10H22+C2H3=C10H21-2+C2H4    8.0E11 0.0 1.68E4
NC10H22+C2H3=C10H21-3+C2H4    8.0E11 0.0 1.68E4
NC10H22+C2H3=C10H21-4+C2H4    8.0E11 0.0 1.68E4
NC10H22+C2H3=C10H21-5+C2H4    8.0E11 0.0 1.68E4
!
NC10H22+C2H5=C10H21-1+C2H6    1.0E11 0.0 1.34E4
NC10H22+C2H5=C10H21-2+C2H6    1.0E11 0.0 1.04E4
NC10H22+C2H5=C10H21-3+C2H6    1.0E11 0.0 1.04E4
NC10H22+C2H5=C10H21-4+C2H6    1.0E11 0.0 1.04E4
NC10H22+C2H5=C10H21-5+C2H6    1.0E11 0.0 1.04E4
!
NC10H22+CH3O=C10H21-1+CH3OH    4.34E11 0.0 6.458E3
NC10H22+CH3O=C10H21-2+CH3OH    2.9E11 0.0 4.571E3
NC10H22+CH3O=C10H21-3+CH3OH    2.9E11 0.0 4.571E3
NC10H22+CH3O=C10H21-4+CH3OH    2.9E11 0.0 4.571E3
NC10H22+CH3O=C10H21-5+CH3OH    2.9E11 0.0 4.571E3
!
!
NC10H22+CH3O2=C10H21-1+CH3O2H    1.386E0 3.97 1.828E4
NC10H22+CH3O2=C10H21-2+CH3O2H    2.037E1 3.58 1.481E4
NC10H22+CH3O2=C10H21-3+CH3O2H    2.037E1 3.58 1.481E4
NC10H22+CH3O2=C10H21-4+CH3O2H    2.037E1 3.58 1.481E4
NC10H22+CH3O2=C10H21-5+CH3O2H    2.037E1 3.58 1.481E4
!
!
!
NC10H22+O2CHO=C10H21-1+HO2CHO    1.68E13 0.0 2.044E4
NC10H22+O2CHO=C10H21-2+HO2CHO    1.12E13 0.0 1.769E4
NC10H22+O2CHO=C10H21-3+HO2CHO    1.12E13 0.0 1.769E4
NC10H22+O2CHO=C10H21-4+HO2CHO    1.12E13 0.0 1.769E4
NC10H22+O2CHO=C10H21-5+HO2CHO    1.12E13 0.0 1.769E4
!
!
!      CLASS 3
!
!     ALKYL DECOMPOSITION
!
!
!
C12H25-1=C2H4+C10H21-1    9.12E11 0.31 2.7238E4
H+C12H24-1=C12H25-1    2.5E11 0.51 2.62E3
!
C12H25-2=C3H6+C9H19-1    6.0E11 0.5 2.765E4
H+C12H24-1=C12H25-2    4.24E11 0.51 1.23E3
H+C12H24-2=C12H25-2    2.5E11 0.51 2.62E3
!
C12H25-3=C4H8-1+C8H17-1    6.0E11 0.5 2.765E4
C12H25-3=CH3+C11H22-1    9.55E9 1.08 2.9388E4
H+C12H24-2=C12H25-3    2.5E11 0.51 2.62E3
H+C12H24-3=C12H25-3    2.5E11 0.51 2.62E3
!
C12H25-4=C5H10-1+C7H15-1    6.0E11 0.5 2.765E4
C12H25-4=C2H5+C10H20-1    6.0E11 0.5 2.765E4
H+C12H24-3=C12H25-4    2.5E11 0.51 2.62E3
H+C12H24-4=C12H25-4    2.5E11 0.51 2.62E3
!
C12H25-5=C6H12-1+C6H13-1    6.0E11 0.5 2.765E4
C12H25-5=NC3H7+C9H18-1    6.0E11 0.5 2.765E4
H+C12H24-4=C12H25-5    2.5E11 0.51 2.62E3
H+C12H24-5=C12H25-5    2.5E11 0.51 2.62E3
!
C12H25-6=C7H14-1+C5H11-1    6.0E11 0.5 2.765E4
C12H25-6=PC4H9+C8H16-1    6.0E11 0.5 2.765E4
H+C12H24-5=C12H25-6    2.5E11 0.51 2.62E3
!
!
C11H23-1=C2H4+C9H19-1    9.12E11 0.31 2.7238E4
H+C11H22-1=C11H23-1    2.5E11 0.51 2.62E3
!
C11H23-4=C5H10-1+C6H13-1    6.0E11 0.5 2.765E4
C11H23-4=C2H5+C9H18-1    6.0E11 0.5 2.765E4
!
C11H23-5=C6H12-1+C5H11-1    6.0E11 0.5 2.765E4
C11H23-5=NC3H7+C8H16-1    6.0E11 0.5 2.765E4
!
!
C10H21-1=C2H4+C8H17-1    9.12E11 0.31 2.7238E4
H+C10H20-1=C10H21-1    2.5E11 0.51 2.62E3
!
C10H21-2=C3H6+C7H15-1    6.0E11 0.5 2.765E4
H+C10H20-1=C10H21-2    4.24E11 0.51 1.23E3
!
C10H21-3=C4H8-1+C6H13-1    6.0E11 0.5 2.765E4
C10H21-3=CH3+C9H18-1    9.55E9 1.08 2.9388E4
!
C10H21-4=C5H10-1+C5H11-1    6.0E11 0.5 2.765E4
C10H21-4=C2H5+C8H16-1    6.0E11 0.5 2.765E4
H+C10H20-4=C10H21-4    2.5E11 0.51 2.62E3
!
C10H21-5=C6H12-1+PC4H9    6.0E11 0.5 2.765E4
C10H21-5=NC3H7+C7H14-1    6.0E11 0.5 2.765E4
H+C10H20-4=C10H21-5    2.5E11 0.51 2.62E3
H+C10H20-5=C10H21-5    2.5E11 0.51 2.62E3
!
!
C9H19-1=C2H4+C7H15-1    9.12E11 0.31 2.7238E4
H+C9H18-1=C9H19-1    2.5E11 0.51 2.62E3
!
C9H19-2=C3H6+C6H13-1    6.0E11 0.5 2.765E4
H+C9H18-1=C9H19-2    4.24E11 0.51 1.23E3
!
C9H19-4=C5H10-1+PC4H9    6.0E11 0.5 2.765E4
C9H19-4=C2H5+C7H14-1    6.0E11 0.5 2.765E4
H+C9H18-3=C9H19-4    2.5E11 0.51 2.62E3
H+C9H18-4=C9H19-4    2.5E11 0.51 2.62E3
!
C9H19-5=C6H12-1+NC3H7    6.0E11 0.5 2.765E4
H+C9H18-4=C9H19-5    2.5E11 0.51 2.62E3
!
!
C8H17-1=C2H4+C6H13-1    9.12E11 0.31 2.7238E4
H+C8H16-1=C8H17-1    2.5E11 0.51 2.62E3
!
C8H17-3=C4H8-1+PC4H9    6.0E11 0.5 2.765E4
C8H17-3=CH3+C7H14-1    9.55E9 1.08 2.9388E4
H+C8H16-3=C8H17-3    2.5E11 0.51 2.62E3
!
C8H17-4=C5H10-1+NC3H7    6.0E11 0.5 2.765E4
C8H17-4=C2H5+C6H12-1    6.0E11 0.5 2.765E4
H+C8H16-3=C8H17-4    2.5E11 0.51 2.62E3
H+C8H16-4=C8H17-4    2.5E11 0.51 2.62E3
!
!    CLASS 4    ALKYL RADICAL ISOMERIZATION
!
!    INCLUDE 3, 4, 5, AND 6 MEMBERED TRANSITION STATE RINGS
!
!
!TSANG 2007 1-C6H13=3-C6H13 5M P-S
C12H25-1=C12H25-4    6.92E0 3.2 1.6558E4
!TSANG 2007 1-C6H13=2-C6H13  6M P-S
C12H25-1=C12H25-5    1.82E2 2.55 1.096E4
!TSANG 2009 1-OCTYL=3-OCTYL 7M P-S
C12H25-1=C12H25-6    2.96E0 3.08 1.102E4
!TSANG 2009 2-OCTYL=4OCTYL, 5M S-S
C12H25-2=C12H25-5    1.42E0 3.32 1.614E4
!TSANG 2009 2-OCTYL=3OCTYL, 6M S-S
C12H25-2=C12H25-6    1.86E0 3.27 1.32E4
    DUP
!ESTIMATED, 7M S-S
C12H25-2=C12H25-6    6.0E-1 3.35 1.4E4
    DUP
!TSANG 2009 2-OCTYL=4OCTYL, 5M S-S
C12H25-3=C12H25-6    1.42E0 3.32 1.614E4
    DUP
!TSANG 2009 2-OCTYL=3OCTYL, 6M S-S
C12H25-3=C12H25-6    1.86E0 3.27 1.32E4
    DUP
!ESTIMATED, 7M S-S
C12H25-3=C12H25-5    6.0E-1 3.35 1.4E4
!TSANG 2009 2-OCTYL=4OCTYL, 5M S-S
C12H25-4=C12H25-6    1.42E0 3.32 1.614E4
!TSANG 2009 2-OCTYL=3OCTYL, 6M S-S
C12H25-4=C12H25-5    1.86E0 3.27 1.32E4
!
!TSANG 2007 1-C6H13=3-C6H13 5M P-S
C11H23-1=C11H23-4    6.92E0 3.2 1.6558E4
!TSANG 2007 1-C6H13=2-C6H13  6M P-S
C11H23-1=C11H23-5    1.82E2 2.55 1.096E4
!TSANG 2009 2-OCTYL=4OCTYL, 5M S-S
C11H23-4=C11H23-5    1.42E0 3.32 1.614E4
!
!TSANG 2007 1-C6H13=3-C6H13 5M P-S
C10H21-1=C10H21-4    6.92E0 3.2 1.6558E4
!TSANG 2007 1-C6H13=2-C6H13  6M P-S
C10H21-1=C10H21-5    1.82E2 2.55 1.096E4
    DUP
!TSANG 2009 1-OCTYL=3-OCTYL 7M P-S
C10H21-1=C10H21-5    2.96E0 3.08 1.102E4
    DUP
!TSANG 2009 2-OCTYL=4OCTYL, 5M S-S
C10H21-2=C10H21-5    1.42E0 3.32 1.614E4
    DUP
!TSANG 2009 2-OCTYL=3OCTYL, 6M S-S
C10H21-2=C10H21-5    1.86E0 3.27 1.32E4
    DUP
!ESTIMATED, 7M S-S
C10H21-2=C10H21-4    6.0E-1 3.35 1.4E4
!TSANG 2009 2-OCTYL=4OCTYL, 5M S-S
C10H21-3=C10H21-5    1.42E0 3.32 1.614E4
!TSANG 2009 2-OCTYL=3OCTYL, 6M S-S
C10H21-3=C10H21-4    1.86E0 3.27 1.32E4
!
!
!TSANG 2007 1-C6H13=3-C6H13 5M P-S
C9H19-1=C9H19-4    6.92E0 3.2 1.6558E4
    DUP
!TSANG 2007 1-C6H13=2-C6H13  6M P-S
C9H19-1=C9H19-5    1.82E2 2.55 1.096E4
!TSANG 2009 1-OCTYL=3-OCTYL 7M P-S
C9H19-1=C9H19-4    2.96E0 3.08 1.102E4
    DUP
!TSANG 2009 2-OCTYL=4OCTYL, 5M S-S
C9H19-2=C9H19-5    1.42E0 3.32 1.614E4
!TSANG 2009 2-OCTYL=3OCTYL, 6M S-S
C9H19-2=C9H19-4    1.86E0 3.27 1.32E4
!
!TSANG 2009 1-OCTYL=3-OCTYL 7M P-S
C8H17-1=C8H17-3    2.96E0 3.08 1.102E4
!TSANG 2007 1-C6H13=3-C6H13 5M P-S
C8H17-1=C8H17-4    6.92E0 3.2 1.6558E4
    DUP
!TSANG 2007 1-C6H13=2-C6H13  6M P-S
C8H17-1=C8H17-4    1.82E2 2.55 1.096E4
    DUP
!
!
!    CLASS 5    H ATOM ABSTRACTION FROM OLEFINS
!
!!
!!
C12H24-1+HO2=C12H23+H2O2    7.58E2 3.37 1.372E4
C12H24-2+HO2=C12H23+H2O2    7.58E2 3.37 1.372E4
C12H24-3+HO2=C12H23+H2O2    7.58E2 3.37 1.372E4
C12H24-4+HO2=C12H23+H2O2    7.58E2 3.37 1.372E4
C12H24-5+HO2=C12H23+H2O2    7.58E2 3.37 1.372E4
!
C12H24-1+OH=C12H23+H2O    5.62E7 1.61 -3.5E1
C12H24-2+OH=C12H23+H2O    5.62E7 1.61 -3.5E1
C12H24-3+OH=C12H23+H2O    5.62E7 1.61 -3.5E1
C12H24-4+OH=C12H23+H2O    5.62E7 1.61 -3.5E1
C12H24-5+OH=C12H23+H2O    5.62E7 1.61 -3.5E1
!
C12H24-1+H=C12H23+H2    1.56E7 2.4 4.471E3
C12H24-2+H=C12H23+H2    1.56E7 2.4 4.471E3
C12H24-3+H=C12H23+H2    1.56E7 2.4 4.471E3
C12H24-4+H=C12H23+H2    1.56E7 2.4 4.471E3
C12H24-5+H=C12H23+H2    1.56E7 2.4 4.471E3
!
C12H24-1+CH3=C12H23+CH4    1.81E1 3.46 5.481E3
C12H24-2+CH3=C12H23+CH4    1.81E1 3.46 5.481E3
C12H24-3+CH3=C12H23+CH4    1.81E1 3.46 5.481E3
C12H24-4+CH3=C12H23+CH4    1.81E1 3.46 5.481E3
C12H24-5+CH3=C12H23+CH4    1.81E1 3.46 5.481E3
!
C12H24-1+O=C12H23+OH    6.62E6 2.45 2.83E3
C12H24-2+O=C12H23+OH    6.62E6 2.45 2.83E3
C12H24-3+O=C12H23+OH    6.62E6 2.45 2.83E3
C12H24-4+O=C12H23+OH    6.62E6 2.45 2.83E3
C12H24-5+O=C12H23+OH    6.62E6 2.45 2.83E3
!
!!
C11H22-1+HO2=C11H21+H2O2    6.95E2 3.37 1.372E4
!
C11H22-1+OH=C11H21+H2O    5.15E8 1.61 -3.5E1
!
C11H22-1+H=C11H21+H2    1.43E7 2.4 4.471E3
!
C11H22-1+CH3=C11H21+CH4    1.66E1 3.46 5.481E3
!
C11H22-1+O=C11H21+OH    6.07E6 2.45 2.83E3
!
!!
C10H20-1+HO2=C10H19+H2O2    6.32E2 3.37 1.372E4
C10H20-4+HO2=C10H19+H2O2    6.32E2 3.37 1.372E4
C10H20-5+HO2=C10H19+H2O2    6.32E2 3.37 1.372E4
!
C10H20-1+OH=C10H19+H2O    4.68E8 1.61 -3.5E1
C10H20-4+OH=C10H19+H2O    4.68E8 1.61 -3.5E1
C10H20-5+OH=C10H19+H2O    4.68E8 1.61 -3.5E1
!
C10H20-1+H=C10H19+H2    1.3E7 2.4 4.471E3
C10H20-4+H=C10H19+H2    1.3E7 2.4 4.471E3
C10H20-5+H=C10H19+H2    1.3E7 2.4 4.471E3
!
C10H20-1+CH3=C10H19+CH4    1.51E1 3.46 5.481E3
C10H20-4+CH3=C10H19+CH4    1.51E1 3.46 5.481E3
C10H20-5+CH3=C10H19+CH4    1.51E1 3.46 5.481E3
!
C10H20-1+O=C10H19+OH    5.52E6 2.45 2.83E3
C10H20-4+O=C10H19+OH    5.52E6 2.45 2.83E3
C10H20-5+O=C10H19+OH    5.52E6 2.45 2.83E3
!
!
C9H18-1+HO2=C9H17+H2O2    5.59E2 3.37 1.372E4
C9H18-3+HO2=C9H17+H2O2    5.59E2 3.37 1.372E4
C9H18-4+HO2=C9H17+H2O2    5.59E2 3.37 1.372E4
!
C9H18-1+OH=C9H17+H2O    4.21E8 1.61 -3.5E1
C9H18-3+OH=C9H17+H2O    4.21E8 1.61 -3.5E1
C9H18-4+OH=C9H17+H2O    4.21E8 1.61 -3.5E1
!
C9H18-1+H=C9H17+H2    1.17E7 2.4 4.471E3
C9H18-3+H=C9H17+H2    1.17E7 2.4 4.471E3
C9H18-4+H=C9H17+H2    1.17E7 2.4 4.471E3
!
C9H18-1+CH3=C9H17+CH4    1.36E1 3.46 5.481E3
C9H18-3+CH3=C9H17+CH4    1.36E1 3.46 5.481E3
C9H18-4+CH3=C9H17+CH4    1.36E1 3.46 5.481E3
!
C9H18-1+O=C9H17+OH    4.97E6 2.45 2.83E3
C9H18-3+O=C9H17+OH    4.97E6 2.45 2.83E3
C9H18-4+O=C9H17+OH    4.97E6 2.45 2.83E3
!
!
C8H16-1+HO2=C8H15+H2O2    5.06E2 3.37 1.372E4
C8H16-3+HO2=C8H15+H2O2    5.06E2 3.37 1.372E4
C8H16-4+HO2=C8H15+H2O2    5.06E2 3.37 1.372E4
!
C8H16-1+OH=C8H15+H2O    3.74E8 1.61 -3.5E1
C8H16-3+OH=C8H15+H2O    3.74E8 1.61 -3.5E1
C8H16-4+OH=C8H15+H2O    3.74E8 1.61 -3.5E1
!
C8H16-1+H=C8H15+H2    1.04E7 2.4 4.471E3
C8H16-3+H=C8H15+H2    1.04E7 2.4 4.471E3
C8H16-4+H=C8H15+H2    1.04E7 2.4 4.471E3
!
C8H16-1+CH3=C8H15+CH4    1.21E1 3.46 5.481E3
C8H16-3+CH3=C8H15+CH4    1.21E1 3.46 5.481E3
C8H16-4+CH3=C8H15+CH4    1.21E1 3.46 5.481E3
!
C8H16-1+O=C8H15+OH    4.42E6 2.45 2.83E3
C8H16-3+O=C8H15+OH    4.42E6 2.45 2.83E3
C8H16-4+O=C8H15+OH    4.42E6 2.45 2.83E3
!
!
!
!
!    CLASS 6    ADDITION REACTIONS WITH OLEFINS
!
!
C12H24-1+OH=>CH2O+C11H23-1    1.0E11 0.0 -4.0E3
C12H24-1+OH=>CH3CHO+C10H21-1    1.0E11 0.0 -4.0E3
C12H24-1+O=>CH2CHO+C10H21-1    1.0E11 0.0 -1.05E3
C12H24-2+OH=>CH3CHO+C10H21-1    1.0E11 0.0 -4.0E3
C12H24-2+OH=>C2H5CHO+C9H19-1    1.0E11 0.0 -4.0E3
C12H24-2+O=>CH3CHO+C10H20-1    1.0E11 0.0 -1.05E3
C12H24-3+OH=>C2H5CHO+C9H19-1    1.0E11 0.0 -4.0E3
C12H24-3+OH=>NC3H7CHO+C8H17-1    1.0E11 0.0 -4.0E3
C12H24-3+O=>C2H5CHO+C9H18-1    1.0E11 0.0 -1.05E3
C12H24-4+OH=>NC3H7CHO+C8H17-1    1.0E11 0.0 -4.0E3
C12H24-4+OH=>NC4H9CHO+C7H15-1    1.0E11 0.0 -4.0E3
C12H24-4+O=>NC3H7CHO+C8H16-1    1.0E11 0.0 -1.05E3
C12H24-5+OH=>NC4H9CHO+C7H15-1    1.0E11 0.0 -4.0E3
C12H24-5+OH=>NC5H11CHO+C6H13-1    1.0E11 0.0 -4.0E3
C12H24-5+O=>NC4H9CHO+C7H14-1    1.0E11 0.0 -1.05E3
!
C11H22-1+OH=>CH2O+C10H21-1    1.0E11 0.0 -4.0E3
C11H22-1+OH=>CH3CHO+C9H19-1    1.0E11 0.0 -4.0E3
C11H22-1+O=>CH2CHO+C9H19-1    1.0E11 0.0 -1.05E3
!
C10H20-1+OH=>CH2O+C9H19-1    1.0E11 0.0 -4.0E3
C10H20-1+OH=>CH3CHO+C8H17-1    1.0E11 0.0 -4.0E3
C10H20-1+O=>CH2CHO+C8H17-1    1.0E11 0.0 -1.05E3
C10H20-4+OH=>NC3H7CHO+C6H13-1    1.0E11 0.0 -4.0E3
C10H20-4+OH=>NC4H9CHO+C5H11-1    1.0E11 0.0 -4.0E3
C10H20-4+O=>NC3H7CHO+C6H12-1    1.0E11 0.0 -1.05E3
C10H20-5+OH=>NC4H9CHO+C5H11-1    1.0E11 0.0 -4.0E3
C10H20-5+O=>NC4H9CHO+C5H10-1    1.0E11 0.0 -1.05E3
!
C9H18-1+OH=>CH2O+C8H17-1    1.0E11 0.0 -4.0E3
C9H18-1+OH=>CH3CHO+C7H15-1    1.0E11 0.0 -4.0E3
C9H18-1+O=>CH2CHO+C7H15-1    1.0E11 0.0 -1.05E3
C9H18-3+OH=>C2H5CHO+C6H13-1    1.0E11 0.0 -4.0E3
C9H18-3+OH=>NC3H7CHO+C5H11-1    1.0E11 0.0 -4.0E3
C9H18-3+O=>C2H5CHO+C6H12-1    1.0E11 0.0 -1.05E3
C9H18-4+OH=>NC3H7CHO+C5H11-1    1.0E11 0.0 -4.0E3
C9H18-4+OH=>NC4H9CHO+PC4H9    1.0E11 0.0 -4.0E3
C9H18-4+O=>NC3H7CHO+C5H10-1    1.0E11 0.0 -1.05E3
!
C8H16-1+OH=>CH2O+C7H15-1    1.0E11 0.0 -4.0E3
C8H16-1+OH=>CH3CHO+C6H13-1    1.0E11 0.0 -4.0E3
C8H16-1+O=>CH2CHO+C6H13-1    1.0E11 0.0 -1.05E3
C8H16-3+OH=>C2H5CHO+C5H11-1    1.0E11 0.0 -4.0E3
C8H16-3+OH=>NC3H7CHO+PC4H9    1.0E11 0.0 -4.0E3
C8H16-3+O=>C2H5CHO+C5H10-1    1.0E11 0.0 -1.05E3
C8H16-4+OH=>NC3H7CHO+PC4H9    1.0E11 0.0 -4.0E3
C8H16-4+O=>NC3H7CHO+C4H8-1    1.0E11 0.0 -1.05E3
!
!
!
! CLASS 7
!
!
!
!
!
!
C12H23+HO2=AC3H5CHO+C8H17-1+OH    9.64E12 0.0 0.0E0
C12H23+CH3O2=AC3H5CHO+C8H17-1+CH3O    9.64E12 0.0 0.0E0
C12H23+C2H5O2=AC3H5CHO+C8H17-1+C2H5O    9.64E12 0.0 0.0E0
!
!
C11H21+HO2=AC3H5CHO+C7H15-1+OH    9.64E12 0.0 0.0E0
C11H21+CH3O2=AC3H5CHO+C7H15-1+CH3O    9.64E12 0.0 0.0E0
C11H21+C2H5O2=AC3H5CHO+C7H15-1+C2H5O    9.64E12 0.0 0.0E0
!
!
C10H19+HO2=AC3H5CHO+C6H13-1+OH    9.64E12 0.0 0.0E0
C10H19+CH3O2=AC3H5CHO+C6H13-1+CH3O    9.64E12 0.0 0.0E0
C10H19+C2H5O2=AC3H5CHO+C6H13-1+C2H5O    9.64E12 0.0 0.0E0
!
!
C9H17+HO2=AC3H5CHO+C5H11-1+OH    9.64E12 0.0 0.0E0
C9H17+CH3O2=AC3H5CHO+C5H11-1+CH3O    9.64E12 0.0 0.0E0
C9H17+C2H5O2=AC3H5CHO+C5H11-1+C2H5O    9.64E12 0.0 0.0E0
!
!
C8H15+HO2=AC3H5CHO+PC4H9+OH    9.64E12 0.0 0.0E0
C8H15+CH3O2=AC3H5CHO+PC4H9+CH3O    9.64E12 0.0 0.0E0
C8H15+C2H5O2=AC3H5CHO+PC4H9+C2H5O    9.64E12 0.0 0.0E0
!
!
!
!    CLASS 8    ALKENYL RADICAL DECOMPOSITION
!        GLOBAL REACTIONS
!
!
C12H23=C2H3+C10H20-1    2.5E13 0.0 3.5E4
    REV/1.0E11 0.0E0 9.6E3/
C12H23=C3H5-A+C9H18-1    2.5E13 0.0 2.5E4
    REV/1.0E11 0.0E0 9.6E3/
C12H23=C4H71-1+C8H16-1    2.5E13 0.0 3.0E4
    REV/1.0E11 0.0E0 9.6E3/
C12H23=C6H111-6+C6H12-1    2.5E13 0.0 3.0E4
    REV/1.0E11 0.0E0 9.6E3/
C12H23=C8H15+C4H8-1    2.5E13 0.0 3.0E4
    REV/1.0E11 0.0E0 9.6E3/
C12H23=C9H17+C3H6    2.5E13 0.0 3.0E4
    REV/1.0E11 0.0E0 9.6E3/
C12H23=C10H19+C2H4    2.5E13 0.0 3.0E4
    REV/1.0E11 0.0E0 9.6E3/
!
C11H21=C2H3+C9H18-1    2.5E13 0.0 3.5E4
    REV/1.0E11 0.0E0 9.6E3/
C11H21=C3H5-A+C8H16-1    2.5E13 0.0 2.5E4
    REV/1.0E11 0.0E0 9.6E3/
C11H21=C4H71-1+C7H14-1    2.5E13 0.0 3.0E4
    REV/1.0E11 0.0E0 9.6E3/
C11H21=C6H111-6+C5H10-1    2.5E13 0.0 3.0E4
    REV/1.0E11 0.0E0 9.6E3/
C11H21=C8H15+C3H6    2.5E13 0.0 3.0E4
    REV/1.0E11 0.0E0 9.6E3/
C11H21=C9H17+C2H4    2.5E13 0.0 3.0E4
    REV/1.0E11 0.0E0 9.6E3/
!
C10H19=C2H3+C8H16-1    2.5E13 0.0 3.5E4
    REV/1.0E11 0.0E0 9.6E3/
C10H19=C3H5-A+C7H14-1    2.5E13 0.0 2.5E4
    REV/1.0E11 0.0E0 9.6E3/
C10H19=C4H71-1+C6H12-1    2.5E13 0.0 3.0E4
    REV/1.0E11 0.0E0 9.6E3/
C10H19=C6H111-6+C4H8-1    2.5E13 0.0 3.0E4
    REV/1.0E11 0.0E0 9.6E3/
C10H19=C8H15+C2H4    2.5E13 0.0 3.0E4
    REV/1.0E11 0.0E0 9.6E3/
!
C9H17=C2H3+C7H14-1    2.5E13 0.0 3.5E4
    REV/1.0E11 0.0E0 9.6E3/
C9H17=C3H5-A+C6H12-1    2.5E13 0.0 2.5E4
    REV/1.0E11 0.0E0 9.6E3/
C9H17=C4H71-1+C5H10-1    2.5E13 0.0 3.0E4
    REV/1.0E11 0.0E0 9.6E3/
C9H17=C6H111-6+C3H6    2.5E13 0.0 3.0E4
    REV/1.0E11 0.0E0 9.6E3/
!
C8H15=C2H3+C6H12-1    2.5E13 0.0 3.5E4
    REV/1.0E11 0.0E0 9.6E3/
C8H15=C3H5-A+C5H10-1    2.5E13 0.0 2.5E4
    REV/1.0E11 0.0E0 9.6E3/
C8H15=C4H71-1+C4H8-1    2.5E13 0.0 3.0E4
    REV/1.0E11 0.0E0 9.6E3/
C8H15=C6H111-6+C2H4    2.5E13 0.0 3.0E4
    REV/1.0E11 0.0E0 9.6E3/
!
!
!
!
!
!    CLASS 9    OLEFIN DECOMPOSITION
!
!
C12H24-1=C9H19-1+C3H5-A    2.5E16 0.0 7.1E4
    REV/1.0E13 0.0E0 0.0E0/
C12H24-2=C4H71-1+C8H17-1    2.5E16 0.0 7.1E4
    REV/1.0E13 0.0E0 0.0E0/
C12H24-4=C6H111-6+C6H13-1    2.5E16 0.0 7.1E4
    REV/1.0E13 0.0E0 0.0E0/
!
C11H22-1=C8H17-1+C3H5-A    2.5E16 0.0 7.1E4
    REV/1.0E13 0.0E0 0.0E0/
!
C10H20-1=C7H15-1+C3H5-A    2.5E16 0.0 7.1E4
    REV/1.0E13 0.0E0 0.0E0/
C10H20-4=C6H111-6+PC4H9    2.5E16 0.0 7.1E4
    REV/1.0E13 0.0E0 0.0E0/
!
C9H18-1=C6H13-1+C3H5-A    2.5E16 0.0 7.1E4
    REV/1.0E13 0.0E0 0.0E0/
C9H18-4=C6H111-6+NC3H7    2.5E16 0.0 7.1E4
    REV/1.0E13 0.0E0 0.0E0/
!
C8H16-1=C5H11-1+C3H5-A    2.5E16 0.0 7.1E4
    REV/1.0E13 0.0E0 0.0E0/
C8H16-4=C6H111-6+C2H5    2.5E16 0.0 7.1E4
    REV/1.0E13 0.0E0 0.0E0/
!
!
!       CLASS 10    RETROENE REACTIONS
!
!
C8H16-1=C5H10-1+C3H6    3.98E12 0.0 5.7629E4
C9H18-1=C6H12-1+C3H6    3.98E12 0.0 5.7629E4
C10H20-1=C7H14-1+C3H6    3.98E12 0.0 5.7629E4
C11H22-1=C8H16-1+C3H6    3.98E12 0.0 5.7629E4
C12H24-1=C9H18-1+C3H6    3.98E12 0.0 5.7629E4
C12H24-2=C8H16-1+C4H8-1    3.98E12 0.0 5.7629E4
!
!
C8H16-3=C3H6+C5H10-1    3.98E12 0.0 5.7629E4
C9H18-3=C4H8-1+C5H10-1    3.98E12 0.0 5.7629E4
C12H24-3=C7H14-1+C5H10-1    3.98E12 0.0 5.7629E4
!
!
C8H16-4=C2H4+C6H12-1    3.98E12 0.0 5.7629E4
C9H18-4=C3H6+C6H12-1    3.98E12 0.0 5.7629E4
C10H20-4=C4H8-1+C6H12-1    3.98E12 0.0 5.7629E4
C12H24-4=2C6H12-1    3.98E12 0.0 5.7629E4
!
!
C9H18-4=C2H4+C7H14-1    3.98E12 0.0 5.7629E4
C10H20-4=C2H4+C8H16-1    3.98E12 0.0 5.7629E4
C12H24-4=C2H4+C10H20-1    3.98E12 0.0 5.7629E4
!
!
C10H20-5=C3H6+C7H14-1    3.98E12 0.0 5.7629E4
C12H24-5=C5H10-1+C7H14-1    3.98E12 0.0 5.7629E4
C12H24-5=C3H6+C9H18-1    3.98E12 0.0 5.7629E4
!
!
!
!
!     CLASS 11
!
!    ADDITION OF O2 TO ALKYL RADICALS
!
C12H25-1+O2=C12H25O2-1    4.52E12 0.0 0.0E0
C12H25-2+O2=C12H25O2-2    7.54E12 0.0 0.0E0
C12H25-3+O2=C12H25O2-3    7.54E12 0.0 0.0E0
C12H25-4+O2=C12H25O2-4    7.54E12 0.0 0.0E0
C12H25-5+O2=C12H25O2-5    7.54E12 0.0 0.0E0
C12H25-6+O2=C12H25O2-6    7.54E12 0.0 0.0E0
C11H23-1+O2=C11H23O2-1    4.52E12 0.0 0.0E0
C11H23-4+O2=C11H23O2-4    7.54E12 0.0 0.0E0
C11H23-5+O2=C11H23O2-5    7.54E12 0.0 0.0E0
C10H21-1+O2=C10H21O2-1    4.52E12 0.0 0.0E0
C10H21-2+O2=C10H21O2-2    7.54E12 0.0 0.0E0
C10H21-4+O2=C10H21O2-4    7.54E12 0.0 0.0E0
C10H21-5+O2=C10H21O2-5    7.54E12 0.0 0.0E0
C9H19-1+O2=C9H19O2-1    4.52E12 0.0 0.0E0
C9H19-4+O2=C9H19O2-4    7.54E12 0.0 0.0E0
C9H19-5+O2=C9H19O2-5    7.54E12 0.0 0.0E0
C8H17-1+O2=C8H17O2-1    4.52E12 0.0 0.0E0
C8H17-3+O2=C8H17O2-3    7.54E12 0.0 0.0E0
C8H17-4+O2=C8H17O2-4    7.54E12 0.0 0.0E0
!
!
!     CLASS 12
!
!    R + RO2  =  RO + RO
!
!
C12H25-1+C12H25O2-1=2C12H25O-1    7.0E12 0.0 -1.0E3
C12H25-1+C12H25O2-2=C12H25O-1+C12H25O-2    7.0E12 0.0 -1.0E3
C12H25-1+C12H25O2-3=C12H25O-1+C12H25O-3    7.0E12 0.0 -1.0E3
C12H25-1+C12H25O2-4=C12H25O-1+C12H25O-4    7.0E12 0.0 -1.0E3
C12H25-1+C12H25O2-5=C12H25O-1+C12H25O-5    7.0E12 0.0 -1.0E3
C12H25-1+C12H25O2-6=C12H25O-1+C12H25O-6    7.0E12 0.0 -1.0E3
C12H25-2+C12H25O2-1=C12H25O-2+C12H25O-1    7.0E12 0.0 -1.0E3
C12H25-2+C12H25O2-2=2C12H25O-2    7.0E12 0.0 -1.0E3
C12H25-2+C12H25O2-3=C12H25O-2+C12H25O-3    7.0E12 0.0 -1.0E3
C12H25-2+C12H25O2-4=C12H25O-2+C12H25O-4    7.0E12 0.0 -1.0E3
C12H25-2+C12H25O2-5=C12H25O-2+C12H25O-5    7.0E12 0.0 -1.0E3
C12H25-2+C12H25O2-6=C12H25O-2+C12H25O-6    7.0E12 0.0 -1.0E3
C12H25-3+C12H25O2-1=C12H25O-3+C12H25O-1    7.0E12 0.0 -1.0E3
C12H25-3+C12H25O2-2=C12H25O-3+C12H25O-2    7.0E12 0.0 -1.0E3
C12H25-3+C12H25O2-3=2C12H25O-3    7.0E12 0.0 -1.0E3
C12H25-3+C12H25O2-4=C12H25O-3+C12H25O-4    7.0E12 0.0 -1.0E3
C12H25-3+C12H25O2-5=C12H25O-3+C12H25O-5    7.0E12 0.0 -1.0E3
C12H25-3+C12H25O2-6=C12H25O-3+C12H25O-6    7.0E12 0.0 -1.0E3
C12H25-4+C12H25O2-1=C12H25O-4+C12H25O-1    7.0E12 0.0 -1.0E3
C12H25-4+C12H25O2-2=C12H25O-4+C12H25O-2    7.0E12 0.0 -1.0E3
C12H25-4+C12H25O2-3=C12H25O-4+C12H25O-3    7.0E12 0.0 -1.0E3
C12H25-4+C12H25O2-4=2C12H25O-4    7.0E12 0.0 -1.0E3
C12H25-4+C12H25O2-5=C12H25O-4+C12H25O-5    7.0E12 0.0 -1.0E3
C12H25-4+C12H25O2-6=C12H25O-4+C12H25O-6    7.0E12 0.0 -1.0E3
C12H25-5+C12H25O2-1=C12H25O-5+C12H25O-1    7.0E12 0.0 -1.0E3
C12H25-5+C12H25O2-2=C12H25O-5+C12H25O-2    7.0E12 0.0 -1.0E3
C12H25-5+C12H25O2-3=C12H25O-5+C12H25O-3    7.0E12 0.0 -1.0E3
C12H25-5+C12H25O2-4=C12H25O-5+C12H25O-4    7.0E12 0.0 -1.0E3
C12H25-5+C12H25O2-5=2C12H25O-5    7.0E12 0.0 -1.0E3
C12H25-5+C12H25O2-6=C12H25O-5+C12H25O-6    7.0E12 0.0 -1.0E3
C12H25-6+C12H25O2-1=C12H25O-6+C12H25O-1    7.0E12 0.0 -1.0E3
C12H25-6+C12H25O2-2=C12H25O-6+C12H25O-2    7.0E12 0.0 -1.0E3
C12H25-6+C12H25O2-3=C12H25O-6+C12H25O-3    7.0E12 0.0 -1.0E3
C12H25-6+C12H25O2-4=C12H25O-6+C12H25O-4    7.0E12 0.0 -1.0E3
C12H25-6+C12H25O2-5=C12H25O-6+C12H25O-5    7.0E12 0.0 -1.0E3
C12H25-6+C12H25O2-6=2C12H25O-6    7.0E12 0.0 -1.0E3
!
!
!
!     CLASS 13
!
!    R + HO2  =  RO + OH REACTIONS
!
!
C12H25-1+HO2=C12H25O-1+OH    7.0E12 0.0 -1.0E3
C12H25-2+HO2=C12H25O-2+OH    7.0E12 0.0 -1.0E3
C12H25-3+HO2=C12H25O-3+OH    7.0E12 0.0 -1.0E3
C12H25-4+HO2=C12H25O-4+OH    7.0E12 0.0 -1.0E3
C12H25-5+HO2=C12H25O-5+OH    7.0E12 0.0 -1.0E3
C12H25-6+HO2=C12H25O-6+OH    7.0E12 0.0 -1.0E3
!
!     CLASS 14
!
!    R + CH3O2  =  RO + OH REACTIONS
!
!
C12H25-1+CH3O2=C12H25O-1+CH3O    7.0E12 0.0 -1.0E3
C12H25-2+CH3O2=C12H25O-2+CH3O    7.0E12 0.0 -1.0E3
C12H25-3+CH3O2=C12H25O-3+CH3O    7.0E12 0.0 -1.0E3
C12H25-4+CH3O2=C12H25O-4+CH3O    7.0E12 0.0 -1.0E3
C12H25-5+CH3O2=C12H25O-5+CH3O    7.0E12 0.0 -1.0E3
C12H25-6+CH3O2=C12H25O-6+CH3O    7.0E12 0.0 -1.0E3
!
!      CLASS 15
!
!    RO2 ISOMERIZATION
!      INCLUDES TRANSITION STATE RINGS OF 5, 6, 7, AND 8 ATOMS
!
!
C12H25O2-1=C12OOH1-2    2.0E11 0.0 2.645E4
C12H25O2-1=C12OOH1-3    2.5E10 0.0 2.045E4
C12H25O2-1=C12OOH1-4    3.125E9 0.0 1.865E4
C12H25O2-2=C12OOH2-3    2.0E11 0.0 2.645E4
C12H25O2-2=C12OOH2-4    2.5E10 0.0 2.045E4
C12H25O2-2=C12OOH2-5    3.125E9 0.0 1.865E4
C12H25O2-3=C12OOH3-1    3.75E10 0.0 2.4E4
C12H25O2-3=C12OOH3-2    2.0E11 0.0 2.645E4
C12H25O2-3=C12OOH3-4    2.0E11 0.0 2.645E4
C12H25O2-3=C12OOH3-5    2.5E10 0.0 2.045E4
C12H25O2-3=C12OOH3-6    3.125E9 0.0 1.865E4
C12H25O2-4=C12OOH4-1    4.68E9 0.0 2.195E4
C12H25O2-4=C12OOH4-2    2.5E10 0.0 2.045E4
C12H25O2-4=C12OOH4-5    2.0E11 0.0 2.645E4
C12H25O2-4=C12OOH4-6    2.5E10 0.0 2.045E4
C12H25O2-4=C12OOH4-7    3.125E9 0.0 1.865E4
C12H25O2-5=C12OOH5-2    3.125E9 0.0 1.865E4
C12H25O2-5=C12OOH5-3    2.5E10 0.0 2.045E4
C12H25O2-5=C12OOH5-6    2.0E11 0.0 2.645E4
C12H25O2-5=C12OOH5-7    2.5E10 0.0 2.045E4
C12H25O2-5=C12OOH5-8    3.125E9 0.0 1.865E4
C12H25O2-6=C12OOH6-3    3.125E9 0.0 1.865E4
C12H25O2-6=C12OOH6-4    2.5E10 0.0 2.045E4
C12H25O2-6=C12OOH6-8    2.5E10 0.0 2.045E4
C12H25O2-6=C12OOH6-9    3.125E9 0.0 1.865E4
C11H23O2-1=C11OOH1-3    2.5E10 0.0 2.045E4
C11H23O2-4=C11OOH4-2    2.5E10 0.0 2.045E4
C11H23O2-5=C11OOH5-3    2.5E10 0.0 2.045E4
C10H21O2-1=C10OOH1-3    2.5E10 0.0 2.045E4
C10H21O2-1=C10OOH1-4    3.125E9 0.0 1.865E4
C10H21O2-2=C10OOH2-4    2.5E10 0.0 2.045E4
C10H21O2-4=C10OOH4-2    2.5E10 0.0 2.045E4
C10H21O2-5=C10OOH5-4    2.0E11 0.0 2.645E4
C10H21O2-5=C10OOH5-6    2.0E11 0.0 2.645E4
C10H21O2-5=C10OOH5-7    2.5E10 0.0 2.045E4
!
C9H19O2-1=C9OOH1-2    2.0E11 0.0 2.645E4
C9H19O2-1=C9OOH1-3    2.5E10 0.0 2.045E4
C9H19O2-4=C9OOH4-3    2.0E11 0.0 2.645E4
C9H19O2-4=C9OOH4-5    2.0E11 0.0 2.645E4
C9H19O2-4=C9OOH4-6    2.5E10 0.0 2.045E4
C9H19O2-5=C9OOH5-3    2.5E10 0.0 2.045E4
C9H19O2-5=C9OOH5-4    2.0E11 0.0 2.645E4
!
C8H17O2-1=C8OOH1-2    2.0E11 0.0 2.645E4
C8H17O2-1=C8OOH1-3    2.5E10 0.0 2.045E4
C8H17O2-1=C8OOH1-4    3.125E9 0.0 1.865E4
C8H17O2-3=C8OOH3-4    2.0E11 0.0 2.645E4
C8H17O2-3=C8OOH3-5    2.5E10 0.0 2.045E4
C8H17O2-4=C8OOH4-2    2.5E10 0.0 2.045E4
C8H17O2-4=C8OOH4-3    2.0E11 0.0 2.645E4
C8H17O2-4=C8OOH4-5    2.0E11 0.0 2.645E4
C8H17O2-4=C8OOH4-6    2.5E10 0.0 2.045E4
!
!
!
!  CLASS 16 RO2=HO2+ALKENE DIRECT ELIMINATION OF HO2 AND ALKENE FROM RO2
!
!
!
C12H25O2-1=C12H24-1+HO2    4.308E36 -7.5 3.951E4
C12H25O2-2=C12H24-1+HO2    5.92E42 -9.43 4.153E4
C12H25O2-2=C12H24-2+HO2    4.308E36 -7.5 3.951E4
C12H25O2-3=C12H24-2+HO2    4.308E36 -7.5 3.951E4
C12H25O2-3=C12H24-3+HO2    4.308E36 -7.5 3.951E4
C12H25O2-4=C12H24-3+HO2    4.308E36 -7.5 3.951E4
C12H25O2-4=C12H24-4+HO2    4.308E36 -7.5 3.951E4
C12H25O2-5=C12H24-4+HO2    4.308E36 -7.5 3.951E4
C12H25O2-5=C12H24-5+HO2    4.308E36 -7.5 3.951E4
C12H25O2-6=C12H24-5+HO2    4.308E36 -7.5 3.951E4
!
!
C11H23O2-1=C11H22-1+HO2    4.308E36 -7.5 3.951E4
!
!
!
C10H21O2-1=C10H20-1+HO2    4.308E36 -7.5 3.951E4
C10H21O2-2=C10H20-1+HO2    5.92E42 -9.43 4.153E4
C10H21O2-4=C10H20-4+HO2    4.308E36 -7.5 3.951E4
C10H21O2-5=C10H20-4+HO2    4.308E36 -7.5 3.951E4
C10H21O2-5=C10H20-5+HO2    4.308E36 -7.5 3.951E4
!
!
C9H19O2-1=C9H18-1+HO2    4.308E36 -7.5 3.951E4
C9H19O2-4=C9H18-3+HO2    4.308E36 -7.5 3.951E4
C9H19O2-4=C9H18-4+HO2    4.308E36 -7.5 3.951E4
C9H19O2-5=C9H18-4+HO2    4.308E36 -7.5 3.951E4
!
!
C8H17O2-1=C8H16-1+HO2    4.308E36 -7.5 3.951E4
C8H17O2-3=C8H16-3+HO2    4.308E36 -7.5 3.951E4
C8H17O2-4=C8H16-3+HO2    4.308E36 -7.5 3.951E4
C8H17O2-4=C8H16-4+HO2    4.308E36 -7.5 3.951E4
C12H25O2-2+HO2=C12H25O2H-2+O2    1.75E10 0.0 -3.275E3
C12H25O2-3+HO2=C12H25O2H-3+O2    1.75E10 0.0 -3.275E3
C12H25O2-2+H2O2=C12H25O2H-2+HO2    2.4E12 0.0 1.0E4
C12H25O2-3+H2O2=C12H25O2H-3+HO2    2.4E12 0.0 1.0E4
!
!
!
!     CLASS 19   RO2 + CH3O2  =  RO + CH3O + O2
!
!
C12H25O2-1+CH3O2=>C12H25O-1+CH3O+O2    1.4E16 -1.61 1.86E3
C12H25O2-2+CH3O2=>C12H25O-2+CH3O+O2    1.4E16 -1.61 1.86E3
C12H25O2-3+CH3O2=>C12H25O-3+CH3O+O2    1.4E16 -1.61 1.86E3
C12H25O2-4+CH3O2=>C12H25O-4+CH3O+O2    1.4E16 -1.61 1.86E3
C12H25O2-5+CH3O2=>C12H25O-5+CH3O+O2    1.4E16 -1.61 1.86E3
C12H25O2-6+CH3O2=>C12H25O-6+CH3O+O2    1.4E16 -1.61 1.86E3
!
!
!
!
!     CLASS 20
!
!    RO2 + RO2  =  RO + RO + O2
!
!
2C12H25O2-1=>2C12H25O-1+O2    1.4E16 -1.61 1.86E3
C12H25O2-1+C12H25O2-2=>C12H25O-1+C12H25O-2+O2    1.4E16 -1.61 1.86E3
C12H25O2-1+C12H25O2-3=>C12H25O-1+C12H25O-3+O2    1.4E16 -1.61 1.86E3
C12H25O2-1+C12H25O2-4=>C12H25O-1+C12H25O-4+O2    1.4E16 -1.61 1.86E3
C12H25O2-1+C12H25O2-5=>C12H25O-1+C12H25O-5+O2    1.4E16 -1.61 1.86E3
C12H25O2-1+C12H25O2-6=>C12H25O-1+C12H25O-6+O2    1.4E16 -1.61 1.86E3
!
2C12H25O2-2=>2C12H25O-2+O2    1.4E16 -1.61 1.86E3
C12H25O2-2+C12H25O2-3=>C12H25O-2+C12H25O-3+O2    1.4E16 -1.61 1.86E3
C12H25O2-2+C12H25O2-4=>C12H25O-2+C12H25O-4+O2    1.4E16 -1.61 1.86E3
C12H25O2-2+C12H25O2-5=>C12H25O-2+C12H25O-5+O2    1.4E16 -1.61 1.86E3
C12H25O2-2+C12H25O2-6=>C12H25O-2+C12H25O-6+O2    1.4E16 -1.61 1.86E3
!
2C12H25O2-3=>2C12H25O-3+O2    1.4E16 -1.61 1.86E3
C12H25O2-3+C12H25O2-4=>C12H25O-3+C12H25O-4+O2    1.4E16 -1.61 1.86E3
C12H25O2-3+C12H25O2-5=>C12H25O-3+C12H25O-5+O2    1.4E16 -1.61 1.86E3
C12H25O2-3+C12H25O2-6=>C12H25O-3+C12H25O-6+O2    1.4E16 -1.61 1.86E3
!
2C12H25O2-4=>2C12H25O-4+O2    1.4E16 -1.61 1.86E3
C12H25O2-4+C12H25O2-5=>C12H25O-4+C12H25O-5+O2    1.4E16 -1.61 1.86E3
C12H25O2-4+C12H25O2-6=>C12H25O-4+C12H25O-6+O2    1.4E16 -1.61 1.86E3
!
2C12H25O2-5=>2C12H25O-5+O2    1.4E16 -1.61 1.86E3
C12H25O2-5+C12H25O2-6=>C12H25O-5+C12H25O-6+O2    1.4E16 -1.61 1.86E3
!
2C12H25O2-6=>2C12H25O-6+O2    1.4E16 -1.61 1.86E3
C12H25O2H-2=C12H25O-2+OH    1.0E16 0.0 3.9E4
C12H25O2H-3=C12H25O-3+OH    1.0E16 0.0 3.9E4
!
!
!
!
!   CLASS 22   ALKOXY RADICAL DECOMPOSITION
!
!
!
CH2O+C11H23-1=C12H25O-1    1.0E11 0.0 1.19E4
CH3CHO+C10H21-1=C12H25O-2    1.0E11 0.0 1.19E4
C2H5CHO+C9H19-1=C12H25O-3    1.0E11 0.0 1.19E4
NC3H7CHO+C8H17-1=C12H25O-4    1.0E11 0.0 1.19E4
NC4H9CHO+C7H15-1=C12H25O-5    1.0E11 0.0 1.19E4
NC5H11CHO+C6H13-1=C12H25O-6    1.0E11 0.0 1.19E4
!
!
!
!
!      CLASS 23
!
!     QOOH = CYCLIC ETHER + OH
!
!
!
C12OOH1-2=>C12O1-2+OH    6.0E11 0.0 2.2E4
C12OOH3-4=>C12O3-4+OH    6.0E11 0.0 2.2E4
!
!
!
C12OOH1-3=>C12O1-3+OH    7.5E10 0.0 1.525E4
C12OOH3-1=>C12O1-3+OH    7.5E10 0.0 1.525E4
C12OOH2-4=>C12O2-4+OH    7.5E10 0.0 1.525E4
C12OOH4-2=>C12O2-4+OH    7.5E10 0.0 1.525E4
C12OOH3-5=>C12O3-5+OH    7.5E10 0.0 1.525E4
C12OOH5-3=>C12O3-5+OH    7.5E10 0.0 1.525E4
C12OOH4-6=>C12O4-6+OH    7.5E10 0.0 1.525E4
C12OOH6-4=>C12O4-6+OH    7.5E10 0.0 1.525E4
!
!
C11OOH1-3=>C11O1-3+OH    7.5E10 0.0 1.525E4
C11OOH4-2=>C11O2-4+OH    7.5E10 0.0 1.525E4
C11OOH5-3=>C11O3-5+OH    7.5E10 0.0 1.525E4
!
!
C10OOH1-3=>C10O1-3+OH    7.5E10 0.0 1.525E4
C10OOH2-4=>C10O2-4+OH    7.5E10 0.0 1.525E4
C10OOH4-2=>C10O2-4+OH    7.5E10 0.0 1.525E4
!
!
C9OOH1-3=>C9O1-3+OH    7.5E10 0.0 1.525E4
C9OOH5-3=>C9O3-5+OH    7.5E10 0.0 1.525E4
C9OOH4-6=>C9O4-6+OH    7.5E10 0.0 1.525E4
!
!
C8OOH1-3=>C8O1-3+OH    7.5E10 0.0 1.525E4
C8OOH4-2=>C8O2-4+OH    7.5E10 0.0 1.525E4
C8OOH3-5=>C8O3-5+OH    7.5E10 0.0 1.525E4
!
!
!
C12OOH1-4=>C12O1-4+OH    9.375E9 0.0 7.0E3
C12OOH4-1=>C12O1-4+OH    9.375E9 0.0 7.0E3
C12OOH2-5=>C12O2-5+OH    9.375E9 0.0 7.0E3
C12OOH5-2=>C12O2-5+OH    9.375E9 0.0 7.0E3
C12OOH3-6=>C12O3-6+OH    9.375E9 0.0 7.0E3
C12OOH6-3=>C12O3-6+OH    9.375E9 0.0 7.0E3
C12OOH4-7=>C12O4-7+OH    9.375E9 0.0 7.0E3
C12OOH6-9=>C12O4-7+OH    9.375E9 0.0 7.0E3
C12OOH5-8=>C12O5-8+OH    9.375E9 0.0 7.0E3
!
!
C10OOH1-4=>C10O1-4+OH    9.375E9 0.0 7.0E3
!
!
C8OOH1-4=>C8O1-4+OH    9.375E9 0.0 7.0E3
!
!
!
!
!      CLASS 24
!
!     QOOH  =  Q + HO2
!
!
C12H24-1+HO2=C12OOH1-2    1.0E11 0.0 1.19E4
C12H24-2+HO2=C12OOH2-3    1.0E11 0.0 1.19E4
C12H24-2+HO2=C12OOH3-2    1.0E11 0.0 1.19E4
C12H24-3+HO2=C12OOH3-4    1.0E11 0.0 1.19E4
C12H24-4+HO2=C12OOH4-5    1.0E11 0.0 1.19E4
C12H24-5+HO2=C12OOH5-6    1.0E11 0.0 1.19E4
C10H20-4+HO2=C10OOH5-4    1.0E11 0.0 1.19E4
C10H20-5+HO2=C10OOH5-6    1.0E11 0.0 1.19E4
!
!
C9H18-1+HO2=C9OOH1-2    1.0E11 0.0 1.19E4
C9H18-3+HO2=C9OOH4-3    1.0E11 0.0 1.19E4
C9H18-4+HO2=C9OOH4-5    1.0E11 0.0 1.19E4
C9H18-4+HO2=C9OOH5-4    1.0E11 0.0 1.19E4
!
!
C8H16-1+HO2=C8OOH1-2    1.0E11 0.0 1.19E4
C8H16-3+HO2=C8OOH3-4    1.0E11 0.0 1.19E4
C8H16-3+HO2=C8OOH4-3    1.0E11 0.0 1.19E4
C8H16-4+HO2=C8OOH4-5    1.0E11 0.0 1.19E4
!
!
!
!
!
!
!    CLASS 25    BETA DECOMPOSITION OF ROOH
!
!
C12OOH1-3=>OH+CH2O+C11H22-1    1.0E13 0.0 3.0E4
C12OOH2-4=>OH+CH3CHO+C10H20-1    1.0E13 0.0 3.0E4
C12OOH3-1=>OH+C2H4+NC9H19CHO    1.0E13 0.0 3.0E4
C12OOH3-5=>OH+C2H5CHO+C9H18-1    1.0E13 0.0 3.0E4
C12OOH4-2=>OH+C3H6+NC8H17CHO    1.0E13 0.0 3.0E4
C12OOH4-6=>OH+NC3H7CHO+C8H16-1    1.0E13 0.0 3.0E4
C12OOH5-3=>OH+C4H8-1+NC7H15CHO    1.0E13 0.0 3.0E4
C12OOH5-7=>OH+NC4H9CHO+C7H14-1    1.0E13 0.0 3.0E4
C12OOH6-4=>OH+C5H10-1+NC6H13CHO    1.0E13 0.0 3.0E4
C12OOH6-8=>OH+NC5H11CHO+C6H12-1    1.0E13 0.0 3.0E4
!
C11OOH1-3=>OH+CH2O+C10H20-1    1.0E13 0.0 3.0E4
C11OOH4-2=>OH+C3H6+NC7H15CHO    1.0E13 0.0 3.0E4
C11OOH5-3=>OH+C4H8-1+NC6H13CHO    1.0E13 0.0 3.0E4
!
C10OOH1-3=>OH+CH2O+C9H18-1    1.0E13 0.0 3.0E4
C10OOH2-4=>OH+CH3CHO+C8H16-1    1.0E13 0.0 3.0E4
C10OOH4-2=>OH+C3H6+NC6H13CHO    1.0E13 0.0 3.0E4
C10OOH5-7=>OH+NC4H9CHO+C5H10-1    1.0E13 0.0 3.0E4
!
C9OOH1-3=>OH+CH2O+C8H16-1    1.0E13 0.0 3.0E4
C9OOH4-6=>OH+NC3H7CHO+C5H10-1    1.0E13 0.0 3.0E4
C9OOH5-3=>OH+C4H8-1+NC4H9CHO    1.0E13 0.0 3.0E4
!
C8OOH1-3=>OH+CH2O+C7H14-1    1.0E13 0.0 3.0E4
C8OOH3-5=>OH+C2H5CHO+C5H10-1    1.0E13 0.0 3.0E4
C8OOH4-2=>OH+C3H6+NC4H9CHO    1.0E13 0.0 3.0E4
C8OOH4-6=>OH+NC3H7CHO+C4H8-1    1.0E13 0.0 3.0E4
!
!
!
!     CLASS 26     QOOH + O2  =  O2QOOH
!
!   ADDITION OF SECOND O2
!
!
C12OOH1-2+O2=C12OOH1-2O2    7.54E12 0.0 0.0E0
C12OOH1-3+O2=C12OOH1-3O2    7.54E12 0.0 0.0E0
C12OOH1-4+O2=C12OOH1-4O2    7.54E12 0.0 0.0E0
C12OOH2-3+O2=C12OOH2-3O2    7.54E12 0.0 0.0E0
C12OOH2-4+O2=C12OOH2-4O2    7.54E12 0.0 0.0E0
C12OOH2-5+O2=C12OOH2-5O2    7.54E12 0.0 0.0E0
!
C12OOH3-1+O2=C12OOH3-1O2    4.52E12 0.0 0.0E0
C12OOH3-2+O2=C12OOH3-2O2    7.54E12 0.0 0.0E0
C12OOH3-4+O2=C12OOH3-4O2    7.54E12 0.0 0.0E0
C12OOH3-5+O2=C12OOH3-5O2    7.54E12 0.0 0.0E0
C12OOH3-6+O2=C12OOH3-6O2    7.54E12 0.0 0.0E0
C12OOH4-2+O2=C12OOH4-2O2    7.54E12 0.0 0.0E0
C12OOH4-5+O2=C12OOH4-5O2    7.54E12 0.0 0.0E0
C12OOH4-6+O2=C12OOH4-6O2    7.54E12 0.0 0.0E0
C12OOH4-7+O2=C12OOH4-7O2    7.54E12 0.0 0.0E0
C12OOH5-2+O2=C12OOH5-2O2    7.54E12 0.0 0.0E0
C12OOH5-3+O2=C12OOH5-3O2    7.54E12 0.0 0.0E0
C12OOH5-6+O2=C12OOH5-6O2    7.54E12 0.0 0.0E0
C12OOH5-7+O2=C12OOH5-7O2    7.54E12 0.0 0.0E0
C12OOH5-8+O2=C12OOH5-8O2    7.54E12 0.0 0.0E0
C12OOH6-3+O2=C12OOH6-3O2    7.54E12 0.0 0.0E0
C12OOH6-4+O2=C12OOH6-4O2    7.54E12 0.0 0.0E0
C12OOH6-8+O2=C12OOH6-8O2    7.54E12 0.0 0.0E0
C12OOH6-9+O2=C12OOH6-9O2    7.54E12 0.0 0.0E0
C11OOH1-3+O2=C11OOH1-3O2    7.54E12 0.0 0.0E0
C10OOH1-3+O2=C10OOH1-3O2    7.54E12 0.0 0.0E0
C10OOH5-4+O2=C10OOH5-4O2    7.54E12 0.0 0.0E0
C10OOH5-6+O2=C10OOH5-6O2    7.54E12 0.0 0.0E0
!
C9OOH1-2+O2=C9OOH1-2O2    7.54E12 0.0 0.0E0
C9OOH1-3+O2=C9OOH1-3O2    7.54E12 0.0 0.0E0
C9OOH4-3+O2=C9OOH4-3O2    7.54E12 0.0 0.0E0
C9OOH4-5+O2=C9OOH4-5O2    7.54E12 0.0 0.0E0
C9OOH5-4+O2=C9OOH5-4O2    7.54E12 0.0 0.0E0
!
C8OOH1-2+O2=C8OOH1-2O2    7.54E12 0.0 0.0E0
C8OOH1-3+O2=C8OOH1-3O2    7.54E12 0.0 0.0E0
C8OOH3-4+O2=C8OOH3-4O2    7.54E12 0.0 0.0E0
C8OOH4-3+O2=C8OOH4-3O2    7.54E12 0.0 0.0E0
C8OOH4-5+O2=C8OOH4-5O2    7.54E12 0.0 0.0E0
C8OOH4-6+O2=C8OOH4-6O2    7.54E12 0.0 0.0E0
!
!
!
!     CLASS 27    PRODUCTION OF KETOHYDROPEROXIDES
!
!     ALTERNATIVE PATHWAYS NOT YET INCLUDED
!
!
C12OOH1-2O2=C12KET1-2+OH    2.0E11 0.0 2.6E4
C12OOH1-3O2=C12KET1-3+OH    2.5E10 0.0 2.1E4
C12OOH1-4O2=C12KET1-4+OH    3.125E9 0.0 1.895E4
C12OOH2-3O2=C12KET2-3+OH    1.0E11 0.0 2.345E4
C12OOH2-4O2=C12KET2-4+OH    1.25E10 0.0 1.745E4
C12OOH2-5O2=C12KET2-5+OH    1.563E9 0.0 1.565E4
!
C12OOH3-1O2=C12KET3-1+OH    1.25E10 0.0 1.745E4
C12OOH3-2O2=C12KET3-2+OH    1.0E11 0.0 2.345E4
C12OOH3-4O2=C12KET3-4+OH    1.0E11 0.0 2.345E4
C12OOH3-5O2=C12KET3-5+OH    1.25E10 0.0 1.745E4
C12OOH3-6O2=C12KET3-6+OH    1.563E9 0.0 1.565E4
C12OOH4-2O2=C12KET4-2+OH    1.25E10 0.0 1.745E4
C12OOH4-5O2=C12KET4-5+OH    1.0E11 0.0 2.345E4
C12OOH4-6O2=C12KET4-6+OH    1.25E10 0.0 1.745E4
C12OOH4-7O2=C12KET4-7+OH    1.563E9 0.0 1.565E4
C12OOH5-2O2=C12KET5-2+OH    1.563E9 0.0 1.565E4
C12OOH5-3O2=C12KET5-3+OH    1.25E10 0.0 1.745E4
C12OOH5-6O2=C12KET5-6+OH    1.0E11 0.0 2.345E4
C12OOH5-7O2=C12KET5-7+OH    1.25E10 0.0 1.745E4
C12OOH5-8O2=C12KET5-8+OH    1.563E9 0.0 1.565E4
C12OOH6-3O2=C12KET6-3+OH    1.563E9 0.0 1.565E4
C12OOH6-4O2=C12KET6-4+OH    1.25E10 0.0 1.745E4
C12OOH6-8O2=C12KET6-8+OH    1.25E10 0.0 1.745E4
C12OOH6-9O2=C12KET6-9+OH    1.563E9 0.0 1.565E4
C11OOH1-3O2=C11KET1-3+OH    2.5E10 0.0 2.1E4
C10OOH1-3O2=C10KET1-3+OH    2.5E10 0.0 2.1E4
C10OOH5-4O2=C10KET5-4+OH    1.0E11 0.0 2.345E4
C10OOH5-6O2=C10KET5-6+OH    1.0E11 0.0 2.345E4
!
C9OOH1-2O2=C9KET1-2+OH    2.0E11 0.0 2.6E4
C9OOH1-3O2=C9KET1-3+OH    2.5E10 0.0 2.1E4
C9OOH4-3O2=C9KET4-3+OH    1.0E11 0.0 2.345E4
C9OOH4-5O2=C9KET4-5+OH    1.0E11 0.0 2.345E4
C9OOH5-4O2=C9KET5-4+OH    1.0E11 0.0 2.345E4
!
C8OOH1-2O2=C8KET1-2+OH    2.0E11 0.0 2.6E4
C8OOH1-3O2=C8KET1-3+OH    2.5E10 0.0 2.1E4
C8OOH3-4O2=C8KET3-4+OH    1.0E11 0.0 2.345E4
C8OOH4-3O2=C8KET4-3+OH    1.0E11 0.0 2.345E4
C8OOH4-5O2=C8KET4-5+OH    1.0E11 0.0 2.345E4
C8OOH4-6O2=C8KET4-6+OH    1.25E10 0.0 1.745E4
!
!
!
!     CLASS 28   KETOHYDROPEROXIDE DECOMP.
!
!
!
C12KET1-2=>OH+HCO+NC10H21CHO    1.0E16 0.0 3.9E4
C12KET1-3=>OH+CH2CHO+NC9H19CHO    1.0E16 0.0 3.9E4
C12KET1-4=>OH+CH2CH2CHO+NC8H17CHO    1.0E16 0.0 3.9E4
C12KET2-3=>OH+CH3CO+NC9H19CHO    1.0E16 0.0 3.9E4
C12KET2-4=>OH+CH3COCH2+NC8H17CHO    1.0E16 0.0 3.9E4
C12KET2-5=>OH+CH2CH2COCH3+NC7H15CHO    1.0E16 0.0 3.9E4
C12KET3-1=>OH+CH2O+C9H19COCH2    1.0E16 0.0 3.9E4
C12KET3-2=>OH+CH3CHO+NC9H19CO    1.0E16 0.0 3.9E4
C12KET3-4=>OH+C2H5CO+NC8H17CHO    1.0E16 0.0 3.9E4
C12KET3-5=>OH+C2H5COCH2+NC7H15CHO    1.0E16 0.0 3.9E4
C12KET3-6=>OH+C2H5COC2H4P+NC6H13CHO    1.0E16 0.0 3.9E4
C12KET4-2=>OH+CH3CHO+C8H17COCH2    1.0E16 0.0 3.9E4
C12KET4-5=>OH+NC3H7CO+NC7H15CHO    1.0E16 0.0 3.9E4
C12KET4-6=>OH+NC3H7COCH2+NC6H13CHO    1.0E16 0.0 3.9E4
C12KET4-7=>OH+NC3H7COC2H4P+NC5H11CHO    1.0E16 0.0 3.9E4
C12KET5-2=>OH+CH3CHO+C7COC2H4P    1.0E16 0.0 3.9E4
C12KET5-3=>OH+C2H5CHO+C7H15COCH2    1.0E16 0.0 3.9E4
C12KET5-6=>OH+NC4H9CO+NC6H13CHO    1.0E16 0.0 3.9E4
C12KET5-7=>OH+NC4H9COCH2+NC5H11CHO    1.0E16 0.0 3.9E4
C12KET5-8=>OH+C4COC2H4P+NC4H9CHO    1.0E16 0.0 3.9E4
C12KET6-3=>OH+C2H5CHO+C6COC2H4P    1.0E16 0.0 3.9E4
C12KET6-4=>OH+NC3H7CHO+C6H13COCH2    1.0E16 0.0 3.9E4
C12KET6-8=>OH+C5H11COCH2+NC4H9CHO    1.0E16 0.0 3.9E4
C12KET6-9=>OH+C5COC2H4P+NC3H7CHO    1.0E16 0.0 3.9E4
C11KET1-3=>OH+CH2CHO+NC8H17CHO    1.0E16 0.0 3.9E4
C10KET1-3=>OH+CH2CHO+NC7H15CHO    1.0E16 0.0 3.9E4
C10KET5-4=>OH+NC3H7CHO+NC5H11CO    1.0E16 0.0 3.9E4
C10KET5-6=>OH+NC4H9CO+NC4H9CHO    1.0E16 0.0 3.9E4
!
C9KET1-2=>OH+HCO+NC7H15CHO    1.0E16 0.0 3.9E4
C9KET1-3=>OH+CH2CHO+NC6H13CHO    1.0E16 0.0 3.9E4
C9KET4-3=>OH+C2H5CHO+NC5H11CO    1.0E16 0.0 3.9E4
C9KET4-5=>OH+NC3H7CO+NC4H9CHO    1.0E16 0.0 3.9E4
C9KET5-4=>OH+NC3H7CHO+NC4H9CO    1.0E16 0.0 3.9E4
!
C8KET1-2=>OH+HCO+NC6H13CHO    1.0E16 0.0 3.9E4
C8KET1-3=>OH+CH2CHO+NC5H11CHO    1.0E16 0.0 3.9E4
C8KET3-4=>OH+C2H5CO+NC4H9CHO    1.0E16 0.0 3.9E4
C8KET4-3=>OH+C2H5CHO+NC4H9CO    1.0E16 0.0 3.9E4
C8KET4-5=>OH+NC3H7CO+NC3H7CHO    1.0E16 0.0 3.9E4
C8KET4-6=>OH+NC3H7COCH2+C2H5CHO    1.0E16 0.0 3.9E4
!
!
!
!
!     CLASS 29   REACTIONS OF CYCLIC ETHERS
!
C12O1-2+OH=>C2H3CHO+C9H19-1+H2O    2.5E12 0.0 0.0E0
C12O1-2+OH=>CH2CO+C10H21-1+H2O    2.5E12 0.0 0.0E0
C12O1-3+OH=>C11H22-1+HCO+H2O    2.5E12 0.0 0.0E0
C12O1-3+OH=>C2H4+NC9H19CO+H2O    2.5E12 0.0 0.0E0
C12O1-4+OH=>CH2CHO+C10H20-1+H2O    2.5E12 0.0 0.0E0
C12O1-4+OH=>C2H4+C8H17COCH2+H2O    2.5E12 0.0 0.0E0
C12O2-4+OH=>CH3CO+C10H20-1+H2O    2.5E12 0.0 0.0E0
C12O2-4+OH=>C3H6+NC8H17CO+H2O    2.5E12 0.0 0.0E0
C12O2-5+OH=>CH3COCH2+C9H18-1+H2O    2.5E12 0.0 0.0E0
C12O2-5+OH=>C3H6+C7H15COCH2+H2O    2.5E12 0.0 0.0E0
C12O3-4+OH=>C2H5CHCO+C8H17-1+H2O    2.5E12 0.0 0.0E0
C12O3-5+OH=>C2H5CO+C9H18-1+H2O    2.5E12 0.0 0.0E0
C12O3-5+OH=>C4H8-1+NC7H15CO+H2O    2.5E12 0.0 0.0E0
C12O3-6+OH=>C2H5COCH2+C8H16-1+H2O    2.5E12 0.0 0.0E0
C12O3-6+OH=>C4H8-1+C6H13COCH2+H2O    2.5E12 0.0 0.0E0
C12O4-6+OH=>NC3H7CO+C8H16-1+H2O    2.5E12 0.0 0.0E0
C12O4-6+OH=>C5H10-1+NC6H13CO+H2O    2.5E12 0.0 0.0E0
C12O4-7+OH=>NC3H7COCH2+C7H14-1+H2O    2.5E12 0.0 0.0E0
C12O4-7+OH=>C5H10-1+C5H11COCH2+H2O    2.5E12 0.0 0.0E0
C12O5-8+OH=>NC4H9COCH2+C6H12-1+H2O    2.5E12 0.0 0.0E0
!
C12O1-2+HO2=>C2H3CHO+C9H19-1+H2O2    5.0E12 0.0 1.77E4
C12O1-2+HO2=>CH2CO+C10H21-1+H2O2    5.0E12 0.0 1.77E4
C12O1-3+HO2=>C11H22-1+HCO+H2O2    5.0E12 0.0 1.77E4
C12O1-3+HO2=>C2H4+NC9H19CO+H2O2    5.0E12 0.0 1.77E4
C12O1-4+HO2=>CH2CHO+C10H20-1+H2O2    5.0E12 0.0 1.77E4
C12O1-4+HO2=>C2H4+C8H17COCH2+H2O2    5.0E12 0.0 1.77E4
C12O2-4+HO2=>CH3CO+C10H20-1+H2O2    5.0E12 0.0 1.77E4
C12O2-4+HO2=>C3H6+NC8H17CO+H2O2    5.0E12 0.0 1.77E4
C12O2-5+HO2=>CH3COCH2+C9H18-1+H2O2    5.0E12 0.0 1.77E4
C12O2-5+HO2=>C3H6+C7H15COCH2+H2O2    5.0E12 0.0 1.77E4
C12O3-4+HO2=>C2H5CHCO+C8H17-1+H2O2    5.0E12 0.0 1.77E4
C12O3-5+HO2=>C2H5CO+C9H18-1+H2O2    5.0E12 0.0 1.77E4
C12O3-5+HO2=>C4H8-1+NC7H15CO+H2O2    5.0E12 0.0 1.77E4
C12O3-6+HO2=>C2H5COCH2+C8H16-1+H2O2    5.0E12 0.0 1.77E4
C12O3-6+HO2=>C4H8-1+C6H13COCH2+H2O2    5.0E12 0.0 1.77E4
C12O4-6+HO2=>NC3H7CO+C8H16-1+H2O2    5.0E12 0.0 1.77E4
C12O4-6+HO2=>C5H10-1+NC6H13CO+H2O2    5.0E12 0.0 1.77E4
C12O4-7+HO2=>NC3H7COCH2+C7H14-1+H2O2    5.0E12 0.0 1.77E4
C12O4-7+HO2=>C5H10-1+C5H11COCH2+H2O2    5.0E12 0.0 1.77E4
C12O5-8+HO2=>NC4H9COCH2+C6H12-1+H2O2    5.0E12 0.0 1.77E4
C11O1-3+OH=>C10H20-1+HCO+H2O    2.5E12 0.0 0.0E0
C11O1-3+OH=>C2H4+NC8H17CO+H2O    2.5E12 0.0 0.0E0
C11O2-4+OH=>CH3CO+C9H18-1+H2O    2.5E12 0.0 0.0E0
C11O2-4+OH=>C3H6+NC7H15CO+H2O    2.5E12 0.0 0.0E0
C11O3-5+OH=>C2H5CO+C8H16-1+H2O    2.5E12 0.0 0.0E0
C11O3-5+OH=>C4H8-1+NC6H13CO+H2O    2.5E12 0.0 0.0E0
C11O1-3+HO2=>C10H20-1+HCO+H2O2    5.0E12 0.0 1.77E4
C11O1-3+HO2=>C2H4+NC8H17CO+H2O2    5.0E12 0.0 1.77E4
C11O2-4+HO2=>CH3CO+C9H18-1+H2O2    5.0E12 0.0 1.77E4
C11O2-4+HO2=>C3H6+NC7H15CO+H2O2    5.0E12 0.0 1.77E4
C11O3-5+HO2=>C2H5CO+C8H16-1+H2O2    5.0E12 0.0 1.77E4
C11O3-5+HO2=>C4H8-1+NC6H13CO+H2O2    5.0E12 0.0 1.77E4
C10O1-3+OH=>C9H18-1+HCO+H2O    2.5E12 0.0 0.0E0
C10O1-3+OH=>C2H4+NC7H15CO+H2O    2.5E12 0.0 0.0E0
C10O1-4+OH=>CH2CHO+C8H16-1+H2O    2.5E12 0.0 0.0E0
C10O1-4+OH=>C2H4+C6H13COCH2+H2O    2.5E12 0.0 0.0E0
C10O2-4+OH=>CH3CO+C8H16-1+H2O    2.5E12 0.0 0.0E0
C10O2-4+OH=>C3H6+NC6H13CO+H2O    2.5E12 0.0 0.0E0
C10O1-3+HO2=>C9H18-1+HCO+H2O2    5.0E12 0.0 1.77E4
C10O1-3+HO2=>C2H4+NC7H15CO+H2O2    5.0E12 0.0 1.77E4
C10O1-4+HO2=>CH2CHO+C8H16-1+H2O2    5.0E12 0.0 1.77E4
C10O1-4+HO2=>C2H4+C6H13COCH2+H2O2    5.0E12 0.0 1.77E4
C10O2-4+HO2=>CH3CO+C8H16-1+H2O2    5.0E12 0.0 1.77E4
C10O2-4+HO2=>C3H6+NC6H13CO+H2O2    5.0E12 0.0 1.77E4
C9O1-3+OH=>C8H16-1+HCO+H2O    2.5E12 0.0 0.0E0
C9O1-3+OH=>C2H4+NC6H13CO+H2O    2.5E12 0.0 0.0E0
C9O3-5+OH=>C2H5CO+C6H12-1+H2O    2.5E12 0.0 0.0E0
C9O3-5+OH=>C4H8-1+NC4H9CO+H2O    2.5E12 0.0 0.0E0
C9O4-6+OH=>NC3H7CO+C5H10-1+H2O    2.5E12 0.0 0.0E0
C9O1-3+HO2=>C8H16-1+HCO+H2O2    5.0E12 0.0 1.77E4
C9O1-3+HO2=>C2H4+NC6H13CO+H2O2    5.0E12 0.0 1.77E4
C9O3-5+HO2=>C2H5CO+C6H12-1+H2O2    5.0E12 0.0 1.77E4
C9O3-5+HO2=>C4H8-1+NC4H9CO+H2O2    5.0E12 0.0 1.77E4
C9O4-6+HO2=>NC3H7CO+C5H10-1+H2O2    5.0E12 0.0 1.77E4
C8O1-3+OH=>C7H14-1+HCO+H2O    2.5E12 0.0 0.0E0
C8O1-3+OH=>C2H4+NC5H11CO+H2O    2.5E12 0.0 0.0E0
C8O1-4+OH=>CH2CHO+C6H12-1+H2O    2.5E12 0.0 0.0E0
C8O1-4+OH=>C2H4+NC4H9COCH2+H2O    2.5E12 0.0 0.0E0
C8O2-4+OH=>CH3CO+C6H12-1+H2O    2.5E12 0.0 0.0E0
C8O2-4+OH=>C3H6+NC4H9CO+H2O    2.5E12 0.0 0.0E0
C8O3-5+OH=>C2H5CO+C5H10-1+H2O    2.5E12 0.0 0.0E0
C8O3-5+OH=>C4H8-1+NC3H7CO+H2O    2.5E12 0.0 0.0E0
C8O1-3+HO2=>C7H14-1+HCO+H2O2    5.0E12 0.0 1.77E4
C8O1-3+HO2=>C2H4+NC5H11CO+H2O2    5.0E12 0.0 1.77E4
C8O1-4+HO2=>CH2CHO+C6H12-1+H2O2    5.0E12 0.0 1.77E4
C8O1-4+HO2=>C2H4+NC4H9COCH2+H2O2    5.0E12 0.0 1.77E4
C8O2-4+HO2=>CH3CO+C6H12-1+H2O2    5.0E12 0.0 1.77E4
C8O2-4+HO2=>C3H6+NC4H9CO+H2O2    5.0E12 0.0 1.77E4
C8O3-5+HO2=>C2H5CO+C5H10-1+H2O2    5.0E12 0.0 1.77E4
C8O3-5+HO2=>C4H8-1+NC3H7CO+H2O2    5.0E12 0.0 1.77E4
C9H19COCH2=C9H19-1+CH2CO    2.0E13 0.0 3.1E4
    REV/2.0E11 0.0E0 7.35E3/
C8H17COCH2=C8H17-1+CH2CO    2.0E13 0.0 3.1E4
    REV/2.0E11 0.0E0 7.35E3/
C7H15COCH2=C7H15-1+CH2CO    2.0E13 0.0 3.1E4
    REV/2.0E11 0.0E0 7.35E3/
C6H13COCH2=C6H13-1+CH2CO    2.0E13 0.0 3.1E4
    REV/2.0E11 0.0E0 7.35E3/
C5H11COCH2=C5H11-1+CH2CO    2.0E13 0.0 3.1E4
    REV/2.0E11 0.0E0 7.35E3/
C7COC2H4P=NC7H15CO+C2H4    5.0E17 -1.5 2.6E4
    REV/2.5E11 0.0E0 7.8E3/
C6COC2H4P=NC6H13CO+C2H4    5.0E17 -1.5 2.6E4
    REV/2.5E11 0.0E0 7.8E3/
C5COC2H4P=NC5H11CO+C2H4    5.0E17 -1.5 2.6E4
    REV/2.5E11 0.0E0 7.8E3/
C4COC2H4P=NC4H9CO+C2H4    5.0E17 -1.5 2.6E4
    REV/2.5E11 0.0E0 7.8E3/
!
!
!
!
!!!!!!!!!!C8-C20 2-METHYLALKANE MECHANISM WITH LOW TEMPERATURE AND HIGH TEMP CHEMISTRY!!!!!!!!!
!
!
!
!
!
!       2-METHYLHEXANE
!
!
!
!
!
!
!
!
!
!       CLASS 1  UNIMOLECULAR FUEL DECOMPOSITION
!
C7H15-2A+H=C7H16-2    1.0E14 0.0 0.0E0
C7H15-2B+H=C7H16-2    1.0E14 0.0 0.0E0
C7H15-2D+H=C7H16-2    1.0E14 0.0 0.0E0
C7H15-2E+H=C7H16-2    1.0E14 0.0 0.0E0
!
CH3+C6H13-2=C7H16-2    1.0E13 0.0 0.0E0
IC3H7+PC4H9=C7H16-2    8.0E12 0.0 0.0E0
IC4H9+NC3H7=C7H16-2    8.0E12 0.0 0.0E0
DC5H11+C2H5=C7H16-2    8.0E12 0.0 0.0E0
EC6H13+CH3=C7H16-2    1.0E13 0.0 0.0E0
!
!
!
!       2-METHYLHEPTANE
!
!
!
!
!
!
!
!
!
!       CLASS 1  UNIMOLECULAR FUEL DECOMPOSITION
!
C8H17-2A+H=C8H18-2    1.0E14 0.0 0.0E0
C8H17-2C+H=C8H18-2    1.0E14 0.0 0.0E0
C8H17-2D+H=C8H18-2    1.0E14 0.0 0.0E0
C8H17-2E+H=C8H18-2    1.0E14 0.0 0.0E0
C8H17-2F+H=C8H18-2    1.0E14 0.0 0.0E0
C8H17-2G+H=C8H18-2    1.0E14 0.0 0.0E0
!
CH3+C7H15-2=C8H18-2    1.0E13 0.0 0.0E0
IC3H7+C5H11-1=C8H18-2    8.0E12 0.0 0.0E0
IC4H9+PC4H9=C8H18-2    8.0E12 0.0 0.0E0
DC5H11+NC3H7=C8H18-2    8.0E12 0.0 0.0E0
EC6H13+C2H5=C8H18-2    8.0E12 0.0 0.0E0
!
!
!
!       2-METHYLNONANE
!
!
!
!       CLASS 1  UNIMOLECULAR FUEL DECOMPOSITION
!
C10H21-2A+H=C10H22-2    1.0E14 0.0 0.0E0
C10H21-2D+H=C10H22-2    1.0E14 0.0 0.0E0
C10H21-2F+H=C10H22-2    1.0E14 0.0 0.0E0
C10H21-2I+H=C10H22-2    1.0E14 0.0 0.0E0
!
CH3+C9H19-2=C10H22-2    1.0E13 0.0 0.0E0
IC3H7+C7H15-1=C10H22-2    8.0E12 0.0 0.0E0
IC4H9+C6H13-1=C10H22-2    8.0E12 0.0 0.0E0
DC5H11+C5H11-1=C10H22-2    8.0E12 0.0 0.0E0
EC6H13+PC4H9=C10H22-2    8.0E12 0.0 0.0E0
C8H17-2G+C2H5=C10H22-2    8.0E12 0.0 0.0E0
!
!
!
!
!
!
!       2-METHYLDECANE
!
!
!
!       CLASS 1  UNIMOLECULAR FUEL DECOMPOSITION
!
C11H23-2A+H=C11H24-2    1.0E14 0.0 0.0E0
C11H23-2F+H=C11H24-2    1.0E14 0.0 0.0E0
!
CH3+C10H21-2=C11H24-2    1.0E13 0.0 0.0E0
IC3H7+C8H17-1=C11H24-2    8.0E12 0.0 0.0E0
IC4H9+C7H15-1=C11H24-2    8.0E12 0.0 0.0E0
DC5H11+C6H13-1=C11H24-2    8.0E12 0.0 0.0E0
EC6H13+C5H11-1=C11H24-2    8.0E12 0.0 0.0E0
C8H17-2G+NC3H7=C11H24-2    8.0E12 0.0 0.0E0
C10H21-2I+CH3=C11H24-2    1.0E13 0.0 0.0E0
!
!
!
!
!             !
!
!
!       2-METHYLHEXANE
!
!
!
!
!
!       CLASS 2     H ATOM ABSTRACTION FROM FUEL
C7H16-2+H=C7H15-2A+H2    1.33E6 2.54 6.756E3
C7H16-2+H=C7H15-2B+H2    6.02E5 2.4 2.583E3
C7H16-2+H=C7H15-2D+H2    1.3E6 2.4 4.471E3
C7H16-2+H=C7H15-2E+H2    1.3E6 2.4 4.471E3
!
!
C7H16-2+O=C7H15-2A+OH    1.96E6 2.43 4.75E3
C7H16-2+O=C7H15-2B+OH    3.83E5 2.41 1.14E3
C7H16-2+O=C7H15-2D+OH    5.52E5 2.45 2.83E3
C7H16-2+O=C7H15-2E+OH    5.52E5 2.45 2.83E3
!
!
C7H16-2+OH=C7H15-2A+H2O    1.056E10 0.97 1.59E3
C7H16-2+OH=C7H15-2B+H2O    5.73E10 0.51 6.3E1
C7H16-2+OH=C7H15-2D+H2O    4.68E7 1.61 -3.5E1
C7H16-2+OH=C7H15-2E+H2O    4.68E7 1.61 -3.5E1
!
!
C7H16-2+CH3=C7H15-2A+CH4    9.04E-1 3.65 7.154E3
C7H16-2+CH3=C7H15-2B+CH4    6.01E-10 6.36 8.93E2
C7H16-2+CH3=C7H15-2D+CH4    1.51E0 3.46 5.481E3
C7H16-2+CH3=C7H15-2E+CH4    1.51E0 3.46 5.481E3
!
!
C7H16-2+HO2=C7H15-2A+H2O2    4.08E1 3.59 1.716E4
C7H16-2+HO2=C7H15-2B+H2O2    6.5E2 3.01 1.209E4
C7H16-2+HO2=C7H15-2D+H2O2    6.32E1 3.37 1.372E4
C7H16-2+HO2=C7H15-2E+H2O2    6.32E1 3.37 1.372E4
!
!
C7H16-2+CH3O=C7H15-2A+CH3OH    4.338E11 0.0 6.548E3
C7H16-2+CH3O=C7H15-2B+CH3OH    2.29E10 0.0 2.873E3
C7H16-2+CH3O=C7H15-2D+CH3OH    1.45E11 0.0 4.571E3
C7H16-2+CH3O=C7H15-2E+CH3OH    1.45E11 0.0 4.571E3
!
!
C7H16-2+O2=C7H15-2A+HO2    6.0E13 0.0 5.229E4
C7H16-2+O2=C7H15-2B+HO2    1.0E13 0.0 4.82E4
C7H16-2+O2=C7H15-2D+HO2    2.0E13 0.0 4.964E4
C7H16-2+O2=C7H15-2E+HO2    2.0E13 0.0 4.964E4
!
!
C7H16-2+C2H5=C7H15-2A+C2H6    1.0E11 0.0 1.34E4
C7H16-2+C2H5=C7H15-2B+C2H6    1.0E11 0.0 7.9E3
C7H16-2+C2H5=C7H15-2D+C2H6    5.0E10 0.0 1.04E4
C7H16-2+C2H5=C7H15-2E+C2H6    5.0E10 0.0 1.04E4
!
!
C7H16-2+C2H3=C7H15-2A+C2H4    1.0E12 0.0 1.8E4
C7H16-2+C2H3=C7H15-2B+C2H4    2.0E11 0.0 1.43E4
C7H16-2+C2H3=C7H15-2D+C2H4    4.0E11 0.0 1.68E4
C7H16-2+C2H3=C7H15-2E+C2H4    4.0E11 0.0 1.68E4
!
!
C7H16-2+CH3O2=C7H15-2A+CH3O2H    1.386E0 3.97 1.828E4
C7H16-2+CH3O2=C7H15-2B+CH3O2H    2.06E2 3.12 1.319E4
C7H16-2+CH3O2=C7H15-2D+CH3O2H    1.0185E1 3.58 1.481E4
C7H16-2+CH3O2=C7H15-2E+CH3O2H    1.0185E1 3.58 1.481E4
!
!
C7H16-2+C7H15-2A=C7H15-2B+C7H16-2    2.5E10 0.0 7.9E3
    REV/1.5E11 0.0E0 1.23E4/
C7H16-2+C7H15-2A=C7H15-2D+C7H16-2    5.0E10 0.0 1.04E4
    REV/1.5E11 0.0E0 1.23E4/
C7H16-2+C7H15-2A=C7H15-2E+C7H16-2    5.0E10 0.0 1.04E4
    REV/1.5E11 0.0E0 1.23E4/
C7H16-2+C7H15-2B=C7H15-2D+C7H16-2    5.0E10 0.0 1.04E4
    REV/2.5E10 0.0E0 7.9E3/
C7H16-2+C7H15-2B=C7H15-2E+C7H16-2    5.0E10 0.0 1.04E4
    REV/2.5E10 0.0E0 7.9E3/
!
!
C7H16-2+C7H15-2D=C7H15-2E+C7H16-2    5.0E10 0.0 1.04E4
    REV/5.0E10 0.0E0 1.04E4/
!
!
!
!
!
!
!
!
!
!       2-METHYLHEPTANE
!
!
!
!
!
!       CLASS 2     H ATOM ABSTRACTION FROM FUEL
C8H18-2+H=C8H17-2A+H2    1.33E6 2.54 6.756E3
C8H18-2+H=C8H17-2C+H2    1.3E6 2.4 4.471E3
C8H18-2+H=C8H17-2D+H2    1.3E6 2.4 4.471E3
C8H18-2+H=C8H17-2E+H2    1.3E6 2.4 4.471E3
C8H18-2+H=C8H17-2F+H2    1.3E6 2.4 4.471E3
C8H18-2+H=C8H17-2G+H2    6.66E5 2.54 6.756E3
!
!
C8H18-2+O=C8H17-2A+OH    1.96E6 2.43 4.75E3
C8H18-2+O=C8H17-2C+OH    5.52E5 2.45 2.83E3
C8H18-2+O=C8H17-2D+OH    5.52E5 2.45 2.83E3
C8H18-2+O=C8H17-2E+OH    5.52E5 2.45 2.83E3
C8H18-2+O=C8H17-2F+OH    5.52E5 2.45 2.83E3
C8H18-2+O=C8H17-2G+OH    9.81E5 2.43 4.75E3
!
!
C8H18-2+OH=C8H17-2A+H2O    1.056E10 0.97 1.59E3
C8H18-2+OH=C8H17-2C+H2O    4.68E7 1.61 -3.5E1
C8H18-2+OH=C8H17-2D+H2O    4.68E7 1.61 -3.5E1
C8H18-2+OH=C8H17-2E+H2O    4.68E7 1.61 -3.5E1
C8H18-2+OH=C8H17-2F+H2O    4.68E7 1.61 -3.5E1
C8H18-2+OH=C8H17-2G+H2O    5.28E9 0.97 1.59E3
!
!
C8H18-2+CH3=C8H17-2A+CH4    9.04E-1 3.65 7.154E3
C8H18-2+CH3=C8H17-2C+CH4    1.51E0 3.46 5.481E3
C8H18-2+CH3=C8H17-2D+CH4    1.51E0 3.46 5.481E3
C8H18-2+CH3=C8H17-2E+CH4    1.51E0 3.46 5.481E3
C8H18-2+CH3=C8H17-2F+CH4    1.51E0 3.46 5.481E3
C8H18-2+CH3=C8H17-2G+CH4    4.52E-1 3.65 7.154E3
!
!
C8H18-2+HO2=C8H17-2A+H2O2    4.08E1 3.59 1.716E4
C8H18-2+HO2=C8H17-2C+H2O2    6.32E1 3.37 1.372E4
C8H18-2+HO2=C8H17-2D+H2O2    6.32E1 3.37 1.372E4
C8H18-2+HO2=C8H17-2E+H2O2    6.32E1 3.37 1.372E4
C8H18-2+HO2=C8H17-2F+H2O2    6.32E1 3.37 1.372E4
C8H18-2+HO2=C8H17-2G+H2O2    2.04E1 3.59 1.716E4
!
!
C8H18-2+CH3O=C8H17-2A+CH3OH    4.338E11 0.0 6.548E3
C8H18-2+CH3O=C8H17-2C+CH3OH    1.45E11 0.0 4.571E3
C8H18-2+CH3O=C8H17-2D+CH3OH    1.45E11 0.0 4.571E3
C8H18-2+CH3O=C8H17-2E+CH3OH    1.45E11 0.0 4.571E3
C8H18-2+CH3O=C8H17-2F+CH3OH    1.45E11 0.0 4.571E3
C8H18-2+CH3O=C8H17-2G+CH3OH    2.169E11 0.0 6.548E3
!
!
C8H18-2+O2=C8H17-2A+HO2    6.0E13 0.0 5.229E4
C8H18-2+O2=C8H17-2C+HO2    2.0E13 0.0 4.964E4
C8H18-2+O2=C8H17-2D+HO2    2.0E13 0.0 4.964E4
C8H18-2+O2=C8H17-2E+HO2    2.0E13 0.0 4.964E4
C8H18-2+O2=C8H17-2F+HO2    2.0E13 0.0 4.964E4
C8H18-2+O2=C8H17-2G+HO2    3.0E13 0.0 5.28E4
!
!
C8H18-2+C2H5=C8H17-2A+C2H6    1.0E11 0.0 1.34E4
C8H18-2+C2H5=C8H17-2C+C2H6    5.0E10 0.0 1.04E4
C8H18-2+C2H5=C8H17-2D+C2H6    5.0E10 0.0 1.04E4
C8H18-2+C2H5=C8H17-2E+C2H6    5.0E10 0.0 1.04E4
C8H18-2+C2H5=C8H17-2F+C2H6    5.0E10 0.0 1.04E4
C8H18-2+C2H5=C8H17-2G+C2H6    5.0E10 0.0 1.34E4
!
!
C8H18-2+C2H3=C8H17-2A+C2H4    1.0E12 0.0 1.8E4
C8H18-2+C2H3=C8H17-2C+C2H4    4.0E11 0.0 1.68E4
C8H18-2+C2H3=C8H17-2D+C2H4    4.0E11 0.0 1.68E4
C8H18-2+C2H3=C8H17-2E+C2H4    4.0E11 0.0 1.68E4
C8H18-2+C2H3=C8H17-2F+C2H4    4.0E11 0.0 1.68E4
C8H18-2+C2H3=C8H17-2G+C2H4    5.0E11 0.0 1.8E4
!
!
C8H18-2+CH3O2=C8H17-2A+CH3O2H    1.386E0 3.97 1.828E4
C8H18-2+CH3O2=C8H17-2C+CH3O2H    1.0185E1 3.58 1.481E4
C8H18-2+CH3O2=C8H17-2D+CH3O2H    1.0185E1 3.58 1.481E4
C8H18-2+CH3O2=C8H17-2E+CH3O2H    1.0185E1 3.58 1.481E4
C8H18-2+CH3O2=C8H17-2F+CH3O2H    1.0185E1 3.58 1.481E4
C8H18-2+CH3O2=C8H17-2G+CH3O2H    6.93E-1 3.97 1.828E4
C8H18-2+C8H17-2A=C8H17-2C+C8H18-2    5.0E10 0.0 1.04E4
    REV/1.5E11 0.0E0 1.23E4/
C8H18-2+C8H17-2A=C8H17-2D+C8H18-2    5.0E10 0.0 1.04E4
    REV/1.5E11 0.0E0 1.23E4/
C8H18-2+C8H17-2A=C8H17-2E+C8H18-2    5.0E10 0.0 1.04E4
    REV/1.5E11 0.0E0 1.23E4/
C8H18-2+C8H17-2A=C8H17-2F+C8H18-2    5.0E10 0.0 1.23E4
    REV/1.5E11 0.0E0 1.04E4/
C8H18-2+C8H17-2A=C8H17-2G+C8H18-2    7.5E10 0.0 1.23E4
    REV/1.5E11 0.0E0 1.23E4/
!
!
C8H18-2+C8H17-2C=C8H17-2D+C8H18-2    5.0E10 0.0 1.04E4
    REV/5.0E10 0.0E0 1.04E4/
C8H18-2+C8H17-2C=C8H17-2E+C8H18-2    5.0E10 0.0 1.04E4
    REV/5.0E10 0.0E0 1.04E4/
C8H18-2+C8H17-2C=C8H17-2F+C8H18-2    5.0E10 0.0 1.04E4
    REV/5.0E10 0.0E0 1.04E4/
C8H18-2+C8H17-2C=C8H17-2G+C8H18-2    7.5E10 0.0 1.23E4
    REV/5.0E10 0.0E0 1.04E4/
!
!
C8H18-2+C8H17-2D=C8H17-2E+C8H18-2    5.0E10 0.0 1.04E4
    REV/5.0E10 0.0E0 1.04E4/
C8H18-2+C8H17-2D=C8H17-2F+C8H18-2    5.0E10 0.0 1.04E4
    REV/5.0E10 0.0E0 1.04E4/
C8H18-2+C8H17-2D=C8H17-2G+C8H18-2    7.5E10 0.0 1.23E4
    REV/5.0E10 0.0E0 1.04E4/
!
!
C8H18-2+C8H17-2E=C8H17-2F+C8H18-2    5.0E10 0.0 1.04E4
    REV/5.0E10 0.0E0 1.04E4/
C8H18-2+C8H17-2E=C8H17-2G+C8H18-2    7.5E10 0.0 1.23E4
    REV/5.0E10 0.0E0 1.04E4/
!
C8H18-2+C8H17-2F=C8H17-2G+C8H18-2    7.5E10 0.0 1.23E4
    REV/5.0E10 0.0E0 1.04E4/
!
!
!
!
!
!
!
!
!       2-METHYLNONANE
!
!
!
!
!
!       CLASS 2     H ATOM ABSTRACTION FROM FUEL
C10H22-2+H=C10H21-2A+H2    1.33E6 2.54 6.756E3
C10H22-2+H=C10H21-2D+H2    1.3E6 2.4 4.471E3
C10H22-2+H=C10H21-2F+H2    1.3E6 2.4 4.471E3
C10H22-2+H=C10H21-2I+H2    6.66E5 2.54 6.756E3
!
!
C10H22-2+O=C10H21-2A+OH    1.96E6 2.43 4.75E3
C10H22-2+O=C10H21-2D+OH    5.52E5 2.45 2.83E3
C10H22-2+O=C10H21-2F+OH    5.52E5 2.45 2.83E3
C10H22-2+O=C10H21-2I+OH    9.81E5 2.43 4.75E3
!
!
C10H22-2+OH=C10H21-2A+H2O    1.056E10 0.97 1.59E3
C10H22-2+OH=C10H21-2D+H2O    4.68E7 1.61 -3.5E1
C10H22-2+OH=C10H21-2F+H2O    4.68E7 1.61 -3.5E1
C10H22-2+OH=C10H21-2I+H2O    5.28E9 0.97 1.59E3
!
!
C10H22-2+CH3=C10H21-2A+CH4    9.04E-1 3.65 7.154E3
C10H22-2+CH3=C10H21-2D+CH4    1.51E0 3.46 5.481E3
C10H22-2+CH3=C10H21-2F+CH4    1.51E0 3.46 5.481E3
C10H22-2+CH3=C10H21-2I+CH4    4.52E-1 3.65 7.154E3
!
!
C10H22-2+HO2=C10H21-2A+H2O2    4.08E1 3.59 1.716E4
C10H22-2+HO2=C10H21-2D+H2O2    6.32E1 3.37 1.372E4
C10H22-2+HO2=C10H21-2F+H2O2    6.32E1 3.37 1.372E4
C10H22-2+HO2=C10H21-2I+H2O2    2.04E1 3.59 1.716E4
!
!
C10H22-2+CH3O=C10H21-2A+CH3OH    4.338E11 0.0 6.548E3
C10H22-2+CH3O=C10H21-2D+CH3OH    1.45E11 0.0 4.571E3
C10H22-2+CH3O=C10H21-2F+CH3OH    1.45E11 0.0 4.571E3
C10H22-2+CH3O=C10H21-2I+CH3OH    2.169E11 0.0 6.548E3
!
!
C10H22-2+O2=C10H21-2A+HO2    6.0E13 0.0 5.229E4
C10H22-2+O2=C10H21-2D+HO2    2.0E13 0.0 4.964E4
C10H22-2+O2=C10H21-2F+HO2    2.0E13 0.0 4.964E4
C10H22-2+O2=C10H21-2I+HO2    3.0E13 0.0 5.28E4
!
!
C10H22-2+C2H5=C10H21-2A+C2H6    1.0E11 0.0 1.34E4
C10H22-2+C2H5=C10H21-2D+C2H6    5.0E10 0.0 1.04E4
C10H22-2+C2H5=C10H21-2F+C2H6    5.0E10 0.0 1.04E4
C10H22-2+C2H5=C10H21-2I+C2H6    5.0E10 0.0 1.34E4
!
!
C10H22-2+C2H3=C10H21-2A+C2H4    1.0E12 0.0 1.8E4
C10H22-2+C2H3=C10H21-2D+C2H4    4.0E11 0.0 1.68E4
C10H22-2+C2H3=C10H21-2F+C2H4    4.0E11 0.0 1.68E4
C10H22-2+C2H3=C10H21-2I+C2H4    5.0E11 0.0 1.8E4
!
!
C10H22-2+CH3O2=C10H21-2A+CH3O2H    1.386E0 3.97 1.828E4
C10H22-2+CH3O2=C10H21-2D+CH3O2H    1.0185E1 3.58 1.481E4
C10H22-2+CH3O2=C10H21-2F+CH3O2H    1.0185E1 3.58 1.481E4
C10H22-2+CH3O2=C10H21-2I+CH3O2H    6.93E-1 3.97 1.828E4
C10H22-2+C10H21-2A=C10H21-2D+C10H22-2    5.0E10 0.0 1.04E4
    REV/1.5E11 0.0E0 1.23E4/
C10H22-2+C10H21-2A=C10H21-2F+C10H22-2    5.0E10 0.0 1.23E4
    REV/1.5E11 0.0E0 1.04E4/
C10H22-2+C10H21-2A=C10H21-2I+C10H22-2    7.5E10 0.0 1.23E4
    REV/1.5E11 0.0E0 1.23E4/
C10H22-2+C10H21-2D=C10H21-2F+C10H22-2    5.0E10 0.0 1.04E4
    REV/5.0E10 0.0E0 1.04E4/
C10H22-2+C10H21-2D=C10H21-2I+C10H22-2    7.5E10 0.0 1.23E4
    REV/5.0E10 0.0E0 1.04E4/
C10H22-2+C10H21-2F=C10H21-2I+C10H22-2    7.5E10 0.0 1.23E4
    REV/5.0E10 0.0E0 1.04E4/
!
!
!
!
!
!
!
!
!       2-METHYLDECANE
!
!
!
!
!
!       CLASS 2     H ATOM ABSTRACTION FROM FUEL
C11H24-2+H=C11H23-2A+H2    1.33E6 2.54 6.756E3
C11H24-2+H=C11H23-2F+H2    1.3E6 2.4 4.471E3
!
!
C11H24-2+O=C11H23-2A+OH    1.96E6 2.43 4.75E3
C11H24-2+O=C11H23-2F+OH    5.52E5 2.45 2.83E3
!
!
C11H24-2+OH=C11H23-2A+H2O    1.056E10 0.97 1.59E3
C11H24-2+OH=C11H23-2F+H2O    4.68E7 1.61 -3.5E1
!
!
C11H24-2+CH3=C11H23-2A+CH4    9.04E-1 3.65 7.154E3
C11H24-2+CH3=C11H23-2F+CH4    1.51E0 3.46 5.481E3
!
!
C11H24-2+HO2=C11H23-2A+H2O2    4.08E1 3.59 1.716E4
C11H24-2+HO2=C11H23-2F+H2O2    6.32E1 3.37 1.372E4
!
!
C11H24-2+CH3O=C11H23-2A+CH3OH    4.338E11 0.0 6.548E3
C11H24-2+CH3O=C11H23-2F+CH3OH    1.45E11 0.0 4.571E3
!
!
C11H24-2+O2=C11H23-2A+HO2    6.0E13 0.0 5.229E4
C11H24-2+O2=C11H23-2F+HO2    2.0E13 0.0 4.964E4
!
!
C11H24-2+C2H5=C11H23-2A+C2H6    1.0E11 0.0 1.34E4
C11H24-2+C2H5=C11H23-2F+C2H6    5.0E10 0.0 1.04E4
!
!
C11H24-2+C2H3=C11H23-2A+C2H4    1.0E12 0.0 1.8E4
C11H24-2+C2H3=C11H23-2F+C2H4    4.0E11 0.0 1.68E4
!
!
C11H24-2+CH3O2=C11H23-2A+CH3O2H    1.386E0 3.97 1.828E4
C11H24-2+CH3O2=C11H23-2F+CH3O2H    1.0185E1 3.58 1.481E4
C11H24-2+C11H23-2A=C11H23-2F+C11H24-2    5.0E10 0.0 1.23E4
    REV/1.5E11 0.0E0 1.04E4/
!
!
!
!
!
!
!
!
!
!
!
!
!
!       2-METHYLHEXANE
!
!
!
!
!
!
!       CLASS 3     ALKYL RADICAL DECOMPOSITION
!
!
C7H15-2A=PC4H9+C3H6    3.68E15 -0.56 3.1359E4
C7H15-2A=CH3+C6H12-1    9.55E14 -0.59 3.0592E4
H+C7H14-1-2=C7H15-2A    2.5E11 0.51 2.62E3
!
C7H15-2B=NC3H7+IC4H8    1.71E12 0.31 2.661E4
H+C7H14-1-2=C7H15-2B    4.24E11 0.51 1.23E3
!
C7H15-2D=IC3H7+C4H8-1    6.98E12 0.16 2.4963E4
C7H15-2D=CH3+DC6H12    9.55E14 -0.59 3.0592E4
!
C7H15-2E=IC4H9+C3H6    1.06E13 0.07 2.7125E4
!
!
!
!
!
!
!
!
!
!
!
!
!
!       2-METHYLHEPTANE
!
!
!
!
!
!
!       CLASS 3     ALKYL RADICAL DECOMPOSITION
!
!
C8H17-2A=C5H11-1+C3H6    3.68E15 -0.56 3.1359E4
C8H17-2A=CH3+C7H14-1    9.55E14 -0.59 3.0592E4
H+C8H16-1-2=C8H17-2A    2.5E11 0.51 2.62E3
!
C8H17-2C=NC3H7+CC5H10    3.08E13 0.03 2.8992E4
C8H17-2C=CH3+C7H14-2    1.77E13 0.11 3.0542E4
!
C8H17-2D=IC3H7+C5H10-1    6.98E12 0.16 2.4963E4
C8H17-2D=C2H5+DC6H12    3.08E13 0.03 2.8992E4
!
C8H17-2E=IC4H9+C4H8-1    6.98E12 0.16 2.4963E4
!
C8H17-2F=DC5H11+C3H6    1.06E13 0.07 2.7125E4
H+C8H16-6-2=C8H17-2F    2.5E11 0.51 2.62E3
!
!
C8H17-2G=EC6H13+C2H4    2.64E15 -0.55 3.1136E4
H+C8H16-6-2=C8H17-2G    2.5E11 0.51 2.62E3
!
!
!
!
!
!
!
!
!
!
!
!       2-METHYLNONANE
!
!
!
!
!
!
!       CLASS 3     ALKYL RADICAL DECOMPOSITION
!
!
!
C10H21-2A=C7H15-1+C3H6    3.68E15 -0.56 3.1359E4
C10H21-2A=CH3+C9H18-1    9.55E14 -0.59 3.0592E4
!
C10H21-2D=IC3H7+C7H14-1    6.98E12 0.16 2.4963E4
C10H21-2D=PC4H9+DC6H12    3.08E13 0.03 2.8992E4
!
C10H21-2F=DC5H11+C5H10-1    6.98E12 0.16 2.4963E4
C10H21-2F=C2H5+C8H16-6-2    3.08E13 0.03 2.8992E4
!
C10H21-2I=C8H17-2G+C2H4    2.64E15 -0.55 3.1136E4
!
!
!
!
!
!
!
!
!
!
!
!       2-METHYLDECANE
!
!
!
!
!
!
!       CLASS 3     ALKYL RADICAL DECOMPOSITION
!
!
C11H23-2A=C8H17-1+C3H6    3.68E15 -0.56 3.1359E4
C11H23-2A=CH3+C10H20-1    9.55E14 -0.59 3.0592E4
!
C11H23-2F=DC5H11+C6H12-1    6.98E12 0.16 2.4963E4
C11H23-2F=NC3H7+C8H16-6-2    3.08E13 0.03 2.8992E4
!
H+C11H22-5-2=C11H23-2F    2.5E11 0.51 2.62E3
!
!
!
!
!
!
!
!
!
!
!
!       2-METHYLDODECANE
!
!
!
!
!
!
!       CLASS 3     ALKYL RADICAL DECOMPOSITION
!
!
!
!
!      2-METHYLHEXANE
!
!
!
!
!
!
!       CLASS 4 ALKYL RADICAL ISOMERIZATION
!       INCLUDE 5, 6, AND 7 MEMBERED TRANSITION STATE RINGS ONLY
!
!TSANG 2007 1-C6H13=3-C6H13 5M P-S
C7H15-2A=C7H15-2D    6.92E0 3.2 1.6558E4
!TSANG 2007 1-C6H13=2-C6H13  6M P-S
C7H15-2A=C7H15-2E    1.82E2 2.55 1.096E4
!AWAN 2010 5-5MEH=2-5MEH, 5M T-S
C7H15-2B=C7H15-2E    1.27E1 3.07 1.744E4
!
!
!
!
!
!
!
!       2-METHYLHEPTANE
!
!
!
!
!
!
!       CLASS 4 ALKYL RADICAL ISOMERIZATION
!       INCLUDE 5, 6 AND 7 MEMBERED TRANSITION STATE RINGS
!
!
!TSANG 2007 1-C6H13=3-C6H13 5M P-S
C8H17-2A=C8H17-2D    6.92E0 3.2 1.6558E4
!TSANG 2007 1-C6H13=2-C6H13  6M P-S
C8H17-2A=C8H17-2E    1.82E2 2.55 1.096E4
!TSANG 2009 1-OCTYL=3-OCTYL. 7M P-S
C8H17-2A=C8H17-2F    2.96E0 3.08 1.102E4
!TSANG 2009 2-OCTY=4OCTYL, 5M S-S
C8H17-2C=C8H17-2F    1.42E0 3.32 1.614E4
!TSANG 2007 1-C6H13=2-C6H13  6M P-S
C8H17-2G=C8H17-2C    1.82E2 2.55 1.096E4
!TSANG 2007 1-C6H13=3-C6H13 5M P-S
C8H17-2G=C8H17-2D    6.92E0 3.2 1.6558E4
!
!
!       2-METHYLNONANE
!
!
!
!
!
!
!       CLASS 4 ALKYL RADICAL ISOMERIZATION
!       INCLUDE 5, 6, 7  MEMBERED TRANSITION STATE RINGS
!
!TSANG 2007 1-C6H13=3-C6H13 5M P-S
C10H21-2A=C10H21-2D    6.92E0 3.2 1.6558E4
!TSANG 2009 1-OCTYL=3-OCTYL. 7M P-S
C10H21-2A=C10H21-2F    2.96E0 3.08 1.102E4
!TSANG 2009 1-OCTYL=3-OCTYL. 7M P-S
C10H21-2I=C10H21-2D    2.96E0 3.08 1.102E4
!TSANG 2007 1-C6H13=3-C6H13 5M P-S
C10H21-2I=C10H21-2F    6.92E0 3.2 1.6558E4
!TSANG 2009 1-OCTYL=3-OCTYL. 7M P-S
C11H23-2A=C11H23-2F    2.96E0 3.08 1.102E4
!
!
!
!
!
!
!       2-METHYLHEPTANE
!
!
!
!
!
!
!
!       CLASS 5
!    H ATOM ABSTRACTION FROM ALKENES  BY OH, H, CH3, AND O
!
!
! THE FOLLOWING ARE GLOBAL REACTIONS USED FOR SIMPLICITY.  ABSTRACTIONS FORM A C8H15-1-2 RADICAL WHICH IS A LUMP OF ALL POSSIBLE RADICALS
C8H16-1-2+OH=C8H15-1-2+H2O    3.74E8 1.61 -3.5E1
C8H16-6-2+OH=C8H15-1-2+H2O    3.74E8 1.61 -3.5E1
!
!
C8H16-1-2+HO2=C8H15-1-2+H2O2    5.06E2 3.37 1.372E4
C8H16-6-2+HO2=C8H15-1-2+H2O2    5.06E2 3.37 1.372E4
!
! THE FOLLOWING ARE GLOBAL REACTIONS USED FOR SIMPLICITY.  ABSTRACTIONS FORM A C8H15-1-2 RADICAL WHICH IS A LUMP OF ALL POSSIBLE RADICALS
C8H16-1-2+H=C8H15-1-2+H2    1.04E7 2.4 4.471E3
C8H16-6-2+H=C8H15-1-2+H2    1.04E7 2.4 4.471E3
!
! THE FOLLOWING ARE GLOBAL REACTIONS USED FOR SIMPLICITY.  ABSTRACTIONS FORM A C8H15-1-2 RADICAL WHICH IS A LUMP OF ALL POSSIBLE RADICALS
C8H16-1-2+CH3=C8H15-1-2+CH4    1.21E1 3.46 5.481E3
C8H16-6-2+CH3=C8H15-1-2+CH4    1.21E1 3.46 5.481E3
!
! THE FOLLOWING ARE GLOBAL REACTIONS USED FOR SIMPLICITY.  ABSTRACTIONS FORM A C8H15-1-2 RADICAL WHICH IS A LUMP OF ALL POSSIBLE RADICALS
C8H16-1-2+O=C8H15-1-2+OH    4.42E6 2.45 2.83E3
C8H16-6-2+O=C8H15-1-2+OH    4.42E6 2.45 2.83E3
!
!
!
!
!
!       2-METHYLHEXANE
!
!
!
!
!
!
!
!       CLASS 6     ADDITION OF RADICAL SPECIES TO ALKENES
!
!
C7H14-1-2+OH=>CH2O+C6H13-2    1.0E11 0.0 -4.0E3
!
C7H14-1-2+O=>CH2O+C6H12-2    1.0E11 0.0 -1.05E3
!
!
!
!
!
!       2-METHYLHEPTANE
!
!
!
!
!
!
!
!
!
!
!
!
!
!       CLASS 6     ADDITION OF RADICAL SPECIES TO ALKENES
!
!
C8H16-1-2+OH=>CH2O+C7H15-2    1.0E11 0.0 -4.0E3
C8H16-6-2+OH=>CH3CHO+EC6H13    1.0E11 0.0 -4.0E3
!
C8H16-1-2+O=>CH2O+C7H14-2    1.0E11 0.0 -1.05E3
C8H16-6-2+O=>CH3CHO+DC6H12    1.0E11 0.0 -1.05E3
C11H22-5-2+OH=>NC5H11CHO+DC5H11    1.0E11 0.0 -4.0E3
C11H22-5-2+OH=>NC4H9CHO+EC6H13    1.0E11 0.0 -4.0E3
C11H22-5-2+O=>NC5H11CHO+CC5H10    1.0E11 0.0 -1.05E3
C11H22-5-2+O=>NC4H9CHO+DC6H12    1.0E11 0.0 -1.05E3
!
!
!       2-METHYLHEPTANE
! CLASS 7
!
C8H15-1-2+HO2=AC3H5CHO+PC4H9+OH    9.64E12 0.0 0.0E0
C8H15-1-2+CH3O2=AC3H5CHO+PC4H9+CH3O    9.64E12 0.0 0.0E0
C8H15-1-2+C2H5O2=AC3H5CHO+PC4H9+C2H5O    9.64E12 0.0 0.0E0
C8H15-1-2=IC4H8+C4H71-4    2.5E13 0.0 3.0E4
    REV/1.0E11 0.0E0 9.6E3/
C8H15-1-2=CC5H10+C3H5-A    2.5E13 0.0 2.5E4
    REV/1.0E11 0.0E0 9.6E3/
C8H15-1-2=DC6H12+C2H3    2.5E13 0.0 3.5E4
    REV/1.0E11 0.0E0 9.6E3/
!
C8H15-1-2=C3H5-T+C5H10-1    2.5E13 0.0 2.5E4
    REV/1.0E11 0.0E0 9.6E3/
C8H15-1-2=IC4H7+C4H8-1    2.5E13 0.0 3.0E4
    REV/1.0E11 0.0E0 9.6E3/
C8H15-1-2=IC5H9+C3H6    2.5E13 0.0 3.0E4
    REV/1.0E11 0.0E0 9.6E3/
!
!
!
!
!
!
!
!       2-METHYLHEXANE
!
!
!
!
!
!
!
!
!
!       CLASS 9     DECOMPOSITION OF ALKENES
!
!
C7H14-1-2=IC4H7+NC3H7    2.5E16 0.0 7.1E4
    REV/1.0E13 0.0E0 0.0E0/
!
!
!       2-METHYLHEPTANE
!
!
!
!
!       CLASS 9     DECOMPOSITION OF ALKENES
!
!
C8H16-1-2=IC4H7+PC4H9    2.5E16 0.0 7.1E4
    REV/1.0E13 0.0E0 0.0E0/
C8H16-6-2=IC5H9+NC3H7    2.5E16 0.0 7.1E4
    REV/1.0E13 0.0E0 0.0E0/
C11H22-5-2=C8H15-1-2+NC3H7    2.5E16 0.0 7.1E4
    REV/1.0E13 0.0E0 0.0E0/
C11H22-5-2=IC4H7+C7H15-1    2.5E16 0.0 7.1E4
    REV/1.0E13 0.0E0 0.0E0/
!
!
!
!
!
!
!
!
!
!       2-METHYLHEXANE
!
!
!
!
!
!
!
!
!
!       CLASS 10    RETROENE REACTIONS
!
!
!
!
C7H14-1-2=C4H8-1+C3H6    3.98E12 0.0 5.7629E4
C8H16-1-2=C5H10-1+C3H6    3.98E12 0.0 5.7629E4
C11H22-5-2=C3H6+C8H16-6-2    3.98E12 0.0 5.7629E4
C11H22-5-2=C7H14-1+IC4H8    3.98E12 0.0 5.7629E4
!
!
!
C8H16-6-2=C3H6+CC5H10    3.98E12 0.0 5.7629E4
C11H23-2F+O2=C11H23OO-6-2    7.54E12 0.0 0.0E0
!
!
!
!
!
!       2-METHYLHEXANE
!
!
!
!
!
!
!
!
!
!
!
!
!
!
!       CLASS 13       R. + HOO. = RO. + OH.
!       ADDITION OF ALKYL RADICAL (R.) WITH HYDROPEROXY RADICAL (HOO.) TO FORM RO AND OH.
!
!
!
!
!
C7H15-2A+HO2=C7H15O-1-2+OH    7.0E12 0.0 -1.0E3
C7H15-2D+HO2=C7H15O-4-2+OH    7.0E12 0.0 -1.0E3
C7H15-2E+HO2=C7H15O-5-2+OH    7.0E12 0.0 -1.0E3
!
!
!
!
!
!       2-METHYLHEPTANE
!
!
!
!       ADDITION OF ALKYL RADICAL (R.) WITH HYDROPEROXY RADICAL (HOO.) TO FORM RO AND OH.
!
!
!
!
!
C8H17-2A+HO2=C8H17O-1-2+OH    7.0E12 0.0 -1.0E3
C8H17-2C+HO2=C8H17O-3-2+OH    7.0E12 0.0 -1.0E3
C8H17-2E+HO2=C8H17O-5-2+OH    7.0E12 0.0 -1.0E3
C8H17-2G+HO2=C8H17O-7-2+OH    7.0E12 0.0 -1.0E3
!
!
!
!       CLASS 14
!
!
!
!
!
C7H15-2A+CH3O2=C7H15O-1-2+CH3O    7.0E12 0.0 -1.0E3
C7H15-2D+CH3O2=C7H15O-4-2+CH3O    7.0E12 0.0 -1.0E3
C7H15-2E+CH3O2=C7H15O-5-2+CH3O    7.0E12 0.0 -1.0E3
!
!
!
!
!
!       2-METHYLHEPTANE
!
!
!
!
!
!
!
!
C8H17-2A+CH3O2=C8H17O-1-2+CH3O    7.0E12 0.0 -1.0E3
C8H17-2C+CH3O2=C8H17O-3-2+CH3O    7.0E12 0.0 -1.0E3
C8H17-2E+CH3O2=C8H17O-5-2+CH3O    7.0E12 0.0 -1.0E3
C8H17-2G+CH3O2=C8H17O-7-2+CH3O    7.0E12 0.0 -1.0E3
C11H23OO-6-2=C11OOH6-2J    5.86E8 0.0 2.52E4
C11H23OO-6-2=C11H22-5-2+HO2    4.308E36 -7.5 3.951E4
!
!
!
!
!
!
!
!
!
!       2-METHYLHEXANE
!
!
!
!
!
!
!
!
!
!    CLASS 21
!
!    ROOH  =  RO + OH
!!
C7H15OOH-1-2=C7H15O-1-2+OH    1.0E16 0.0 3.9E4
!
!
!       2-METHYLHEPTANE
!
!
!
!
!
!       !    CLASS 21
!
!    ROOH  =  RO + OH
!
!
C8H17OOH-1-2=C8H17O-1-2+OH    1.0E16 0.0 3.9E4
!
!
!
!
!
!
!
!
!
!       2-METHYLHEXANE
!
!
!
!
!
!
!
!
!
!       CLASS 22    DECOMPOSITION OF AKYLPEROXY RADICAL (RO.)
!
!
CH2O+C6H13-2=>C7H15O-1-2    1.0E11 0.0 1.19E4
C2H5CHO+IC4H9=>C7H15O-4-2    1.0E11 0.0 1.19E4
CH3CHO+DC5H11=>C7H15O-5-2    1.0E11 0.0 1.19E4
!
!
!       2-METHYLHEPTANE
!
!
!
!
!
!
!
!       CLASS 22    DECOMPOSITION OF AKYLPEROXY RADICAL (RO.)
!
!
CH2O+C7H15-2=>C8H17O-1-2    1.0E11 0.0 1.19E4
C2H5CHO+DC5H11=>C8H17O-5-2    1.0E11 0.0 1.19E4
!
NC10H21CHO+O2=NC10H21CO+HO2    2.0E13 0.5 4.22E4
    REV/1.0E7 0.0E0 4.0E4/
NC10H21CHO+OH=NC10H21CO+H2O    2.69E10 0.76 -3.4E2
    REV/1.74E10 7.6E-1 3.12E4/
NC10H21CHO+H=NC10H21CO+H2    4.0E13 0.0 4.2E3
    REV/1.8E13 0.0E0 2.4E4/
NC10H21CHO+O=NC10H21CO+OH    5.0E12 0.0 1.79E3
    REV/1.0E12 0.0E0 1.9E4/
NC10H21CHO+HO2=NC10H21CO+H2O2    2.8E12 0.0 1.36E4
    REV/1.0E12 0.0E0 1.0E4/
NC10H21CHO+CH3=NC10H21CO+CH4    1.7E12 0.0 8.44E3
    REV/1.5E13 0.0E0 2.8E4/
NC10H21CHO+CH3O=NC10H21CO+CH3OH    1.15E11 0.0 1.28E3
    REV/3.0E11 0.0E0 1.8E4/
NC10H21CHO+CH3O2=NC10H21CO+CH3O2H    1.0E12 0.0 9.5E3
    REV/2.5E10 0.0E0 1.0E4/
NC10H21CO=C10H21-1+CO    1.0E11 0.0 9.6E3
    REV/1.0E11 0.0E0 0.0E0/
!
NC9H19CHO+O2=NC9H19CO+HO2    2.0E13 0.5 4.22E4
    REV/1.0E7 0.0E0 4.0E4/
NC9H19CHO+OH=NC9H19CO+H2O    2.69E10 0.76 -3.4E2
    REV/1.74E10 7.6E-1 3.12E4/
NC9H19CHO+H=NC9H19CO+H2    4.0E13 0.0 4.2E3
    REV/1.8E13 0.0E0 2.4E4/
NC9H19CHO+O=NC9H19CO+OH    5.0E12 0.0 1.79E3
    REV/1.0E12 0.0E0 1.9E4/
NC9H19CHO+HO2=NC9H19CO+H2O2    2.8E12 0.0 1.36E4
    REV/1.0E12 0.0E0 1.0E4/
NC9H19CHO+CH3=NC9H19CO+CH4    1.7E12 0.0 8.44E3
    REV/1.5E13 0.0E0 2.8E4/
NC9H19CHO+CH3O=NC9H19CO+CH3OH    1.15E11 0.0 1.28E3
    REV/3.0E11 0.0E0 1.8E4/
NC9H19CHO+CH3O2=NC9H19CO+CH3O2H    1.0E12 0.0 9.5E3
    REV/2.5E10 0.0E0 1.0E4/
NC9H19CO=C9H19-1+CO    1.0E11 0.0 9.6E3
    REV/1.0E11 0.0E0 0.0E0/
!
NC8H17CHO+O2=NC8H17CO+HO2    2.0E13 0.5 4.22E4
    REV/1.0E7 0.0E0 4.0E4/
NC8H17CHO+OH=NC8H17CO+H2O    2.69E10 0.76 -3.4E2
    REV/1.74E10 7.6E-1 3.12E4/
NC8H17CHO+H=NC8H17CO+H2    4.0E13 0.0 4.2E3
    REV/1.8E13 0.0E0 2.4E4/
NC8H17CHO+O=NC8H17CO+OH    5.0E12 0.0 1.79E3
    REV/1.0E12 0.0E0 1.9E4/
NC8H17CHO+HO2=NC8H17CO+H2O2    2.8E12 0.0 1.36E4
    REV/1.0E12 0.0E0 1.0E4/
NC8H17CHO+CH3=NC8H17CO+CH4    1.7E12 0.0 8.44E3
    REV/1.5E13 0.0E0 2.8E4/
NC8H17CHO+CH3O=NC8H17CO+CH3OH    1.15E11 0.0 1.28E3
    REV/3.0E11 0.0E0 1.8E4/
NC8H17CHO+CH3O2=NC8H17CO+CH3O2H    1.0E12 0.0 9.5E3
    REV/2.5E10 0.0E0 1.0E4/
NC8H17CO=C8H17-1+CO    1.0E11 0.0 9.6E3
    REV/1.0E11 0.0E0 0.0E0/
!
NC7H15CHO+O2=NC7H15CO+HO2    2.0E13 0.5 4.22E4
    REV/1.0E7 0.0E0 4.0E4/
NC7H15CHO+OH=NC7H15CO+H2O    2.69E10 0.76 -3.4E2
    REV/1.74E10 7.6E-1 3.12E4/
NC7H15CHO+H=NC7H15CO+H2    4.0E13 0.0 4.2E3
    REV/1.8E13 0.0E0 2.4E4/
NC7H15CHO+O=NC7H15CO+OH    5.0E12 0.0 1.79E3
    REV/1.0E12 0.0E0 1.9E4/
NC7H15CHO+HO2=NC7H15CO+H2O2    2.8E12 0.0 1.36E4
    REV/1.0E12 0.0E0 1.0E4/
NC7H15CHO+CH3=NC7H15CO+CH4    1.7E12 0.0 8.44E3
    REV/1.5E13 0.0E0 2.8E4/
NC7H15CHO+CH3O=NC7H15CO+CH3OH    1.15E11 0.0 1.28E3
    REV/3.0E11 0.0E0 1.8E4/
NC7H15CHO+CH3O2=NC7H15CO+CH3O2H    1.0E12 0.0 9.5E3
    REV/2.5E10 0.0E0 1.0E4/
NC7H15CO=C7H15-1+CO    1.0E11 0.0 9.6E3
    REV/1.0E11 0.0E0 0.0E0/
!
NC6H13CHO+O2=NC6H13CO+HO2    2.0E13 0.5 4.22E4
    REV/1.0E7 0.0E0 4.0E4/
NC6H13CHO+OH=NC6H13CO+H2O    2.69E10 0.76 -3.4E2
    REV/1.74E10 7.6E-1 3.12E4/
NC6H13CHO+H=NC6H13CO+H2    4.0E13 0.0 4.2E3
    REV/1.8E13 0.0E0 2.4E4/
NC6H13CHO+O=NC6H13CO+OH    5.0E12 0.0 1.79E3
    REV/1.0E12 0.0E0 1.9E4/
NC6H13CHO+HO2=NC6H13CO+H2O2    2.8E12 0.0 1.36E4
    REV/1.0E12 0.0E0 1.0E4/
NC6H13CHO+CH3=NC6H13CO+CH4    1.7E12 0.0 8.44E3
    REV/1.5E13 0.0E0 2.8E4/
NC6H13CHO+CH3O=NC6H13CO+CH3OH    1.15E11 0.0 1.28E3
    REV/3.0E11 0.0E0 1.8E4/
NC6H13CHO+CH3O2=NC6H13CO+CH3O2H    1.0E12 0.0 9.5E3
    REV/2.5E10 0.0E0 1.0E4/
NC6H13CO=C6H13-1+CO    1.0E11 0.0 9.6E3
    REV/1.0E11 0.0E0 0.0E0/
DC5H11=C2H4+IC3H7    1.138E15 -0.42 2.701E4
    REV/3.3E11 0.0E0 7.2E3/
DC5H11=CC5H10+H    2.199E16 -0.9 3.748E4
    REV/1.0E13 0.0E0 2.9E3/
DC5H11+O2=CC5H10+HO2    3.0E-19 0.0 3.0E3
    REV/2.0E-19 0.0E0 1.75E4/
CC5H10+OH=IC5H9+H2O    1.0E12 0.0 1.23E3
    REV/5.0E12 0.0E0 2.65E4/
CC5H10+H=IC5H9+H2    1.0E12 0.0 3.8E3
    REV/1.0E12 0.0E0 2.5E4/
CC5H10+CH3=IC5H9+CH4    5.0E11 0.0 7.3E3
    REV/6.0E11 0.0E0 2.5E4/
IC5H9=C3H4-A+C2H5    1.983E20 -1.63 5.924E4
    REV/2.0E11 0.0E0 8.3E3/
CC5H10=CH3+C4H72-2    2.5E16 0.0 7.1E4
    REV/1.0E13 0.0E0 0.0E0/
EC6H13=IC4H9+C2H4    1.616E18 -1.56 3.04E4
    REV/1.7E11 0.0E0 7.8E3/
EC6H13=DC6H12+H    3.314E16 -0.89 3.795E4
    REV/1.6E13 0.0E0 2.9E3/
EC6H13+O2=DC6H12+HO2    3.0E-19 0.0 3.0E3
    REV/2.0E-19 0.0E0 1.75E4/
DC6H12+OH=>DC5H11+CH2O    1.0E11 0.0 -4.0E3
DC6H12+O=>DC5H11+HCO    1.0E11 0.0 -1.05E3
DC6H12=IC3H7+C3H5-A    1.0E16 0.0 7.1E4
    REV/1.0E13 0.0E0 0.0E0/
!
!
!CH3CHCHO CHEMISTRY
CH3CHCHO+HO2=C2H5CHO+O2    7.35E12 0.0 1.31E3
    REV/8.071E13 -8.0E-2 4.507E4/
CH3CHCHO=C2H3CHO+H    3.515E15 -0.51 4.106E4
    REV/6.5E12 0.0E0 2.9E3/
CH3CHCHO=CH3CHCO+H    1.135E16 -0.66 4.031E4
    REV/5.0E12 0.0E0 1.2E3/
CH3CHCHO+H2=C2H5CHO+H    2.16E5 2.38 1.899E4
    REV/4.309E4 2.63E0 5.265E3/
C2H5CHO+HO2=CH3CHCHO+H2O2    8.0E10 0.0 1.192E4
    REV/1.031E13 -5.7E-1 9.337E3/
CH3CHCHO+O2=CH3CHCO+HO2    1.81E11 0.0 1.84E3
    REV/2.731E10 -1.0E-2 1.269E4/
CH3CHCHO+O2=C2H3CHO+HO2    2.725E11 0.0 7.24E3
    REV/1.726E11 -1.6E-1 1.904E4/
CH3CHCHO+O2=>CH3CHO+CO+OH    3.62E10 0.0 0.0E0
!
!!!!!!!!!!!!!!!!!!!!!!!!!!!!!!!!!!!!!!!!!!!!!!!!!!!!!!!!!!!!!!!!!!!!!!!!!!!!!!!!!!!!!!!!!!!
!!!!!!!!!!!!!!!!!!!!!!!!!!!!!!!!!!!!!!!!!!!!!!!!!!!!!!!!!!!!!!!!!!!!!!!!!!!!!!!!!!!!!!!!!!!
!!!!!!!!!!!!!!!!!!!!!!!!!!!!!!!!!!!!!!!!!!!!!!!!!!!!!!!!!!!!!!!!!!!!!!!!!!!!!!!!!!!!!!!!!!!
!!!!!!!!!!!!!!!!!!!!!!!!!!!!!!!!!!!!!!!!!!!!!!!!!!!!!!!!!!!!!!!!!!!!!!!!!!!!!!!!!!!!!!!!!!!
!!!!!!!!!!!!!!!!!!!!!!!!!!!!!!!!!!!!!!!!!!!!!!!!!!!!!!!!!!!!!!!!!!!!!!!!!!!!!!!!!!!!!!!!!!!
!!!!!!!!!!!!!!!!!!!!!!!!!!!!!!!!!!!!!!!!!!!!!!!!!!!!!!!!!!!!!!!!!!!!!!!!!!!!!!!!!!!!!!!!!!!
!!!!!!!!!!!!!!!!!!!!!!!!!!!!!!!!!!!!!!!!!!!!!!!!!!!!!!!!!!!!!!!!!!!!!!!!!!!!!!!!!!!!!!!!!!!
!!!!!!!!!!!!!!!!!!!!!!!!!!!!!!!!!!!!!!!!!!!!!!!!!!!!!!!!!!!!!!!!!!!!!!!!!!!!!!!!!!!!!!!!!!!
!!!!!!!!!!!!!!!!!!!!!!!!!!!!!!!!!!!!!!!!!!!!!!!!!!!!!!!!!!!!!!!!!!!!!!!!!!!!!!!!!!!!!!!!!!!
!!!!!!!!!!!!!!!!!!!!!!!!!!!!!!!!!!!!!!!!!!!!!!!!!!!!!!!!!!!!!!!!!!!!!!!!!!!!!!!!!!!!!!!!!!!
!!!!!!!!!!!!!!!!!!!!!!!!!!!!!!!!!!!!!!!!!!!!!!!!!!!!!!!!!!!!!!!!!!!!!!!!!!!!!!!!!!!!!!!!!!!
!!!!!!!!!!!!!!!!!!!!!!!!!!!!!!!!!!!!!!!!!!!!!!!!!!!!!!!!!!!!!!!!!!!!!!!!!!!!!!!!!!!!!!!!!!!
!!!!!!!!!!!!!!!!!!!!!!!!!!!!!!!!!!!!!!!!!!!!!!!!!!!!!!!!!!!!!!!!!!!!!!!!!!!!!!!!!!!!!!!!!!!
!!!!!!!!!!!!!!!!!!!!!!!!!!!!!!!!!!!!!!!!!!!!!!!!!!!!!!!!!!!!!!!!!!!!!!!!!!!!!!!!!!!!!!!!!!!
!!!!!!!!!!!!!!!!!!!!!!!!!!!!!!!!!!!!!!!!!!!!!!!!!!!!!!!!!!!!!!!!!!!!!!!!!!!!!!!!!!!!!!!!!!!
!!!!!!!!!!!!!!!!!!!!!!!!!!!!!!!!!!!!!!!!!!!!!!!!!!!!!!!!!!!!!!!!!!!!!!!!!!!!!!!!!!!!!!!!!!!
!!!!!!!!!!!!!!!!!!!!!!!!!!!!!!!!!!!!!!!!!!!!!!!!!!!!!!!!!!!!!!!!!!!!!!!!!!!!!!!!!!!!!!!!!!!
!!!!!!!!!!!!!!!!!!!!!!!!!!!!!!!!!!!!!!!!!!!!!!!!!!!!!!!!!!!!!!!!!!!!!!!!!!!!!!!!!!!!!!!!!!!
!!!!!!!!!!!!!!!!!!!!!!!!!!!!!!!!!!!!!!!!!!!!!!!!!!!!!!!!!!!!!!!!!!!!!!!!!!!!!!!!!!!!!!!!!!!
!
!CY13PD
!
!INITIATIONS
!
!NIST
CY13PD=CY13PD5J+H    1.0E15 0.0 7.8E4
CY13PD+O2=CY13PD5J+HO2    5.0E12 0.0 3.715E4
!
!
!ADDITIONS
!
!
!
CY13PD+H=CYC5H7U1    4.0E12 0.0 0.0E0
!SUBSTITUTIONS
!
CY13PD+O=C4H6+CO    1.02E14 -0.34 4.674E3
!
!ABSTRACTIONS
!
!PITZ2001
CY13PD+H=H2+CY13PD5J    1.6E6 2.4 4.471E3
!PITZ2001
CY13PD+O=CY13PD5J+OH    6.03E10 0.7 7.633E3
!PITZ2001
CY13PD+OH=CY13PD5J+H2O    4.12E6 2.0 -2.98E2
!PITZ2001
CY13PD+HO2=CY13PD5J+H2O2    4.0E12 0.0 1.59E4
!PITZ2001
CY13PD+HCO=CY13PD5J+CH2O    7.2E6 1.9 1.701E4
!PITZ2001
CY13PD+CH3=CH4+CY13PD5J    1.8E-1 4.0 0.0E0
!PITZ2001
CY13PD+C2H3=CY13PD5J+C2H4    1.2E-1 4.0 0.0E0
!PITZ2001
CY13PD+C3H5-A=C3H6+CY13PD5J    6.0E12 0.0 1.5E4
!MM
CY13PD+C3H3=CY13PD5J+C3H4-A    6.0E12 0.0 1.2E4
!MM
CY13PD+C3H3=CY13PD5J+C3H4-P    6.0E12 0.0 1.2E4
!MM
CY13PD+NC4H5=C4H6+CY13PD5J    3.0E12 0.0 5.0E3
!MM
CY13PD+C6H5=C6H6+CY13PD5J    6.0E12 0.0 6.0E3
!
CY13PD+C6H5=CJCXCC#C+C6H6    1.87E0 3.81 2.206E3
CY13PD+H=CJCXCC#C+H2    8.04E5 2.5 1.228E4
!
!
CJCXCC#C+HO2=OH+CO+NC4H5    8.0E12 0.0 0.0E0
CJCXCC#C+O2=CO+C3H3+CH2O    1.0E12 0.0 0.0E0
!
!
!
!PITZ2001
CY13PD+C2H3=C6H6+CH3    2.12E67 -16.08 4.264E4
!!!REV/ 1.00E+14   0.0   0.0 /
!
CY13PD+CY13PD5J=IND+CH3    2.0E12 0.0 2.0E4
!
!
! ! 2000MOS/LIN415-425!     FREQ_FAC2
CY13PD5J=CJCXCC#C    2.0E13 0.0 7.7E4
!MM  1.00E+12    0.0     31000.0   !ALZUETA19982000
CJCXCC#C=C3H3+C2H2    1.0E13 0.0 3.8E4
C3H3+CH3=C4H6    1.0E14 0.0 0.0E0
!
!
!PITZ2001
CY13PD5J+C2H3CHO=C2H3CO+CY13PD    1.0E13 0.0 8.843E3
!
!
!
!RING OPENING
!
CY13PD5J+O=NC4H5+CO    1.51E14 -0.29 3.5E2
!PITZ2001
CXCCXCCJ+O2=C2H3CHCHO+CH2O    8.16E10 0.18 9.14E3
!PITZ2001
CXCCXCCJ+H=NC4H5+CH3    2.91E26 -2.18 3.677E4
!ALZUETA19982000
CXCCXCCJ+O=C2H3CHO+C2H3    2.0E14 0.0 0.0E0
CXCCXCCJ+HO2=C2H3CHO+C2H3+OH    8.0E12 0.0 0.0E0
!
!
!
!MM VINYLIC 8.43E+12    0.0      -874.0   !PITZ2001
C4H6+OH=NC4H5+H2O    1.8E6 2.0 2.5E3
!MM similar to c2h3+ho2
C4H6+O2=NC4H5+HO2    4.0E13 0.0 5.82E4
!
!
!PITZ2001
NC4H5+C2H4=C4H6+C2H3    6.31E11 0.0 7.8E3
!PITZ2001
NC4H5+H2=H+C4H6    3.9E9 0.5 3.704E3
!MM
NC4H5+CH2O=C4H6+HCO    5.42E3 2.81 5.86E3
!PITZ2001
NC4H5+H=C4H6    1.13E45 -9.05 1.583E4
!PITZ2001
NC4H5+H=2C2H3    3.91E46 -8.66 3.225E4
!PITZ2001
NC4H5=C2H2+C2H3    1.0E14 0.0 4.389E4
!PITZ2001
NC4H5+O2=C2H3CHO+HCO    3.32E24 -3.67 6.19E3
!!!!!NC4H5+CH3=C5H81-3                       5.00E+13    0.0         0.0   !MM
!2007SEN/MIL3740-3747
NC4H5+C2H2=C6H6+H    1.39E16 -1.0 8.9E3
!
C2H3+C4H4=C6H6+H    1.39E16 -1.0 8.9E3
!
!MM  (????)
NC4H5=C4H4+H    1.0E14 0.0 4.0E4
!PITZ2001
C4H4+O=HCCO+C2H3    1.0E13 0.0 0.0E0
!!!!C4H4+OH=NC4H3+H2O                       1.00E+13    0.0     5675.00   !!
!MM
C4H4+OH=CH2CO+C2H3    3.0E13 0.0 0.0E0
!!!!C4H4+H=NC4H3+H2                         5.00E+13    0.0    14130.00   !Literature review 1988GHI/COL5839 + Milano
! WJP: reverse rate above collisional for T(1800K.  Remove:
!C4H4+CH3=C3H4-P+C2H3                    1.00E+13    0.0      6000.0   !MM
!1986CHA/HEI701
C4H4+C2H2=C6H6    4.47E11 0.0 3.0E4
! WJP: Reverse rate above collisonal.  Make reaction one way. Reaction occurs in 2 steps:
!PITZ2001
C2H3CHCHO+HO2=>C2H3CHO+HCO+OH    3.5E12 0.0 -1.0E3
!WJP: analogy with ch2cho=ch3+co http://kinetics.nist.gov/kinetics/Detail?id=2006SEN/KLI5772-5781:2
C2H3CHCHO=>C3H5-A+CO    2.93E12 0.29 4.03E4
!C2H3CHCHO=C3H5-A+CO                        6.10E+05    0.92    -1120.0  !ALZUETA19982000
!WJP: Products not probable:
!C2H3CHCHO=C3H4-A+HCO                       6.10E+05    0.92    -1120.0  !ALZUETA19982000
!ALZUETA19982000
C2H3CHCHO+O2=C2H3CHO+OCHO    1.2E36 -7.25 3.36E4
!PITZ2001
CXOCCCJCXO+O2=CXOCCCXO+OCHO    6.29E5 1.65 1.748E4
!PITZ2001
CXOCCCXO+H=H2+CXOCCCJXO    2.29E10 1.05 3.279E3
!PITZ2001
CXOCCCXO+OH=H2O+CXOCCCJXO    3.49E9 1.18 -4.47E2
!PITZ2001
CH2CH2CHO+CO=CXOCCCJXO    1.5E11 0.0 4.8E3
!PITZ2001
C3H5-A+OH=C3H4-A+H2O    6.03E12 0.0 0.0E0
!PITZ2001
OCHO+O=OH+CO2    6.0E12 0.0 0.0E0
!PITZ2001
OCHO+OH=H2O+CO2    6.0E12 0.0 0.0E0
! Duplicate reaction with OCHO+M(=)H+CO2+M 5.318E+14 -0.353 1.758E+04
!OCHO=CO2+H                            1.75E+12    0.307   32920.0    !PITZ2001
!PITZ2001
2C3H3=C6H5+H    3.67E26 -3.88 2.896E4
!!!!C3H3+C3H3=CXCC(C#C)XC                   1.48E+55  -12.30    23620.0    !PITZ2001
!PITZ2001
2C3H3=C6H6    3.89E50 -11.01 2.032E4
!PITZ2001
CYC5H7U1+O2=CXOCCCJCXO    8.0E24 -3.8 2.0E4
!ALZUETA19982000
CYC5H7U1=CXCCXCCJ    3.2E15 0.0 3.95E4
!
!
!
!
!BENZENE
!
!BENZENE _ FULVENE
!
C6H6=C6H5+H    5.5E38 -6.18 1.32E5
!
!ABSTRACTIONS
!
!PITZ2001 67832.0 ( 1971ASA/FUJ1-12 suggests 60000)
C6H6+O2=C6H5+HO2    6.31E13 0.0 6.0832E4
!MM PITZ2001  2.00E+13    0.0     18600.0
C6H6+H=C6H5+H2    6.0E13 0.0 1.2E4
!PITZ2001
C6H6+HO2=C6H5+H2O2    7.5E3 2.5 2.7619E4
!!!! FROM MILANO  8.00E+13    0.00    12700.0  !
C6H6+O=C6H5+OH    1.624E7 2.0 8.78196E3
! 23.37E+03    2.68      730.0    !    1.63E+08    1.42     1451.0  !PITZ2001
C6H6+OH=C6H5+H2O    2.337E4 2.68 7.3E2
!Pitz est based on Tsang's c2h4+ch3 matched to 2006HEM/VAN13624-13631
C6H6+CH3=C6H5+CH4    1.7E0 3.7 9.5E3
!
!
!NANCY
C6H5+O2=OC6H4O+H    3.0E13 0.0 9.0E3
!!!!!!!!!OC6H4O=C5H4+CO2                         3.50E+12    0.00    67000.0  !ALZUETA19982000  NOT CONFIRMED C5H4=CYCLOPENTADIENYLIDE RADICAL
!OC6H4O+H=C5H5O1_1+CO                    2.50E+13    0.00     4700.0 !ALZUETA19982000  C5H5O=C5H5O1_1 IN TERMS OF PITZ MODEL
!OC6H4O+H=)CO+C2H3CO+C2H2               2.00E+12    0.00     8100.0 !ALZUETA19982000  H ATOM ABSTRACTION REACTION IN AROMATIC H  !NET
!
!
OC6H4O+H=>CO+C2H3CO+C2H2    2.5E13 0.0 4.7E3
!
!
OC6H4O+O=>CO+HCCO+C2H3CO    2.48E14 -0.34 4.674E3
    DUP
!ALZUETA19982000 !NET
OC6H4O+O=>CO+HCCO+C2H3CO    1.4E13 0.0 1.47E4
    DUP
!ALZUETA19982000 NEED ADDITION REACTION FOR LOW TEMP
OC6H4O+OH=>HCO+C2H3CO+HCCO    1.0E6 2.0 4.0E3
! WJP: Not sure of structure of LC6H5.  Remove it:
!C6H5=LC6H5                              2.11E+12    0.0     59750.0  !SAKAI et al. 2007
! WJP: Reverse rate from thermo is above collisional by 1.e10 times. Not sure of structure of LC6H5.  Remove it:
!LC6H5=NC4H3+C2H2                        5.00E+14    0.0     38000.0  !SAKAI et al. 2007
C6H5(+M)=C6H4+H(+M)    4.3E12 0.6 7.73E4
    LOW/1.0E84 -1.887E1 9.01E4/
    TROE/9.02E-1 6.96E2 3.58E2 3.856E3/
C4H2+C2H2=C6H4    1.4E7 1.4 2.541E4
!Eiteneer_Frenklach IJCK2003
C2H+C2H2=C4H2+H    1.94E13 0.238 -7.35E1
!C6H5+O=C6H5OJ                           1.00E+14    0.0         0.0
C6H5+O=CJCXCC#C+CO    1.0E14 0.0 0.0E0
END
